# Supplementary material for: Gender norms in sexual and reproductive health and rights: Insights from young Angolan women and the development of a context-specific questionnaire
Source: Research Square preprint supplement (doi:10.21203/rs.3.rs-7037473/v1), 2025-07-16
Supplement: Supplementary file 1 [file 992d9cae8fc83258ec54119e.pdf]

## Additional file 1 Key informant overview and interview guide

| Organisational subdivision                         | Health and rights focus       | Organisational reach | Date of interview |
|----------------------------------------------------|-------------------------------|----------------------|-------------------|
| <b>Government department</b>                       |                               |                      |                   |
| National direction of public health                | Community health              | National             | 2021-07-26        |
| National direction of public health                | Adolescent health             | National             | 2021-07-26        |
| National direction of public health                | Mental health                 | National             | 2021-07-27        |
| National direction of public health                | Gender equality               | National             | 2021-07-29        |
| National direction of public health                | Gender equality               | National             | 2021-07-29        |
| Provincial direction of public health              | Women's health                | Provincial           | 2021-08-04        |
| Provincial direction of public health              | SRHR                          | Municipal            | 2021-08-05        |
| Provincial direction of public health              | Maternal health               | Municipal            | 2021-08-05        |
| Provincial direction of public health              | Maternal health               | Municipal            | 2021-08-06        |
| Provincial direction of public health              | SRHR                          | Municipal            | 2021-08-06        |
| <b>National non-governmental organisation</b>      |                               |                      |                   |
| Women's rights                                     | Gender equality               | Municipal            | 2021-08-04        |
| Women's rights                                     | Gender equality               | National             | 2021-08-04        |
| Community development                              | Gender equality               | Provincial           | 2021-08-05        |
| Community development                              | Gender equality               | Provincial           | 2021-08-06        |
| Women's rights                                     | Gender equality               | National             | 2021-08-06        |
| Community development                              | Gender equality               | Provincial           | 2021-08-09        |
| Women's rights                                     | Gender equality               | National             | 2021-08-27        |
| Women's rights                                     | Gender equality               | National             | 2021-09-03        |
| <b>Non-Angolan government</b>                      |                               |                      |                   |
| International development agency                   | Maternal health               | Provincial           | 2021-07-30        |
| International development agency                   | Maternal health               | National             | 2021-08-10        |
| International development agency                   | Women's health and rights     | National             | 2021-08-25        |
| <b>International non-governmental organisation</b> |                               |                      |                   |
| Health systems strengthening                       | Gender equality               | National             | 2021-07-27        |
| Community development                              | Social determinants of health | Provincial           | 2021-08-03        |
| Community development                              | Social determinants of health | Provincial           | 2021-08-04        |
| Community development                              | Social determinants of health | Provincial           | 2021-09-16        |

## Interview Guide

### General Perspectives on Women's Health and Rights

1. From your perspective:
  - a. What are the main challenges currently facing women's health in Angola?
  - b. What are the main challenges related to women's human rights in Angola?
2. In your opinion, what are the key barriers to improving:
  - a. Women's health?
  - b. Women's rights (e.g. the right to health, social security)?

### Organisational Focus and Activities

3. How would you describe the main focus of your organisation?
4. What specific activities does your organisation undertake?  
(probing: target groups, geographical areas, health-related themes, etc.)
5. Could you elaborate on any programmes that focus specifically on women's health and rights?  
(probing: details such as target groups, geographic coverage, etc.)

6. Regarding these programmes:
  - a. What are the main challenges in achieving the intended goals? (*probing: elaborate on why these challenges exist*)
  - b. What would an ideal scenario look like for successful implementation of the programmes? (*probing: elaborate on why this would be ideal*)
7. What factors determine the areas your organisation prioritises? (*probing: elaborate on how priorities and decisions are established; on what basis—e.g. mandate, funding sources, strategic focus*)

#### Wider Programming and Collaboration

8. Are you aware of other organisations or programmes—national or international—working on similar themes?
9. Does your organisation collaborate with any of these actors? (*probing: elaborate on the nature of collaborations*)

#### Reflections on Gaps and Opportunities

10. In your view, what is needed to increase interest and engagement in women's health and rights?
11. Do you believe there are specific themes related to women's health and rights that are often overlooked, neglected, or considered taboo? (*probing: elaborate on why they think this is the case*)
