# Supplementary material for: Gender norms in sexual and reproductive health and rights: Insights from young Angolan women and the development of a context-specific questionnaire
Source: Research Square preprint supplement (doi:10.21203/rs.3.rs-7037473/v1), 2025-07-16
Supplement: Supplementary file 1 [file d0b90a77d6ccfaac39327e8e.xlsx]

## Sheet: Table 2
AcqInfoPregCB	Area type	FertilePknow	Education	HouseNight hunger	HouseWealth	IPV	Literate	MenstAuton	FP_aware	FP_use	Pregnancy	Province	Work
0	2	1	0	0		0	0	0	1	1	1	3	0
1	2	0	0	1		0	0	1	1	1	0	3	1
1	1	0	2	1		1	1	1	1	0	0	3	0
1	2	0	0	1	-3.88957	1	0	0	1	0	0	3	0
0	2	0	0	1	-3.77734	1	0	0	1	0	0	3	0
0	2	0	1	0	-3.77734	1	1	0	1	0	0	3	0
0	1	0	0		-3.77734	1	0	0	1	1	2	3	0
0	2	0	0	1	-3.77734	1	0	1	0	0	1	3	0
0	2	1	1	1	-3.77734	0	0	0	0	0	0	3	0
0	2	1	1	0	-3.77734	0	1	0	0	0	2	3	0
0	2	1	0	0	-3.77734	0	0	0	0	0	0	3	0
0	2	0	2	0	-3.77734	0	1	0	1	1	1	3	0
0	2	0	0	0	-3.77734	0	0	0	1	1	0	3	0
0	2	1	0	0	-3.77734	1	0	0	0	0	0	3	0
0	2	0	0	0	-3.77734	0	0	0	1	0	0	3	0
0	2	1	0	0	-3.77734	0	0	0	0	0	0	3	0
1	2	0	0	0	-3.77734	0	0	0	1	0	0	3	0
1	2	0	0	0	-3.77734	0	0	0	0	0	0	3	0
1	1	0	0	1	-3.77734	0	0	1	1	0	1	3	0
1	2	0	0	0	-3.77734	0	1	0	1	0	0	3	0
1	2	0	0	0	-3.77734	0	0	0	1	1	1	3	0
1	2	1	1	0	-3.77734	0	0	0	0	0	1	3	0
1	2	0	0	0	-3.77734	0	0	0	1	1	0	3	0
0	1	0	0	0	-3.72718	0	0	1	0	0	0	3	0
1	2	0	0	0	-3.71961	0	0	0	1	0	0	3	1
0	2	1	1	1	-3.686	1	1	0	0	0	0	3	0
0	2	1	1	1	-3.686	0	1	0	1	0	0	3	2
0	2	0	1	0	-3.66199	1	1	0	1	0	2	3	0
0	2	0	1	0	-3.66199	0	1	0	1	1	0	3	0
0	2	0	0	1	-3.66199	0	0	0	0	0	0	3	0
0	2	0	0	0	-3.66199	0	0	0	0	0	2	3	0
0	2	0	0	1	-3.66199	0	0	1	0	0	2	3	0
0	2	0	0	1	-3.66199	1	0	1	0	0	1	3	0
0	2	1	1	0	-3.66199	0	0	0	0	0	0	3	1
0	2	0	0	0	-3.66199	1	0	0	1	1	0	3	0
0	2	0	1	0	-3.66199	0	0	0	1	1	0	3	0
0	2	0	0	0	-3.66199	0	0	1	0	0	0	3	0
0	2	1	0	1	-3.66199	1	0	0	0	0	0	3	0
0	2	0	0	1	-3.66199	0	0	0	1	0	0	3	0
0	2	0	0	1	-3.66199	1	1	1	0	0	2	3	0
0	2	1	0	0	-3.66199	1	0	0	1	0	0	3	0
1	2	0	1	1	-3.66199	0	1	0	1	0	0	3	0
1	2	0	0	0	-3.66199	0	0	0	0	0	1	3	0
1	2	0	0	0	-3.66199	1	0	0	1	0	1	3	0
1	2	0	0	0	-3.66199	0	0	1	0	0	0	3	0
0	2	1	0	1	-3.62479	0	0	0	1	0	1	3	0
0	1	0	0	1	-3.61495	0	0	0	0	0	0	3	0
0	2	0	0	0	-3.60425	1	0	0	1	1	2	3	0
0	2	0	0	0	-3.60425	0	0	0	0	0	1	3	0
0	2	0	0	0	-3.60425	0	0	0	0	0	0	3	2
0	2	0	0	0	-3.60425	1	0	0	1	0	2	3	0
0	2	0	0	1	-3.60425	0	0	0	1	0	0	3	0
0	2	0	2	1	-3.60425	0	1	0	1	0	0	3	0
0	2	0	0	0	-3.60425	0	0	0	0	0	1	3	0
0	2	0	0	0	-3.57377	0	0	0	1	1	0	3	0
0	2	0	0	0	-3.57377	0	0	0	0	0	0	3	0
0	2	0	0	0	-3.57377	0	0	0	1	1	0	3	0
0	2	0	0	1	-3.57377	0	0	1	1	0	0	3	0
0	2	1	0	1	-3.57377	0	0	1	1	0	0	3	0
0	2	0	1	0	-3.57377	0	1	0	1	0	0	3	0
0	2	0	0	0	-3.57377	1	0	0	1	0	0	3	0
0	2	1	2	0	-3.57377	0	1	0	1	0	0	3	0
0	2	0	1	1	-3.57377	1	0	0	1	1	1	3	1
0	2	1	2	0	-3.57377	1	1	0	0	0	1	3	0
1	2	0	0	0	-3.57377	0	0	0	0	0	0	3	0
1	2	1	0	1	-3.57377	0	0	0	1	1	0	3	0
1	2	0	0	0	-3.57377	0	0	1	1	0	0	3	0
1	2	0	1	0	-3.57377	0	0	0	1	0	0	3	0
0	2	0	1	0	-3.57064	0	1	1	1	0	0	3	0
0	2	0	0	1	-3.53957	0	0	0	1	1	1	3	0
1	2	0	0	0	-3.51692	0	0	1	0	0	0	3	0
0	2	0	0	0	-3.51636	0	0	0	0	0	2	3	0
0	2	0	0	0	-3.51603	1	0	0	1	0	0	3	0
0	2	0	1	0	-3.51603	0	1	1	1	1	1	3	0
0	2	0	0	0	-3.51603	0	1	0	1	1	2	3	0
0	2	0	0	0	-3.51603	1	0	0	0	0	0	3	0
0	2	0	0	0	-3.51603	0	0	0	1	0	0	3	0
0	2	0	1	1	-3.51603	0	1	0	1	0	1	3	0
0	2	0	0	0	-3.51256	0	0	1	0	0	0	3	0
0	2	1	1	1	-3.50944	1	1	1	1	1	0	3	1
0	2	0	0	0	-3.49959	0	0	0	0	0	2	3	0
0	2	0	0	0	-3.4624	0	0	0	0	0	0	3	0
1	2	1	0	1	-3.46186	1	0	0	0	0	0	3	2
0	2	0	0	1	-3.45841	1	0	0	1	0	0	3	2
0	2	1	0	1	-3.45841	1	0	1	1	0	1	3	0
0	2	0	0	0	-3.45841	0	0	0	0	0	2	3	0
0	2	0	0	0	-3.45841	1	0	0	1	0	2	3	0
0	2	0	0	0	-3.45841	1	0	0	0	0	2	3	0
0	2	0	0	0	-3.45841	1	0	0	0	0	0	3	0
0	2	0	0	0	-3.45841	0	0	0	1	1	2	3	0
0	2	0	0	0	-3.45841	1	0	0	1	0	0	3	0
0	2	0	1	0	-3.45841	1	0	0	0	0	2	3	0
0	2	1	2	0	-3.45841	1	1	0	0	0	1	3	0
1	2	0	0	0	-3.45841	0	0	0	1	0	1	3	0
1	2	0	0	1	-3.45587	1	0	0	1	0	1	3	0
1	2	0	0	0	-3.45587	0	0	0	0	0	1	3	0
0	2	0	0	1	-3.42734	0	0	0	0	0	2	3	0
0	2	0	0	0	-3.42734	0	0	1	0	0	0	3	0
1	2	0	0	0	-3.42734	1	0	1	1	1	0	3	0
0	2	0	0	1	-3.41137	0	0	1	1	0	1	3	1
0	2	1	0	0	-3.41137	0	1	0	1	0	0	3	0
0	2	0	1	0	-3.41137	1	1	0	1	0	2	3	0
0	2	0	0	0	-3.41137	1	0	0	0	0	0	3	0
1	2	0	0	1	-3.40156	0	0	1	1	1	0	3	0
0	2	0	0	0	-3.40068	0	0	0	0	0	1	3	0
0	2	0	0	0	-3.40068	1	0	0	1	0	0	3	0
0	2	0	1	1	-3.40068	1	0	1	0		2	3	0
0	2	0	1	0	-3.40068	0	1	0	1	0	1	3	0
0	2	0	0	0	-3.40068	1	0	0	0	0	0	3	0
0	2	0	1	0	-3.40068	1	0	1	0	0	0	3	0
0	2	0	0	0	-3.40068	0	0	0	1	0	1	3	0
0	2	0	0	0	-3.40068	1	0	0	1	0	0	3	0
0	2	0	1	1	-3.40068	0	1	0	1	0	1	3	0
1	2	1	1	0	-3.40068	0	1	1	1	0	0	3	0
1	2	0	0	0	-3.40068	0	0	0	1	0	0	3	0
0	2	0	0	1	-3.39721	0	0	0	1	0	1	3	0
1	2	0	0	0	-3.39501	0	0	0	1	0	0	3	0
1	2	1	0	1	-3.39501	0	0	0	1	0	0	3	0
0	2	0	0	0	-3.39302	1	0	1	0	0	2	3	0
0	2	0	1	0	-3.39302	0	1	0	1	0	2	3	0
0	1	0	0	0	-3.35017	0	0	0	0	0	0	3	1
0	2	0	0	0	-3.35017	0	0	0	1	0	1	3	0
0	2	0	0	0	-3.35017	1	0	0	1	0	1	3	0
1	2	0	0	0	-3.35017	1	0	0	1	0	0	3	0
1	2	1	0	1	-3.34396	0	0	0	0	0	1	3	0
1	2	0	0	0	-3.34052	0	0	0	1	0	0	3	1
1	2	0	0	0	-3.34052	0	0	1	1	0	0	3	1
1	2	0	0	1	-3.34052	1	0	1	1	0	2	3	0
1	2	0	0	1	-3.33223	1	0	1	1	0	1	3	0
0	2	0	0	1	-3.32165	1	0	0	1	0	1	3	0
0	2	0	0	0	-3.32165	0	1	0	1	0	0	3	0
0	2	0	1	0	-3.32165	0	0	0	1	1	0	3	0
1	2	1	1	1	-3.31334	1	1	1	1	1	1	3	0
0	2	0	0	0	-3.31198	0	0	0	1	0	1	3	0
0	2	0	0	1	-3.31198	0	0	0	0	0	1	3	0
0	2	0	0	0	-3.31198	0	0	0	0	0	0	3	0
0	2	0	0	0	-3.31198	1	0	0	1	0	1	3	0
0	2	0	0	0	-3.31198	1	0	0	1	0	1	3	0
1	2	0	1	1	-3.31198	0	1	0	0	0	0	3	0
1	2	0	0	1	-3.31198	1	1	1	1	0	2	3	0
0	2	0	0	0	-3.3068	0	0	0	1	0	0	3	0
0	1	0	0	1	-3.29348	0	0	1	1	0	0	3	0
0	1	0	1	0	-3.29348	0	0	0	1	0	2	3	1
1	2	0	0	0	-3.29348	0	0	0	1	0	1	3	0
0	2	0	1	0	-3.26715	0	1	0	1	1	2	3	0
0	2	0	1	1	-3.26402	1	1	0	0	0	2	3	0
1	2	0	0	0	-3.25769	0	0	1	1	1	0	3	0
0	2	1	0	0	-3.2523	0	0	0	1	1		3	0
0	2	1	1	0	-3.2523	1	1	0	0	0	1	3	0
0	2	0	0	0	-3.23829	0	0	0	0	0	0	3	0
1	2	0	0	1	-3.23481	1	0	0	1	0	0	3	2
0	2	0	1	0	-3.22376	1	0	1	1	0	2	3	0
0	2	0	0	1	-3.22376	1	0	0	1	0	2	3	0
0	2	0	0	1	-3.22376	1	0	0	1	0	1	3	0
0	2	0	0	0	-3.22376	1	0	0	1		2	3	0
0	2	0	0	0	-3.22376	1	0	0	0		0	3	0
0	2	1	0	0	-3.22376	1	0	0	0	0	1	3	0
0	2	1	2	0	-3.22376	1	1	0	0	0	1	3	0
0	2	0	1	0	-3.22376	1	0	0	1	0	2	3	0
0	2	0	1	0	-3.22376	0	0	0	1	1	0	3	1
0	2	1	0	1	-3.22344	1	0	0	1	0	1	3	0
0	2	1	0	0	-3.22344	0	0	0	0	0	1	3	1
1	2	1	0	1	-3.22344	0	0	0	0	0	0	3	1
0	2	1	1	1	-3.22064	1	1	0	1	1	2	3	1
0	2	1	1	0	-3.22	1	1	0	1	1	0	3	0
1	2	0	0	0	-3.22	1	0	0	1	1	1	3	0
0	1	0	0	0	-3.21699	0	0	0	0	0	1	3	0
0	2	0	0	1	-3.20629	1	0	0	1	0	0	3	2
0	2	0	1	0	-3.19144	0	0	0	1	1	0	3	1
1	2	1	1	1	-3.19144	0	0	0	1	0	0	3	0
0	2	1	0	0	-3.17581	1	0	0	1	1	0	3	0
0	2	0	1	0	-3.17148	0	1	0	1	0	0	3	1
0	2	0	0	0	-3.15179	0	0	0	1	0	1	3	0
0	2	0	0	1	-3.15179	0	0	0	1	1	0	3	0
0	2	0	1	1	-3.15179	1	1	1	1	0	1	3	0
0	2	1	0	1	-3.13787	0	1	0	0	0	0	3	0
0	2	0	0	0	-3.13468	0	0	0	1	0	1	3	0
0	2	0	0	0	-3.11386	0	0	0	1	0	0	3	1
0	2	0	0	0	-3.10841	0	0	1	0	0	1	3	0
0	2	0	1	1	-3.10841	1	0	0	1	0	0	3	0
0	2	1	1	0	-3.10841	0	1	0	0	0	0	3	0
0	2	0	1	0	-3.10841	0	0	0	1	0	0	3	0
0	2	0	1	0	-3.10841	1	1	1	1	0	2	3	0
0	2	0	0	0	-3.10841	1	0	0	0	0	0	3	0
0	2	0	1	0	-3.10841	0	0	0	0	0	0	3	0
1	2	1	1	0	-3.10841	0	1	0	0	0	0	3	0
1	2	0	2	0	-3.10841	0	1	1	1	0	0	3	0
1	2	1	1	1	-3.10841	1	1	0	0	0	1	3	0
1	2	0	0	0	-3.10841	0	0	1	0	0	0	3	0
1	2	1	0	0	-3.10587	1	0	1	1	0	1	3	0
1	1	0	0	0	-3.10475	0	0	0	0	0	2	3	0
0	2	0	1	0	-3.09406	0	0	0	1	1	0	3	0
0	2	0	1	0	-3.09406	1	0	0	1	0	2	3	0
0	2	0	0	1	-3.08265	0	0	0	0	0	2	3	0
0	2	0	0	1	-3.07921	0	0	0	0	0	0	3	0
0	2	0	0	0	-3.07921	0	0	0	0	0	0	3	0
0	2	1	1	0	-3.07921	0	1	0	1	0	1	3	0
1	2	1	1	0	-3.07921	1	1	0	1	0	2	3	0
0	2	0	0	0	-3.06357	0	0	0	1	0	0	3	0
0	2	1	2	0	-3.06357	1	1	0	1	1	1	3	0
0	2	1	2	0	-3.06357	0	1	0	1	0	0	3	1
0	2	0	1	0	-3.06045	0	0	0	1	0	0	3	0
0	2	0	1	0	-3.06045	0	0	1	1	0	1	3	1
1	2	0	1	0	-3.06045	1	0	0	1	0	1	3	0
0	2	1	0	0	-3.05957	0	0	0	0	0	0	3	0
0	2	0	0	1	-3.05791	0	0	0	1	0	1	3	0
1	2	1	0	1	-3.05791	1	1	0	0	0	0	3	0
0	2	0	0	0	-3.05613	0	0	1	1	0	2	3	0
0	2	1	0	1	-3.02937	0	0	0	0	0	0	3	1
0	2	0	0	0	-3.0287	0	0	0	1	0	0	3	0
1	2	0	0	0	-3.0287	0	0	0	1	0	0	3	0
0	2	0	0	0	-3.00557	0	0	0	1	0	1	3	1
0	2	1	1	0	-3.0036	0	0	1	0	0	1	3	2
0	2	0	0	0	-3.00272	1	0	0	1	0	2	3	0
0	2	0	0	0	-3.00272	0	0	0	1	0	0	3	0
0	2	0	0	1	-2.99396	0	1	1	0	0	0	3	0
0	2	0	0	0	-2.99072	0	0	0	1	1	0	3	0
0	2	0	1	0	-2.99051	1	1	0	1		2	3	0
0	2	0	0	0	-2.99051	0	0	0	0	0	0	3	1
0	2	0	0	0	-2.96479	0	0	0	1	1	0	3	1
0	2	0	1	1	-2.96263	1	0	1	0	0	0	3	1
0	2	0	0	0	-2.95898	0	0	0	0	0	0	3	0
0	2	1	1	1	-2.94822	1	1	1	1	0	1	3	2
0	2	0	0	0	-2.94602	0	0	0	0	0	0	3	0
0	2	0	0	0	-2.94568	0	0	0	1	0	1	3	0
0	2	0	0	1	-2.90229	1	0	1	1	0	2	3	0
0	2	0	1	0	-2.89917	0	0	0	1	0	1	3	0
0	2	0	2	1	-2.89048	1	1	0	1	0	2	3	0
1	2	1	0	1	-2.88482	0	0	0	0	0	0	3	0
0	2	0	0	0	-2.86999	0	0	0	0	0	0	3	0
1	2	0	1	1	-2.86999	0	1	1	0	0	0	3	0
0	2	0	0	0	-2.85001	0	0	0	0	0	0	3	0
1	2	1	0	0	-2.84799	0	0	1	1	1	0	3	0
	2		2	1	-2.84799		1				0	3	2
0	2	0	1	0	-2.84689	0	0	0	0	0	0	3	0
0	2	0	0	1	-2.83998	0	0	0	1	1	0	3	0
0	2	0	0	0	-2.83775	0	1	0	1	1	0	3	1
0	2	0	0	0	-2.83032	1	0	0	1	1	0	3	1
0	2	0	0	1	-2.82928	1	0	0	1	0	0	3	2
0	2	1	0	0	-2.82204	0	0	0	0	0	1	3	0
0	2	0	1	1	-2.802	0	1	0	1	1	2	3	0
0	2	0	0	0	-2.80179	0	0	0	1	0	0	3	2
0	2	1	1	0	-2.80179	0	1	0	0	0	0	3	0
0	2	0	1	0	-2.80179	0	1	0	1	0	0	3	0
0	2	0	0	0	-2.80095	1	0	0	1	0	2	3	0
0	2	0	1	0	-2.7966	1	0	1	1	1	0	3	0
0	2	0	0	0	-2.79453	0	0	0	1	0	0	3	0
0	2	0	0	1	-2.79313	0	0	0	1	0	0	3	2
0	2	0	0	0	-2.78694	1	0	1	1	0	0	3	0
0	2	0	0	0	-2.78694	0	0	0	1	1	0	3	2
0	2	1	1	1	-2.74782	0	1	0	1	1	0	3	1
0	2	0	1	1	-2.74438	1	1	0	1	0	0	3	1
0	2	0	1	1	-2.74438	0	1	1	1	1	0	3	2
0	2	0	1	1	-2.7421	1	1	1	1	0	1	3	1
0	2	0	1	0	-2.73898	0	1	0	1	0	0	3	0
0	2	1	1	0	-2.71357	0	1	0	0	0	0	3	0
1	2	0	0	1	-2.71357	1	0	1	1	0	1	3	0
0	2	1	2	1	-2.71045	1	1	0	0	0	1	3	0
1	2	0	0	0	-2.70586	1	0	1	1	0	0	3	0
0	2	1	0	1	-2.68125	0	0	1	0	0	2	3	0
0	1	0	0	0	-2.67536	0	0	0	1	0	0	3	0
0	2	0	0	0	-2.67036	0	0	0	0	0	0	3	0
0	2	0	2	0	-2.67036	0	0	0	1	1	0	3	0
1	2	1	0	0	-2.66997	0	0	1	1	0	1	3	0
0	2	0	0	0	-2.66129	0	1	0	1	0	0	3	0
0	2	0	1	0	-2.65817	0	0	0	1	0	0	3	0
0	2	0	1	0	-2.63566	1	0	0	0		2	3	0
0	2	0	1	0	-2.63418	0	1	0	1	0	2	3	0
1	2	0	0	0	-2.63214	0	0	0	1	0	0	3	0
0	2	0	1	0	-2.61414	0	0	0	1	1	2	3	0
0	1	1	1	0	-2.59056	1	1	0	1	0	0	3	0
1	2	0	0	0	-2.56028	0	0	0	1	0	0	3	1
1	2	0	0	1	-2.55774	0	0	1	1	0	0	3	0
0	2	0	0	0	-2.48032	1	0	1	1	1	0	3	0
1	2	0	1	1	-2.47597	0	0	1	1	1	1	3	0
0	2	0	2	0	-2.46109	0	1	0	1	1	1	3	1
0	2	0	0	1	-2.46109	0	0	0	1	0	0	3	0
1	2	0	1	0	-2.44974	0	1	0		0	0	3	0
1	2	0	0	0	-2.4414	0	0	0	1	0	1	3	0
1	1	1	0	1	-2.43194	1	0	0	1	1	1	3	1
1	1	1	0	0	-2.43194	0	0	0	1	0	1	3	0
1	2	1	2	1	-2.39443	0	1	1	1	1	0	3	0
1	2	0	0	1	-2.39443	0	0	1	0	0	0	3	0
1	2	1	2	0	-2.3921	0	1	0	1	1	0	3	0
0	2	0	1	0	-2.38897	0	0	1	1	1	0	3	0
0	2	0	1	0	-2.36374	0	1	0	1	1	0	3	0
0	2	1	0	1	-2.36152	0	0	0	0	0	0	3	0
0	2	1	0	1	-2.3598	1	1	0	0	0	2	3	1
1	1	0	1	1	-2.3598	1	1	1	1	1	0	3	0
1	2	0	0	1	-2.35644	1	0	1	1	1	0	3	1
0	1	0	0	1	-2.34739	0	0	0	1	0	0	3	2
1	2	0	0	1	-2.33669	0	0	0	0	0	1	3	1
0	2	0	1	0	-2.32917	1	1	0	1	0	0	3	0
1	1	0	0	1	-2.32917	1	0	0	1	0	0	3	0
1	2	1	1	1	-2.30621	1	1	1	1	1	0	3	0
1	2	1	1	0	-2.2864	0	1	1	1	1	1	3	0
1	1	1	0	1	-2.28564	0	0	0	0	0	1	3	0
0	2	0	1	1	-2.28214	0	0	1	1	1	1	3	0
1	1	0	1	0	-2.27674	0	0	0	1	0	0	3	0
1	2	1	0	0	-2.27674	1	0	0	1	0	0	3	0
1	2	0	0	0	-2.27674	0	0	0	1	0	0	3	0
0	2	1	1	0	-2.2724	0	0	1	1	1	0	3	1
0	2	0	1	0	-2.26037	0	0	0	1	0	0	3	0
0	2	1	1	0	-2.25366	1	1	1	1	0	0	3	0
0	2	0	0	0	-2.25366	1	0	1	0	0	2	3	0
0	2	0	1	0	-2.25366	0	1	1	1	1	0	3	0
0	2	1	2	0	-2.24617	0	1	0	1	1	0	3	2
1	2	1	1	0	-2.16016	0	0	1	1	1	1	3	0
0	2	0	0	1	-2.13962	1	0	0	1	0	0	3	0
0	2	1	2	0	-2.13962	0	1	1	1	1	1	3	0
1	2	1	1	1	-2.13312	0	1	1	1	1	1	3	0
0	2	1	2	0	-2.05009	0	1	0	1	0	1	3	0
0	2	0	0	0	-2.04233	0	0	1	1	1	0	3	2
0	2	0	1	1	-2.0004	0	0	1	0	0	0	3	0
1	2	0	2	0	-2.0004	0	1	1	1	0	0	3	0
0	2	0	0	0	-1.97376	0	0	0	1	1	0	3	0
1	2	0	0	0	-1.96067	0	0	0	1	1	0	3	1
0	2	0	1	1	-1.9562	1	1	1	1	1	2	3	0
1	2	1	0	0	-1.93433	0	1	0	1	1	0	3	0
0	1	0	1	0	-1.92175	0	0	0	0	0	1	3	0
0	1	1	1	0	-1.92175	0	0	0	1	1	1	3	0
0	2	0	0	0	-1.91296	0	0	0	1	1	0	3	0
0	1	1	2	1	-1.90616	1	1	1	1	1	0	3	2
1	1	1	1	0	-1.88382	0	1	0	1	0	1	3	0
	2	0	0	1	-1.86834	0	0	0	0	0	1	3	0
0	2	1	0	0	-1.85096	1	0	0	0	0	0	3	0
0	1	0	2	0	-1.84085	1	1	0	1	0	2	3	0
0	2	0	0	0	-1.83869	0	0	0	0	0	0	3	0
0	2	1	2	0	-1.81561	0	1	1	0	0	2	3	0
0	1	0	2	0	-1.81167	0	1	0	1	0	0	3	0
0	1	0	1	0	-1.81167	0	0	0	1	0	1	3	0
1	1	0	2	0	-1.81167	1	0	0	1	0	0	3	0
1	2	1	1	1	-1.81167	0	1	0	1	1	0	3	0
0	2	1	0	0	-1.75056	1	1	0	0	0	2	3	0
0	2	0	0	0	-1.74842	0	0	0	1	0	0	3	1
0	2	1	1	0	-1.73412	1	1	0	0	0	2	3	0
0	2	0	0	1	-1.72862	1	0	0	1	0	0	3	0
1	2	1	0	1	-1.72862	1	0	1	0	0	1	3	2
0	1	0	0	0	-1.71791	0	0	1	1	1	0	3	1
1	1	0	0	1	-1.71251	0	0	0	1	0	1	3	1
0	1	0	0	1	-1.67508	0	0	1	1	1	0	3	0
1	1	1	1	1	-1.6703	0	0	1	1	1	1	3	2
0	1	1	0	0	-1.66584	0	0	0	0	0	2	3	0
0	1	0	2	1	-1.64348	1	1	1	1	0	1	3	0
0	2	0	0	1	-1.62005	0	0	0	1	1	0	3	0
1	2	0	1	0	-1.60783	0	1	0	1	0	0	3	0
1	2	1	2	1	-1.60637	0	1	1	1	0	2	3	0
0	1	0	1	1	-1.60244	0	0	1	1	0	1	3	0
1	1	0	1	1	-1.60244	0	0		1	1	2	3	0
1	2	0	0	1	-1.60244	1	0	1	1	0	0	3	0
	2		0	0	-1.57181		0				0	3	0
1	1	0	2	0	-1.56235	0	1	0	1	0	1	3	0
1	2	0	0	1	-1.53154	0	0	1	1	0	1	3	0
0	2	0	0	0	-1.51249	0	0	0	1	1	0	3	1
0	1	0	2	1	-1.48586	0	1	0	1	1	2	3	0
1	1	1	0	1	-1.48586	0	0	0	0	0	0	3	0
1	1	1	2	1	-1.46173	0	1	1	1	0	1	3	0
0	2	0	1	0	-1.38412	0	1	1	1	1	1	3	0
0	1	0	1	1	-1.37802	0	1	0	1	0	0	3	0
0	2	0	1	0	-1.37802	1	1	0	1	1	1	3	0
1	2	1	2	1	-1.37802	0	1	0	1	1	2	3	0
0	1	0	2	0	-1.37362	1	1	0	1	0	2	3	0
0	2	0	0	1	-1.35046	1	0	0	1	0	1	3	1
0	1	0	2	1	-1.34906	0	1	1	0	0	2	3	0
1	1	1	2	1	-1.3474	0	1	1	1	1	1	3	1
0	1	0	2	0	-1.34443	0	1	1	0	0	0	3	0
0	1	0	0	0	-1.32851	1	0	0	1	1	0	3	0
0	2	1	0	1	-1.29939	0	0	0	0	0	0	3	2
0	1	1	2	0	-1.27189	0	1	1	1	1	0	3	0
0	2	0	0	1	-1.25704	0	0	0	0	0	0	3	0
0	1	0	1	1	-1.24435	1	1	0	1	0	2	3	0
1	1	1	2	0	-1.2344	0	1	1	1	1	1	3	0
0	1	1	0	0	-1.18986	1	0	0	1	1	0	3	0
0	1	1	1	1	-1.16439	0	1	0	0	0	1	3	0
0	1	1	0	0	-1.16439	0	0	0	1	1	0	3	1
1	2	0	0	1	-1.0645	0	0	1	0	0	0	3	1
0	2	0	0	1	-1.06265	1	0	1	1	0	2	3	0
1	1	1	2	1	-1.05946	0	1	1	1	1	0	3	1
0	1	1	1	0	-1.05215	0	0	0	1	0	1	3	1
0	1	0	1	0	-1.05215	0	0	0	1	0	2	3	0
1	1	0	0	0	-1.05215	0	0	0	0	0	0	3	1
0	2	0	0	0	-1.0397	0	0	0	1	0	0	3	0
1	1	1	1	1	-0.949436	0	1	0	0	0	0	3	0
0	1	0	2	0	-0.949382	0	1	0	1	1	1	3	1
1	2	1	1	0	-0.948577	1	1	0	1	1	2	3	1
0	1	1	1	1	-0.944231	0	1	1	0	0	0	3	1
0	2	1	0	1	-0.942132	0	1	0	1	1	1	3	1
0	1	1	2	1	-0.914822	0	1	0	1	1	2	3	0
0	1	0	2	0	-0.912932	0	1	0	1	1	2	3	0
1	1	0	2	1	-0.859075	1	1	0	1	0	2	3	0
0	2	0	0	0	-0.851421	0	1	0	1	0	0	3	0
0	2	1	1	1	-0.829899	0	1	0	1	1	0	3	0
1	1	1	1	1	-0.829899	0	0	1	1	0	0	3	0
0	1	1	1	1	-0.800932	0	1	1	1	0	2	3	0
1	2	0	1	0	-0.746843	0	0	0	1	1	0	3	0
0	1	0	2	0	-0.697354	0	1	0	1	0	2	3	0
0	2	0	1	0	-0.695465	0	1	0	1	0	0	3	0
0	2	0	1	1	-0.692776	1	0	0	1	0	0	3	0
0	2	0	1	1	-0.692776	0	0	0	1	1	0	3	0
0	2	1	2	1	-0.690157	1	1	0	0	0	2	3	0
1	1	1	2	0	-0.679662	0	1	0	0	0	1	3	0
0	2	1	1	0	-0.626448	0	1	0	1	0	0	3	2
0	1	1	1	0	-0.623565	0	1	0	1	0	0	3	0
1	1	0	1	0	-0.623565	0	0	0	1	0	0	3	1
0	1	0	2	0	-0.620661	0	1	0	1	1	0	3	0
1	1	0	2	0	-0.620661	0	1	1	1		0	3	1
1	2	1	2	1	-0.620661	1	1	0	1	1	0	3	1
0	2	0	0	0	-0.615116	0	0	1	1	0	0	3	1
1	1	0	2	0	-0.614298	0	1	0	1	1	2	3	0
0	2	0	1	1	-0.614245	0		1	0	0	1	3	2
1	2	1	2	0	-0.607767	0	1	0	1	1	0	3	1
0	1	0	2	0	-0.598519	1	1	0	1	0	2	3	1
0	1	1	1	1	-0.591694	0	1	1	1	1	2	3	1
0	1	1	2	1	-0.583233	0	1	0	0	0	0	3	0
0	2	0	0	0	-0.541846	0	0	0	1	0	0	3	2
0	1	1	1	0	-0.508429	0	1	0	1	1	1	3	0
0	1	1	2	0	-0.508429	0	1	0	1	1	1	3	0
1	1	1	2	1	-0.508429	1	1	1	1	0	1	3	1
1	2	1	2	1	-0.49359	1	1	1	1	1	1	3	2
0	2	1	1	1	-0.479461	1	1	1	1	1	0	3	0
1	2	0	1	0	-0.373995	0	1	0	1	1	1	3	1
0	1	0	1	0	-0.259305	0	0	1	1	1	0	3	1
1	2	1	0	0	-0.22658	1	0	1	1	1	1	3	0
0	2	0	0	0	-0.18777	1	0	0	0		2	3	0
0	2	1	1	1	-0.154132	1	0	0	0	0	0	3	1
0	1	0	2	1	-0.07984	1	0	0	1	1	0	3	0
0	1	0	1	1	-0.07984	0	1	0	1	0	0	3	0
0	2	1	1	1	-0.07984	1	1	0	1	1	2	3	1
1	2	0	1	1	-0.07984	1	0	1	1	0	0	3	0
0	1	1	2	1	-0.0790349	0	1	1	1	0	0	3	0
1	1	1	2	1	-0.0479687	0	1	1	1	1	1	3	0
0	1	1	2	1	-0.0258265	0	1	0	1	1	1	3	2
0	1	0	2	1	0.0323926	1	1	0	1	0	2	3	0
0	1	1	1	0	0.154694	1	1	0	1	0	0	3	0
0	1	0	1	0	0.18263	0	0	0	1	0	0	3	0
0	1	1	2	0	0.185533	0	1	0	1	1	0	3	0
0	1	1	1	1	0.261829	1	1	0	1	1	2	3	0
0	1	0	2	1	0.267209	1	1	0	1	0	2	3	0
0	2	0	1	0	0.283615	1	1	1	1	0	2	3	0
1	1	1	2	1	0.283615	0	1	0	1	0	1	3	0
1	1	1	2	0	0.379442	0	1	0	1	1	2	3	0
0	1	1	1	1	0.382346	0	1	1	1	0	0	3	0
0	1	0	1	0	0.418342	0	1	0	1	1	2	3	0
0	1	0	1	1	0.461787	0	0	0	1	1	2	3	0
0	1	0	2	0	0.493658	0	1	0	1	0	2	3	0
1	1	0	2	0	0.517899	0	1	0	1	1	1	3	0
1	2	1	2	0	0.564452	0	1	1	1	0	2	3	0
0	1	0	2	0	0.591584	1	1	0	1	0	2	3	0
0	1	1	1	1	0.602987	1	0	1	0		2	3	1
0	1	0	1	1	0.604392	0	1	0	1	0	0	3	0
0	2	1	2	0	0.605085	0	0	0	1	1	0	3	1
1	1	0	1	1	0.614122	0	1	0	1	0	0	3	0
0	1	1	2	1	0.623294	0	1	0	1	0	0	3	0
1	1	1	1	0	0.64309	0	1	0	1	1	1	3	0
0	1	1	2	1	0.750731	0	1	1	1	1	2	3	0
0	2	0	2	0	0.76442	0	1	0	1	0	1	3	1
0	1	0	2	1	0.945309	0	1	0	1	0	0	3	0
0	1	1	2	1	0.955039	1	1	0	1	1	0	3	0
1	2	0	1	1	1.01765	0	1	1	1	0	1	3	0
	1		2	1	1.07631		1					3	0
0	1	0	1	1	1.15936	1	1	1	1	0	2	3	0
1	1	0	1	1	1.16428	1	1	1	1	0	1	3	0
0	1	1	2	1	1.39568	0	1	0	1	1	2	3	0
1	1	0	1	1	1.47062	0	1	0	1	1	0	3	0
0	2	1	1	1	1.61982	1	1	0	1	0	2	3	1
0	2	1	1	0	1.6461	0	1	1	1	1	0	3	1
1	1	1	2	1	1.70099	1	1	0	1	1	1	3	0
1	1	1	2	1	1.72996	1	1	0	1	1	1	3	0
1	2	1	2	1	1.84028	1	1	1	1	1	0	3	0
0	1	1	2	1	1.85533	1	0	1	0	0	2	3	0
1	1	1	2	1	1.85533	0	1	1	1	1	2	3	0
1	1	0	2	1	1.96317	0	1	1	1	0	1	3	0
1	1	1	2	1	1.96757	1	1	0	1	1	2	3	1
0	1	1	2	1	1.96837	0	1	0	1	0	0	3	0
0	1	1	1	1	2.15675	1	1	0	0	0	2	3	0
1	1	1	2	1	2.18772	0	1	0	1	1	0	3	0
0	1	0	2	1	2.41415	1	1	0	1	1	2	3	0
0	1	0	1	0	2.42201	1	1	1	0		2	3	0
0	1	1	2	1	2.5038	0	1	1	1	1	0	3	0
0	1	1	1	0	2.73808	0	1	1	1	1	2	3	0
0	1	1	2	1	2.93386	1	1	1	1	1	1	3	1
0	1	0	2	1	2.96573	0	1	0	1	1	1	3	0
1	1	1	2	0	3.2789	0	1	0	1	1	2	3	2
0	1		2	0	3.50655	0	1	0	1	1	2	3	1
1	2	1	2	1	3.61879	0	1	0	1	1	1	3	2
0	1	0	2	1	3.93486	0	1	1	1	1	0	3	1
1	1	1	2	1	4.64579	0	1	0	1	1	1	3	2
0	2	0	1	1		0	1	1	1	0	1	2	1
0	2	1	1	1		0	1	0	1	0	0	2	0
0	2	1	0	1		0	0	1	1	0	2	2	2
0	2	1	0	1		0	0	1	1	0	0	2	1
0	1	1	1	0		0	1	0	1	1	0	2	1
0	1	1	2	1		0	0	0	1	1	1	2	1
1	2	1	2			1	0	0	1	0	2	2	1
1	1	1	2	1		0	1	1	1	1	1	2	1
1	1	0	2	1		1	1	1	1		2	2	0
1	1	1	1	1		0	1	1	1	0	0	2	1
1	2	1	0	1		0	0	0	1	0	1	2	0
1	2	1	1	0		1	1	1	1	1	0	2	2
1	2	1	0	1	-3.83184	0	0	1	1	0	1	2	0
1	2	1	0	0	-3.83184	0	0	1	1	0	0	2	0
1	2	0	1	1	-3.83184	0	1	1	1	1	1	2	1
1	2	1	0	0	-3.77734	0	0	1	1	0	0	2	1
0	2	1	1	0	-3.71961	1	0	1	1	0	2	2	1
0	2	1	1	0	-3.71961		0	0	1	0	2	2	0
0	2	1	0	1	-3.71961	0	0	0	1	0	0	2	2
0	2	1	1	0	-3.71961	0	1	1	1	1	0	2	0
0	2	1	0	0	-3.71961	0	1	1	1	0	0	2	0
0	2	1	0	0	-3.71961	0	0	1	1	0	0	2	0
0	2	1	0	0	-3.71961	1	0	1	1	0	2	2	0
0	2	1	1	0	-3.71961	1	0	0	1	0	0	2	0
1	2	0	0	0	-3.71961	0	1	1	0	0	1	2	0
1	2	1	0	0	-3.71961	1	0	1	0	0	0	2	0
1	2	1	0	0	-3.71961	1	0	1	1	0	0	2	1
1	1	1	0	0	-3.71961	1	0	1	1	0	1	2	2
1	2	1	0	0	-3.71961	1	0	0	1	1	0	2	0
1	2	1	0	0	-3.71961		0	1	1	0	0	2	0
1	2	1	0	0	-3.71961	0	0	1	0	0	1	2	0
1	2	1	2	0	-3.71961	1	0	1	1	1	0	2	0
1	2	1	1	0	-3.71961	1	0	1	1	0	0	2	0
1	2	1	0	0	-3.71961	1	0	0	0	0	0	2	0
1	2	1	0	0	-3.71961	0	0	1	1	0	0	2	1
0	2	0	0	0	-3.62061		0	0	0	0	0	2	1
0	2	0	0	0	-3.62061	0	0	0	0	0	0	2	0
0	2	1	0	1	-3.61495	1	0	0	1	0	0	2	1
0	2	1	0	0	-3.60425	1	0	0	1	0	1	2	0
0	2	0	0	0	-3.56611	0	0	0	0	0	2	2	0
1	2	1	0	0	-3.56611	0	0	1	1	0	0	2	2
1	2	1	0	1	-3.55722	1	0	0	0	0	1	2	0
0	2	1	1	1	-3.53957	0	1	0	1	0	2	2	1
0	2	0	0	0	-3.53957	0	0	1	1	1	1	2	0
0	2	0	0	1	-3.53957	0	0	1	1	1	0	2	0
0	2	1	1	0	-3.53957	1	1	1	1	0	0	2	1
1	2	1	1	0	-3.53957	1	1	1	1	0	1	2	1
0	2	0	1	0	-3.51603	1	1	1	1	1	1	2	0
1	2	1	0	0	-3.51603	1	0	1	1	0	1	2	0
1	2	1	0	0	-3.51037	1	0	1	1	0	0	2	1
0	2	0	0	0	-3.50838	0	0	0	1	0		2	2
0	2	0	1	0	-3.50838	1	1	1	1		2	2	0
0	1	0	0	1	-3.50838	1	0	0		0	0	2	2
0	2	1	0	1	-3.50838	0	0	1	1	0	0	2	0
0	2	1	1	0	-3.50838	0	1	1	1	0	0	2	2
0	2	1	0	1	-3.50838	0	0	1	1	0	1	2	0
1	1	1	0	0	-3.50838	1	0	1	1	0	0	2	1
1	1	1	0	0	-3.50838	0	0	1	1	0	0	2	1
1	2	1	0	0	-3.50838	0	0	1	1	0	1	2	0
1	2	1	0	0	-3.50838	1	1	1	1	0	0	2	1
1	2	1	0	0	-3.50838	0	0	1	1	0	0	2	1
1	2	1	0	0	-3.50838	1	0	1	1	0	1	2	2
1	2	1	0	1	-3.50838	1	0	1	1	0	1	2	0
1	2	1	1	1	-3.50838	1	1	1	1	0	0	2	0
1	2	1	1	1	-3.50838	1	1	0	1	1	1	2	1
1	2	1	0	0	-3.45076	1	0	0	1	0	1	2	0
0	2	0	0	0	-3.42734		0	1	1	0	2	2	0
0	2	0	0	0	-3.42734	1	1	1	0	0	2	2	0
0	2	0	0	0	-3.42734	1	0	1	0	0	0	2	0
0	2	0	0	0	-3.42734	0	0	1	0	0	0	2	0
0	2	0	1	0	-3.42734	1	0	1	1	0	1	2	0
0	2	0	0	0	-3.42734	1	0	1	0	0	0	2	0
0	2	1	0	1	-3.42734	1	0	0	1	0	0	2	0
0	2	1	0	0	-3.42734	0	0	0	1	0	1	2	0
0	2	0	0	0	-3.42734	0	0	1	1	0	0	2	2
0	2	0	1	0	-3.42734	1	0	0	0	0	2	2	0
0	2	1	0	1	-3.42734	1	0	0	1	0	2	2	0
1	2	1	1	0	-3.42734	0	0	0	0	0	0	2	0
	2		0	0	-3.42734		0				0	2	1
1	2	1	0		-3.40353	1	0	0	1		2	2	1
1	2	0	0	0	-3.40068	1	0	1	0	0	0	2	0
0	2	0	0	0	-3.39814	1	0	1	1	1	0	2	0
1	2	0	1	0	-3.39814	1	0	1	1	1	1	2	1
1	2	1	0	0	-3.39814	0	0	1	1	1	0	2	0
0	2	1	0	1	-3.39302	0		0	1	0	0	2	0
0	2	1	1	0	-3.39302	0	0	0	0	0	0	2	1
1	1	1	1	0	-3.39302	0	1	0	1	1	0	2	2
1	2	1	1	0	-3.39302	1	1	1	1	0	1	2	2
0	2	1	0	0	-3.35017	0	0	0	1	0	0	2	2
1	2	1	0	0	-3.34599	1	0	1	1	1	1	2	2
0	2	0	0	1	-3.32834	1	0	1	1	1	0	2	0
1	2	1	0	1	-3.32834	1	0	0	1	0	0	2	0
1	2	1	0	0	-3.32834	0	0	0	1	0	0	2	0
0	2	1	1	1	-3.32165	1	0	0	0	0	0	2	1
1	2	1	1	0	-3.32165	0	1	0	0	0	0	2	1
1	2	1	1	0	-3.31198	1	1	1	1	0	0	2	0
1	2	1	0	0	-3.3068	0	0	0	0	0	1	2	1
1	2	1	0	0	-3.29914	1	0	1	1	0	0	2	1
0	2	0	1	0	-3.26494	0	1	1	1	0	2	2	0
0	2	1	0	0	-3.26494		0	0	0	0	2	2	1
1	2	1	0	0	-3.24464	0	0	1	1	0	0	2	1
0	2	0	0	0	-3.22376	1	0		1	0	0	2	1
0	2	0	1	0	-3.22376	0	1	1	0	0	1	2	1
0	2	1	1	1	-3.22376	1	1	0	1	0	0	2	1
1	2	0	0	0	-3.22376	0	0	1	1	1	2	2	1
0	2	0	0	0	-3.2181	0	0	1	1	0	0	2	0
0	2	0	1	1	-3.2181	1	1	1	1	1	1	2	1
1	2	0	0	0	-3.2181	0	0	1	0	0	0	2	0
1	2	0	1	0	-3.2181	1	0	1	1	1	0	2	0
0	2	1	0	0	-3.21611	0	0	1	1	1	0	2	1
0	2	1	0	0	-3.21611	1	0	0	0	0	0	2	2
0	2	1	0	0	-3.21611	0	1	0	1	1	0	2	0
0	2	1	2	1	-3.21611	1	0	1	1	0	2	2	0
0	2	0	0	1	-3.21611	1	0	1	1	0	2	2	0
0	1	1	1	1	-3.21611	1	0	1	1	0	0	2	0
0	1	0	0	0	-3.21611	1	0	1	1	0	2	2	0
0	2	0	0	0	-3.21611	0	0	0	1	1	0	2	0
0	2	0	0	0	-3.21611	1	0	1	1	0	2	2	0
0	2	1	1	1	-3.21611	0	0	0	1		1	2	1
0	2	0	0	0	-3.21611	1	0	1	0	0	0	2	0
0	2	0	1	1	-3.21611	0	1	1	1	0	0	2	0
0	2	1	0	1	-3.21611	1	0	0	0	0	2	2	1
0	2	1	0	1	-3.21611	1	0	0	0	0	2	2	1
0	2	1	2	1	-3.21611	1	1	0	1	0	1	2	1
0	2	1	1	0	-3.21611	0	0	1	1	0	1	2	0
0	2	1	1	1	-3.21611	1	0	0	1	0	2	2	0
1	2	0	1	0	-3.21611	1	0	1	1	1	0	2	0
1	2	1	0	0	-3.21611	0	1	0	1	1	0	2	0
1	2	0	1	0	-3.21611	1	1	1	1	1	0	2	0
1	2	0	2	1	-3.21611	1	1	1	1	1	0	2	1
1	2	1	0	0	-3.21611	1	0	1	0	0	0	2	0
1	2	0	0	0	-3.21611	0	0	1	0	0	1	2	0
1	2	0	2	0	-3.21611	0	1	1	1	1	1	2	1
1	2	0	0	0	-3.21611	1	0	1	0	0	0	2	0
1	2	1	1	1	-3.21611	0	0	1	1	0	0	2	0
0	1	1	0	0	-3.21299	1	0	0	1	0	0	2	0
1	2	1	1	0	-3.20941	0	0	0	1	1	0	2	2
1	1	0	0	0	-3.20941	1	0	1	1	1	0	2	0
1	2	1	1	0	-3.20941	1	1	1	1	1	2	2	1
0	2	1	0	0	-3.18691	0	0	1	1	0	1	2	1
0	2	0	0	0	-3.18691	1	0	1	1	0	2	2	0
0	2	0	0	0	-3.18691	1	0	1	0		2	2	0
0	2	1	0	1	-3.18691	1	0	0	0		1	2	0
1	2	0	1	1	-3.18691	1	1	1	1	0	0	2	0
1	2	1	0	1	-3.18691	1	0	0	0	0	0	2	0
1	2	1	0	1	-3.18691	1	1	1	1	0	0	2	2
1	1	1	1	0	-3.16226	1	1	1	1	0	0	2
0	2	0	0	0	-3.11042		0	1	1	1	1	2	0
1	2	1	0	0	-3.11042	0	0	1	1	0	1	2	0
1	2	1	0	0	-3.11042	1	0	1	1	1	0	2	1
1	2	0	0	1	-3.11042	0	0	0	1	0	0	2	0
0	1	0	1	1	-3.10841	1	1		1	1	1	2	2
0	2	0	1	0	-3.10841	0	0	1	1	1	0	2	2
0	2	0	0	0	-3.10841	1	0	1	1	0	0	2	2
1	1	1	0	0	-3.10841	0	1	1	1	0	0	2	0
1	1	1	1	1	-3.10841	0	0	1	1	0	0	2	1
1	2	1	0	0	-3.10587	1	0	1	1	1	2	2	0
0	2	0	0	0	-3.10274	0	0	1	1	0	0	2	0
0	2	1	1	0	-3.10075	0	0	0	1	0	0	2	1
0	2	0	1	0	-3.10075	1	0	1	0	0	1	2	0
0	1	1	0	1	-3.10075	1	0	0	1	0	0	2	0
0	1	1	1	0	-3.10075	1	0	1	1	0	1	2	1
1	2	0	1	1	-3.10075	0	1	1	1	0	2	2	2
1	2	1	1	0	-3.10075	0	1	1	1	0	1	2	2
1	2	1	0	0	-3.10075	1	0	0	1	0	0	2	0
1	2	1	1	0	-3.10075	0	1	0	1	1	1	2	0
1	2	0	1	1	-3.10075	1	0	1	1	1	0	2	0
1	1	1	1	1	-3.07249	1	0	1	1	0	1	2	1
1	1	1	0	1	-3.07249	0	1	1	1	0	0	2	1
0	2	0	0	0	-3.06137	1	0	1	1	0	0	2	0
1	2	1	0	0	-3.05613	0	0	1	1	1	0	2	0
0	2	1	0	0	-3.05372	0	0	0	1	1	0	2	2
1	2	0	0	0	-3.05372	1	0	1	0	0	1	2	0
1	2	1	0	1	-3.01452	0	0	0	1	0	0	2	0
1	2	0	1	0	-3.00584	1	1	0	1	0	1	2	0
0	2	1	0	0	-3.00017	0	1	1	0	0	0	2	0
1	2	1	1	0	-3.00017	1	0	1	1	0	0	2	1
1	2	1	1	1	-3.00017	1	1	1	1	0	0	2	2
0	1	1	0	1	-2.99818	1	1		1	0	0	2	1
0	2	0	0	1	-2.99818	1	0	0	1	0	0	2	1
1	1	1	2	1	-2.99818	1	1	1	1	1	1	2	0
1	2	1	0	0	-2.99818	0	0	1	1	0	0	2	2
1	2	1	1	0	-2.99818	0	1	1	1	1	2	2	0
1	2	1	1	0	-2.98535	1	1	1	1	1	1	2	0
1	2	1	1	0	-2.98535	1	1	1	1	0	1	2	0
0	2	0	2	1	-2.91714	0	1	1	1	0	1	2	0
0	2	0	0	0	-2.91714	0	0	1	0	0	1	2	0
1	2	1	1	0	-2.91714	0	1	1	1	1	1	2	1
0	2	0	1	0	-2.90229	1	1	1	1	0	0	2	0
0	2	0	1	1	-2.90229	0	1	1	1	0	0	2	2
1	2	1	1	1	-2.90229	1	1	1	1		2	2	2
1	2	1	2	1	-2.89853	0	1	1	1	0	1	2	2
0	2	1	1	0	-2.89464	0	1	0	1	0	0	2	0
1	2	0	0	0	-2.89464	1	0	1	0	0	2	2	0
1	2	1	0	0	-2.89464	0	0	1	1	0	0	2	0
1	2	1	0	0	-2.89464	1	1	1	1	0	1	2	1
1	1	1	0	0	-2.89464	1	0	0	1	0	0	2	0
0	2	1	0	1	-2.89048	0	0	0	1	1	2	2	0
0	2	0	1	0	-2.88794	1	0	1	1	1	2	2	0
0	2	1	0	0	-2.88794	0	0	1	1	0	0	2	0
1	1	1	0	1	-2.88283	1	0	1	1	0	0	2	1
0	2	1	0	0	-2.87921	1	0	1	0	0	0	2	0
0	2	0	0	0	-2.86999	1	0	1	0	0	0	2	0
0	1	1	1	0	-2.86999	0	0	0	1	1	1	2	1
1	1	1	0	0	-2.86999	0	0	1	1		0	2	1
0	2	1	0	1	-2.85001	1	1	0	0	0	1	2	0
0	2	1	0	1	-2.84689	0	0	0		0	0	2	1
1	2	1	1	1	-2.84173	1	0	1	1	1	1	2	2
0	2	1	0	1	-2.83579	1	0	0	0	0	1	2	0
1	2	1	1	1	-2.81815	1	1	1	1	0	0	2	1
1	2	1	2	1	-2.80179	1	1	0	1	0	0	2	1
1	2	1	1	1	-2.7966	1	0	1	1	0	0	2	2
1	2	1	1	0	-2.79659	0	1	0	1	0	2	2	0
0	2	1	1	1	-2.78895	0	1	1	1	0	1	2	2
1	2	1	1	0	-2.78895	1	1	1	1	0	0	2	1
1	2	1	1	1	-2.78895	0	0	1	1	0	0	2	1
1	2	1	1	1	-2.78895	0	1	1	1	0	1	2	1
0	2	1	1	0	-2.78694	0	1	0	1	1	0	2	1
0	2	1	1	0	-2.78022	1	1	1	1	0	0	2	2
1	2	1	1	0	-2.78022	0	0	0	1	0	1	2	1
1	2	0	2	1	-2.78022	0	1	0	1	0	1	2	1
0	2	1	2	1	-2.77928	1	0	1	0	0	0	2	0
1	1	1	1	0	-2.77928	1	1		1	0	1	2	1
0	2	1	1	1	-2.77611	0	1	0	1	0	1	2	1
1	2	1	0	1	-2.77259	0	0	1	1	0	0	2	2
1	2	0	1	1	-2.75867	1	0	0	1	0	1	2	0
0	2	0	0	0	-2.73225	0	0	1	0	0	2	2	0
1	2	1	0	0	-2.73225	0	1	1	1	0	0	2	0
1	2	1	1	1	-2.71357	1	1	1	1	1	1	2	2
0	2	0	0	1	-2.71045	1	0	1	1	1	0	2	0
1	2		2	1	-2.71045	1	1	1	1	1	1	2	1
0	2	0	0	1	-2.7079	1	0	1	1	1	0	2	2
1	2	0	0	0	-2.7079	1	0	0	1	0	0	2	0
0	1	1	0	0	-2.70591	1	0	1	1	0	0	2	2
1	2	1	0	0	-2.70591	1	0	1	1	0	0	2	0
1	2	1	0	1	-2.70591	1	0	1	1	0	0	2	2
1	2	1	0	1	-2.70591	1	0	1	1	0	1	2	2
1	2	1	0	0	-2.70591	0	0	0	1	0	0	2	1
1	2	1	1	0	-2.70591	1	0	1	1	0	0	2	1
0	2	0	1	0	-2.67671	0	1	1	1	1	0	2	1
1	2	1	0	1	-2.67671	1	0	1	1	0	0	2	0
1	2	0	1	1	-2.67671	1	1	0	1	0	2	2	0
1	2	0	1	1	-2.67359	1	1	1	1	1	1	2	1
0	2	0	0	0	-2.66129	1	0	0	0	0	0	2	0
1	2	1	0	0	-2.65575	1	0	1	1	0	1	2	1
1	2	1	1	0	-2.63878	0	1	1	1	1	0	2	0
1	2	1	2	0	-2.63566	0	1	0	1	1	1	2	1
0	1	1	2	0	-2.62333	1	0	0	1	1	0	2	1
1	1	1	1	0	-2.62333	0	1	1	1	1	0	2	2
1	1	1	0	0	-2.62144	0	0	1	1	0	0	2	2
	1		2	1	-2.61802		1					2	0
1	1	0	0	0	-2.61414	1	0	1	1	1	0	2	0
0	2	0	1	0	-2.60107	0	0	1	1	0	0	2	0
1	1	1	0	0	-2.59821	0	0	1	1	0	0	2	0
0	2	0	0	0	-2.59567	1	0	0	0		2	2	0
0	2	0	0	0	-2.59567	0	0	1	1	0	0	2	0
0	2	1	2	0	-2.59567	0	1	1	1	1	1	2	0
0	2	0	1	0	-2.59567	0	0	1	1	0	0	2	0
0	2	0	0	0	-2.59567	0	0	1	1	1	0	2	0
0	2	1	1	1	-2.59567	1	0	0	1	0	1	2	1
1	2	1	1	1	-2.59567	1	0	1	1	0	0	2	1
1	2	1	2	1	-2.59056	0	0	0	1	1	1	2	1
1	1	1	1	1	-2.59056	0	1	1	1	0	1	2	2
1	1	1	2	0	-2.59056	0	1	1	1	1	0	2	0
1	2	0	1	0	-2.59056	0	1	1	1	1	0	2	1
1	2	1	0	0	-2.58037	0	1	1	1	0	0	2	1
0	2	1	0	1	-2.57856	1	0	0	1	0	0	2	2
1	2	1	0	0	-2.57187	0	0	0	0	0	0	2	0
0	2	0	1	0	-2.57098	0	1		0	0	1	2	0
1	2	1	0	0	-2.56136	1	0	1	1	0	0	2	2
1	1	1	1	0	-2.56136	1	1	1	1	0	2	2	0
1	2	1	1	1	-2.56136	1	1	1	1	1	0	2	0
1	2	1	0	1	-2.55819	1	1	1	1	0	0	2	2
0	2	1	0	0	-2.55774	0	0	0	1	0	0	2	1
1	2	0	1	1	-2.52215	1	1	0	1	0	2	2	0
1	2	1	1	1	-2.52076	1	1	1	1	0	1	2	0
0	2	0	0	1	-2.50978	0	0	0	1	0	1	2	0
1	2	0	2	1	-2.50433	1	1	1	1	1	1	2	0
0	2	0	0	1	-2.49668	0	0	1	1	0	2	2	2
1	2	1	1	1	-2.48125	1	1	1	0	0	0	2	0
1	1	0	1	0	-2.48032	1	1	1	1	0	0	2	0
0	2	1	2	1	-2.45874	1	0	0	1	1	1	2	0
0	2	1	0	1	-2.45874	0	0	1	1	0	0	2	2
0	2	1	0	0	-2.45874	1	0	1	0	0	0	2	0
1	2	0	1	1	-2.45874	0	1	1	1	1	0	2	0
1	2	1	0	1	-2.45205	0	0	1	1	0	2	2	2
0	1	1	0	0	-2.44453	1	0	1	1	1	0	2	0
1	2	1	1	1	-2.41125	1	1	0	1	0	2	2	0
1	2	0	1	1	-2.38897	0	1	0	1	1	2	2	1
1	2	1	0	0	-2.38444	1	0	1	1	0	0	2	2
1	2	1	2	1	-2.38444	1	1	1	1	1	1	2	0
1	2	1	1	1	-2.38444	1	1	1	1	0	0	2	1
1	2	0	2	0	-2.38444	1	1	1	1	1	0	2	1
1	2	0	0	0	-2.38444	0	0	1	1	0	0	2	0
1	2	1	1	0	-2.38444	1	0	1	1	0	1	2	1
1	2	1	1	1	-2.38132	1	0	1	1	1	0	2	1
1	2	1	1	1	-2.38132	0	0	1	1	0	0	2	1
1	2	1	1	1	-2.38132	1	1	1	1	0	0	2	0
1	2	1	2	1	-2.38132	1	1	1	1	1	0	2	1
1	2	1	2	1	-2.38132	0	1	1	1	0	0	2	2
1	2	1	1	0	-2.37679	1	0	0	1	1	0	2	0
1	2	1	0	0	-2.36902	1	1	1	1	0	0	2	0
0	2	1	1	0	-2.36152	0	0	0	1	0	0	2	0
1	2	1	0	0	-2.36064	1	0	1	1	0	0	2	1
0	2	1	1	1	-2.3598	1	1	1	1	1	2	2	0
1	1	1	0	0	-2.3598	1	0	1	1	0	0	2	0
	2	1	0	1	-2.34879	0	0	0	1	0	0	2	1
0	2	1	1	0	-2.34651	1	1	1	1	0	0	2	2
1	1	1	0	0	-2.34339	1	0	1	1	0	0	2	1
1	2	1	1	0	-2.3347	0	1	1	1	1	1	2	0
0	2	0	0	0	-2.28966	1	0	1	0	0	2	2	0
0	2	0	1	1	-2.2796	0	1	0	1	0	1	2	0
1	2	1	2	0	-2.27768	0	1	0	1	1	2	2	2
1	2	1	1	0	-2.27768	1	1	0	1	0	0	2	1
0	2	0	1	1	-2.27002	1	1	1	1		2	2	1
1	1	1	0	0	-2.27002	0	0	1	1	0	0	2	2
1	2	0	1	1	-2.27002	1	1	0	0	0	2	2	0
1	1	1	1	0	-2.26909	0	1	1	1	1	2	2	0
1	2	1	2	0	-2.26909	1	1	1	1	0	2	2	2
1	2	1	1	1	-2.26909	1	0	1	1	1	0	2	1
0	2	0	1	1	-2.24082	0	1	1	1	0	2	2	1
1	2	1	1	0	-2.24082	0	1	1	1		0	2	2
0	1	1	1	0	-2.23766	0	0	0	1	1	1	2	1
0	1	0	1	1	-2.23116	1	1	0	0	0	2	2	2
0	1	1	1	1	-2.23116	1	0	0	1		1	2	0
1	2	1	0	1	-2.18826	0	1	1	1	1	1	2	0
0	2	0	0	1	-2.18589	0	0	1	1	0	2	2	2
1	1	1	0	1	-2.18049	0	0	1	1	0	0	2	0
1	2	0	1	1	-2.16232	1	1	1	1	1	0	2	1
0	2	1	1	0	-2.15978	0	0	1	1	0	0	2	0
1	2	1	1	0	-2.15978	1	1	1	1	1	1	2	0
1	2	0	0	1	-2.15978	0	0	0	0	0	0	2	2
	2		1	1	-2.15978		1					2	1
0	1	1	1	0	-2.15779	1	1	1	1	0	1	2	0
0	1	1	1	1	-2.15467	1	0	0	1	0	0	2	0
1	2	1	0	1	-2.15467	0	0	1	1	0	0	2	1
0	2	0	1	1	-2.15368	0	1	0	1	0	2	2	1
1	2	1	1	1	-2.15368	1	0	1	1	0	1	2	1
1	2	1	1	1	-2.13521	1	0	0	1	0	0	2	2
1	2	1	0	0	-2.12859	0	0	1	1	0	0	2	0
1	2	1	1	1	-2.12663	1	0	0		0	0	2	1
1	2	1	1	0	-2.12547	0	1	1	1	0	1	2	1
1	1	1	1	1	-2.11898	1	1	1	1	0	1	2	2
1	2	1	1	1	-2.11228	1	1		1	0	2	2	1
1	2	1	1	0	-2.11125	0	0	1	1	0	1	2	0
0	1	1	0	1	-2.07332	0	1	0	1	0	0	2	0
0	2	0	0	0	-2.04755	1	0	1	1	0	0	2	0
1	2	1	1	0	-2.04755	1	1	1	1		2	2	0
0	2	0	0	1	-2.04442	1	0	0	1	1	1	2	1
1	1	0	2	1	-2.04243	1	1	1	1		2	2	0
1	1	1	1	1	-2.04243	0	1	1	1	1	1	2	0
1	2	1	0	1	-2.03833	0	1	1	1	1	0	2	0
	1	1	0	0	-2.03833	0	0	1	1	1	0	2	1
0	2	0	0	0	-2.02374	0	0	1	0	0	0	2	0
1	2	1	2	1	-2.00874	1	1	1	1	0	0	2	1
1	2	1	0	1	-1.96663		0	0	1	0	2	2	0
1	2	1	1	0	-1.9562	0	1	1	1	1	0	2	0
0	2	0	1	1	-1.94855	1	0	1	1	0	1	2	0
0	2	1	1	1	-1.94855		0	0	1	0	2	2
1	2	1	0	1	-1.94855	1	0	1	0	0	0	2	0
1	2	1	0	0	-1.94855	1	0	1	1	1	0	2	0
1	1	1	2	1	-1.93219	1	1	1	1	1	1	2	1
0	2	1	1	1	-1.92475	0	0	1	1	0	1	2	0
1	1	0	1	0	-1.90702	1	1	1	1	1	1	2	0
0	2	0	0	0	-1.90513	1	0	1	1		2	2	1
1	1	1	2	0	-1.90106	0	1	1	1	1	1	2	1
1	1	1	2	0	-1.90106	1	1	1	1	0	1	2	0
1	2	1	0	0	-1.84397	1	1	1	1	0	1	2	0
0	1	1	1	1	-1.84085	0	0	1	1	1	1	2	1
0	2	1	0	0	-1.83632	0	0	1	1	0	0	2	1
1	2	1	1	0	-1.83632	1	1	0	1	0	1	2	0
1	2	0	1	0	-1.82001	1	1	1	1	0	0	2	0
1	2	0	1	0	-1.82001	1	1	1	1	1	0	2	0
1	1	0	1	0	-1.82001	1	1	1	1	1	1	2	0
1	2	1	2	1	-1.81898	1	1	1	1	0	0	2	1
1	2	0	2	0	-1.79751	0	1	0	1	1	1	2	1
1	2	1	0	0	-1.77371	0	0	1	1	1	2	2	2
1	2	1	1	1	-1.72102	1	1	1	1	1	0	2	2
1	2	0	1	1	-1.72096	1	1	0	1	1	2	2	0
1	2	1	1	0	-1.72096	0	1	0	1	1	1	2	0
1	2	1	1	0	-1.72096	0	1	1	1	1	1	2	0
0	2	1	1	0	-1.69074	1	0	1	1	0	2	2	0
1	2	1	1	0	-1.68656	0	0	0	1	0	0	2	0
1	2	1	1	0	-1.66154	0	0	1	1	0	1	2	1
0	2	0	2	0	-1.61815	1	1	1	1	0	2	2	0
0	2	0	0	0	-1.60974	1	1	1	1	0	2	2	0
1	2	1	0	0	-1.60878	0	0	1	1	0	0	2	0
1	1	1	1	1	-1.60878	0	0	1	1	1	1	2	1
1	1	1	1	1	-1.60878	0	1	1	1	1	0	2	1
0	2	1	1	1	-1.57085	0	0	0	1	1	2	2	0
0	1	1	0	0	-1.57085	1	0	0	0		2	2	1
1	1	1		0	-1.57085	0	1	1	1	1	0	2	1
1	1	1	1	0	-1.56704	0	1	1	1	1	0	2	1
1	1	1	0	0	-1.5661	0	1	1	1	0	2	2	0
0	2	1	2	1	-1.52024	0	0	1	1	1	0	2	2
0	1	0	1	0	-1.45958	0	1	1	1	0	2	2	0
0	2	1	0	1	-1.36927	1	0	0	1	0	2	2	0
1	2	1	1	0	-1.34009	1	0	1	0	0	0	2	1
1	1	1	1	0	-1.31118	0	1	0	1	1	2	2	0
1	1	1	1	0	-1.29497	1	1	1	1	0	0	2	0
0	2	0	1	0	-1.28731	1	0	1	1	0	0	2	1
1	1	1	1	0	-1.28731	0	1	1	1	0	1	2	2
0	1	0	0	0	-1.27189	1	0	1	0	0	2	2	0
1	1	0	0	0	-1.27189	0	0	1	1	0	0	2	0
1	1	1	2	0	-1.27189	0	1	1	1	1	1	2	0
1	1	0	1	1	-1.24938	1	1	1	1	0	1	2	0
1	2	0	0	1	-1.21621	0	0	1	1	1	0	2	0
1	1	1	2	1	-1.199	0	0	1	1	1	0	2	2
1	1	1	1	0	-1.18055	1	1	1	1	1	0	2	1
1	1	1	2	1	-1.17289	1	0	1	1	0	1	2	1
1	1	1	1	1	-1.17289	0	1	1	1	0	1	2	0
1	1	0	1	0	-1.14755	1	1	1	1	1	0	2	1
1	2	1	2	1	-1.14369	0	1	1	1	0	1	2	1
1	1	1	1	1	-1.14369	1	1	1	1	0	1	2	1
1	2	1	2	0	-1.14369	0	1	1	1	1	0	2	2
0	2	1	0	0	-1.13114	1	0	0	1	0	1	2	0
1	1	1	0	1	-1.09154	0	0	1	1	0	1	2	0
1	1	1	2	0	-1.06831	0	1	1	1	1	0	2	1
1	2	1	1	1	-1.06543	1	1	1	1	1	1	2	1
0	1	0	1	0	-1.06265	1	1	0	0	0	0	2	2
1	2	1	2	1	-1.06066	0	1	1	1	0	1	2	0
1	1	1	2	0	-1.06066	1	1	1	1	1	1	2	1
1	1	1	2	1	-1.06066	0	1	1	1	1	1	2	1
	1		0	1	-1.05684		0					2	0
1	1	1	2	1	-1.05655	1	0	0	1	0	2	2	1
1	2	1	1	1	-1.05655	0	1	1	1	0	1	2	2
0	2	0	1	1	-1.04554	1	1	1	1	0	2	2	2
1	2	0	0	0	-1.03146	0	0	0	1	1	0	2	0
1	2	1	2	1	-0.956813	1	1	1	1	1	0	2	2
1	1	1	1	1	-0.949382	1	1	1	1	0	1	2	0
0	2	1	0	0	-0.945543	1	1	0	0	0	2	2	0
0	2	0	1	0	-0.942132	0	0	0	1	0	0	2	1
1	1	1	1	0	-0.938316	0	0	0	1	0	1	2	1
1	2	1	0	0	-0.928114	0	0	1	1	1	2	2	2
1	2	1	1	1	-0.912932	0	0	1	1	1	1	2	2
1	2	1	1	1	-0.859075	0	1	0	1	0	0	2	1
1	1	1	1	1	-0.859075	0	1	0	1	1	0	2	0
0	1	1	2	1	-0.851421	1	1	1	1	1	1	2	0
1	2	1	2	0	-0.851421	1	1	1	1	0	0	2	1
1	2	1	2	1	-0.851421	1	1	1	1	1	1	2	0
1	1	1	2	0	-0.851421	1	1	1	1	0	1	2	2
1	2	0	1	1	-0.851421	0	0	1	1	1	0	2	0
1	1	1	2	1	-0.851421	0	1	1	1	1	1	2	0
0	1	1	2	1	-0.829899	1	0	1	1	0	2	2	0
1	1	1	2	0	-0.829899	0	0	0	1	0	2	2	1
1	1	1	2	1	-0.829899	1	1	1	1	0	1	2	2
1	1	1	2	0	-0.829899	0	0	0	1	1	1	2	1
1	2	1	1	0	-0.827618	0	1	1	1	1	0	2	2
1	1	1	1	0	-0.800989	1	1	1	1	0	1	2	2
1	2	1	1	1	-0.799272	0	1	1	1	1	0	2	0
1	1	1	2	0	-0.780237	1	1	1	1	0	1	2	0
1	1	1	1	1	-0.756923	1	0	0	1	1	0	2	0
1	1	1	2	1	-0.746843	0	1	1	1	0	1	2	0
1	1	1	2	1	-0.746843	1	1	1	1	1	1	2	0
0	2	0	2	1	-0.739188	0	1	1	1	0	2	2	0
1	2	1	0	1	-0.739188	1	1	0	1	0	0	2	0
1	2	1	1	0	-0.739188	1	1	0	1	0	0	2	0
1	1	1	0	1	-0.739188	1	0	0	1	0	1	2	1
1	1	1	1	0	-0.739188	1	1	1	1	1	2	2	0
1	1	1	2	1	-0.739188	1	0	1	1	0	1	2	1
1	1	1	1	0	-0.707756	1	0	1	1	0	2	2	0
1	2		0	1	-0.695465	1	0	1	1		2	2	0
0	1	1	2	0	-0.62716	1	1	1	1	0	0	2	2
1	2	0	1	1	-0.62095	0	0	0	1	1	1	2	2
1	1	1	2		-0.620661	0	1	1	1	0	0	2	0
1	1	1	1	1	-0.607024	1	1	1	1	1	0	2	0
1	1	1	0	0	-0.606732		0	1	1	1	0	2	1
1	2	1	2	1	-0.515733	0	1	1	1	0	1	2	2
1	1	1	0	0	-0.515733	0	0	1	1	0	0	2	1
1	2	1	2	1	-0.508717	1	1	1	1	1	1	2	1
0	1	0	0	0	-0.508429	1	0	1	1		2	2	1
1	1	0	1	0	-0.508429	1	1	1	1	0	0	2	0
1	1	1	1	1	-0.508429	1	0	1	1	1	0	2	2
0	1	1	1	1	-0.479572	0	1	1	1	0	2	2	1
1	1	1	2	1	-0.477802	1	1	1	1		2	2	0
1	1	1	1	0	-0.458051	1	1	1	1	0	2	2	1
1	1	0	1	0	-0.423999	1	1	1	1	1	1	2	0
1	1	1	2	0	-0.397495	0	1	1	1	1	1	2	2
0	1	1	2	1	-0.396539	1	1	0	1	1	2	2	0
1	1	1	1	0	-0.396539	0	0	0	1	0	1	2	2
1	1	1	2	0	-0.334171	0	1	1	1	1	2	2	0
1	1	1	2	1	-0.289078	0	0	1	1	1	2	2	1
1	1	1	2	1	-0.278728	1	1	1	1	1	0	2	0
1	1	1	2	0	-0.259878	0	1	1	1	1	1	2	2
0	1	1	1	1	-0.234795	1	0	0	0	0	1	2	0
1	1	1	1	1	-0.173321	1	1	0	1	0	1	2	0
1	2	1	2	1	-0.171875	1	1	1	1	1	2	2	0
1	1	1	1	0	-0.166496	0	1	1	1	0	0	2	0
1	1	1	2	1	-0.16578	0	1	1	1	1	1	2	2
1	1	1	2	1	-0.135152	0	1	1	1	0	1	2	0
1	2	1	1	0	-0.07984	1	0	1	1	0	1	2	0
0	1	1	2	0	-0.0371375	0	1	0	1	1	0	2	0
1	1	1	2	1	-0.0371375	1	1	0	1	1	0	2	0
1	1	0	1	0	-0.005232	0	1	1	1	1	0	2	1
1	1	1	1	0	-0.00445248	1	0	1	1	0	1	2	1
1	2	0	2	0	0.0316994		1	0	0		2	2	0
0	1	0	2	0	0.064264	0	1	1	1	0	0	2	2
1	2	1	1	1	0.137433	0	1	1	1	1	0	2	1
0	2	1	2	1	0.142753	1	1	1	1	0	0	2	2
0	1	1	0	1	0.143932	1	0	0	1	0	2	2	0
1	2	0	2	0	0.151586	0	1	1	1	1	2	2	0
1	1	1	2	0	0.151586	0	0	0	1	1	0	2	0
1	1	1	0	0	0.180786	0	0	1	1	0	0	2	2
1	1	1	2	0	0.213955	0	1	1	1	1	2	2	0
1	2	0	1	0	0.232506	1	1	1	1	1	0	2	1
1	1	1	1	0	0.262809	0	0	1	1	1	0	2	1
1	1	1	1	1	0.270113	0	0	1	1	0	2	2	2
1	1	1	2	1	0.279485	1	1	1	1	1	0	2	0
1	1	1	1	1	0.30074	1	0	0	1	0	2	2	2
1	2	0	1	1	0.335354	1	1	1	0	0	2	2	0
0	2	1	1	1	0.360824	0	1	0	0	0	1	2	1
0	2	0	2	0	0.360824	1	1	1	1	0	2	2	1
1	1	1	1	1	0.360824	1	1	0	1	1	0	2	2
1	2	1	2	1	0.360824	1	1	1	1	0	0	2	2
1	1	1	0	0	0.360824	0	0	1	1	1	0	2	0
1	1	1	2	1	0.360824	0	1	0	1	1	1	2	1
1	1	1	2	0	0.382346	1	1	1	1	1	1	2	0
1	2	1	1	1	0.392397	1	1	0	1	1	0	2	0
1	1	1	2	1	0.432008	0	1	1	1	1	0	2	0
1	1	1	1	1	0.473057	0	0	1	1	1	0	2	0
1	1	1	0	0	0.473057	0	1	1	1	0	0	2	0
1	1	1	2	0	0.473057	1	1	1	1	1	1	2	0
1	1	1	2	1	0.486028	0	1	1	1	1	2	2	0
1	1	0	1	0	0.48997	0	1	1	1	1	0	2	0
1	1	1	1	1	0.496924	0	0	0	1	0	1	2	0
1	1	1	1	0	0.514086	0	1	1	1	1	0	2	0
1	1	0	1	0	0.535555	0	1	1	1	1	0	2	1
1	1	1	2	1	0.612046	0	1	1	1	1	0	2	0
1	2	1	1	0	0.622814	0	1	1	1	1	1	2	0
1	1	1	1	0	0.630896	0	0	1	1	1	0	2	1
0	1	0	2	1	0.63888	1	1	1	1	0	2	2	0
0	2	1	1	1	0.64917	0	0	0	0	0	2	2	1
1	1	1	1	1	0.685648	0	1	1	1	1	0	2	2
1	1	1	1	1	0.726355	0	1	1	1	0	0	2	1
1	1	1	2	1	0.734443	1	1	1	1	1	1	2	1
0	2	1	2	1	0.772977	1	0	0	1	1	0	2	1
1	1	1	2	1	0.810935	1	0	0	1	1		2	1
1	1	1	2	1	0.825241	1	0	0	1	1	2	2	1
1	1		1	0	0.837894	0	1	0	1	0	1	2	0
1	1	0	2	0	0.845549	1	1	1	1	1	1	2	0
1	2	1	2	1	0.845549	1	1	1	1	1	0	2	0
1	1	1	2	0	0.887584	1	0	0	1	1	2	2	0
1	1	1	2	0	0.923167	1	1	1	1	1	2	2	0
1	1	1	2	0	0.923167	0	1	1	1	1	1	2	0
1	1	0	0	0	0.923167	0		1	1	1	0	2	2
0	1	0	1	1	0.933517	0	1	0	1	0	0	2	1
1	1	1	2	0	0.977577	0	1	1	1	0	2	2	0
1	1	1	2	1	1.00703	1	1	1	1	1	0	2	1
0	2	1	1	1	1.03127	1	1	1	1	0	0	2	2
1	1	1	1	1	1.0381	1	0	0	1	0	0	2	0
1	2	0	2	1	1.04575	1	1	1	1	1	2	2	0
1	1	1	2	1	1.05479	1	1	1	1	0	1	2	2
0	1	1	2	0	1.069	1	1	1	1	1	2	2	0
1	1	1	2	0	1.10088	0	1	1	1	1	0	2	2
1	1	1	1	1	1.1021	1	0	1	1	0	2	2	0
1	2	1	2	0	1.12805	1	0	1	1	1	1	2	0
1	1	1	2	1	1.14671	1	1	1	1	1		2	0
1	1	0	2	0	1.15936	1	1	1	1	1	1	2	0
1	1	1	2	1	1.15936	0	1	0	1	1	1	2	1
0	1	1	1	1	1.17095	1	1	1	1	0	1	2	0
0	1	0	2	1	1.17163	1	1	1	1	0	2	2	0
0	2	1	1	1	1.17859	0	1	0	1	0	0	2	1
1	1	1	2	1	1.17859	1	1	0	1	0	2	2	2
1	1	1	2	1	1.20171	0	1	1	1	1	1	2	0
1	1	1	2	0	1.26238	1	1	0	1	1	2	2	1
0	2	1	0	0	1.29083	0	0	1	1	1	0	2	2
1	1	1	2	1	1.39111	1	0	0	1	1	2	2	0
0	1	0	2	1	1.39238	0	1	0	1	0	2	2	1
1	1	1	2	0	1.39778		1		1	0	2	2	1
1	1	1	2	0	1.41824	1	1	0	1	1	2	2	0
1	1	1	2	1	1.48903	1	1	1	1	0	2	2	0
1	1	1	2	1	1.49586	1	1	1	1	0	1	2	0
1	1	1	2	0	1.49586	1	1	1	1	1	1	2	0
1	1	0	2	0	1.5049	1	1	1	1	1	2	2	1
1	1		2	0	1.51428		1				2	2	0
1	1	1	1	1	1.55153	0	0	1	1	1	0	2	0
1	1	1	1	1	1.57972	0	0	1	1	1	0	2	1
0	1	1	2	1	1.58416	1	0	0	1	1	0	2	1
1	1	1	2	1	1.63487	0	1	0	1	1	2	2	0
1	1	0	2	1	1.73014	1	1	1	1	1	0	2	0
0	1	1	1	1	1.73971	1	1	0	1	0	2	2	2
1	1	0	2	0	1.80455	0	1	1	1	1	1	2	0
1	1	0	0	1	1.81733	1	1	1	1	1	1	2	0
1	1	1	2	0	1.81733	0	1	1	1	1	2	2	2
1	1	1	2	1	1.9386	1	0	1	1		2	2	0
1	1	0	2	1	1.9386	1	1	1	1	1	1	2	1
1	1	1	2	1	1.9386	1	1	1	1	0	2	2	0
1	1	1	0	1	1.95221	1	0	1	1	0	1	2	0
1	1	1	2	1	1.97047	1	1	1	1	1		2	0
0	1	1	2	1	1.98411	1	1	1	1	0	2	2	0
1	1	1	2	1	1.98411	1	1	1	1	1	1	2	0
1	1	0	1	1	2.09808	0	1	1	1	0	0	2	1
1	1	1	2	1	2.10522	1	0	1	1	1	0	2	0
1	1	1	2	1	2.18982	1	1	1	1	1	1	2	0
1	1	1	2	0	2.18982	1	1	1	1	0	1	2	0
0	1	0	0	1	2.19403	1	0	0	0		2	2	0
1	1	1	2	1	2.20756	0	1	0	1	1	1	2	0
1	1	1	0	1	2.28134	0	0	1	1	1	1	2	0
1	1	1	2	0	2.30558	0	1	1	1	0	1	2	2
1	1	0	0	0	2.30558	0	1	1	1	0	0	2	0
0	1	1	2	1	2.30626	0	0	1	1	1	1	2	1
1	1	0	2	1	2.35213	1	1	1	1	0	2	2	1
1	1	1	2	0	2.35356	1	1	1	1	1	2	2	0
1	1	0		1	2.35896	1	1	1	1	0	2	2	0
1	1	1	2	1	2.38388	1	1	1	1	1	0	2	2
1	1	1	2	1	2.38388	0	1		1	1	1	2	1
1	1	0	2	1	2.39906	1	1	1	1		2	2	0
1	1	1	2	1	2.42731	1		0	1	0	2	2	0
0	1	0	2	0	2.44525	0	1	0	1	0	2	2	0
1	1	1	2	1	2.51129	1	1	1	1	1	2	2	1
1	1	1	1	1	2.53702	0	1	1	1	0	1	2	0
1	1	1	2	1	2.5628	1	1	1	1	1	2	2	1
1	1	1	2	1	2.56765	1	0	1	1	0	2	2	0
1	1	1	2	1	2.60756	0	1	1	1	0	1	2	2
1	1	0	2	0	2.63598	0	1	1	1	0	1	2	1
0	2	0	1	1	2.72732	0	1	1	1	1	2	2	0
1	1	1	1	1	2.73145	1	0	1	1	0	0	2	2
1	2	1	2	1	2.75224	1		1	1	1	2	2	0
1	1	1	2	1	2.75569	0	1	0	1	1	0	2	2
1	1	1	2	1	2.75649	1		1	1	0	2	2	0
0	1	0	2	0	2.76672	1	1	0	1		2	2	0
1	1	1	2		2.78094	1	1	0	1	1	2	2	0
0	1	1	2	1	2.87895	1	1	1	1	1	2	2	0
1	1	1	2	1	2.93386	1	1	1	1	0	2	2	0
0	1	1	2	1	2.95657	1	1	1	1	1	2	2	1
1	1	1	1	1	2.96641	1	1	1	1	0	0	2	2
1	1	1	2	1	3.05292	0	1	1	1	1	0	2	2
0	1	1	2	1	3.07784	1	1	1	1	0	2	2	0
1	1	1	2	1	3.07784	1	1	1	1	0	2	2	1
1	1	1	2	1	3.07784	1	1	0	1	1	1	2	1
1	1	1	2	1	3.10681	1		0	1	1	2	2	2
0	1	1	2	1	3.10971	1	1	1	1	1	2	2	0
1	1	1	2	1	3.1699	1	1	0	1	1	2	2	1
1	1	1	2	1	3.17184	1	1	0	1	1	2	2	0
1	1	1	2	1	3.20924	0	1	1	1	0	1	2	2
1	1	1	2	1	3.29732	1	1	1	1	1	2	2	0
1	1	1	2	1	3.29732	1	1	1	1	1	2	2	1
1	1	1	2	0	3.31464	1		0	1	1	2	2	0
1	1	0	2	0	3.32906	1	1	0	1	0	2	2	0
1	2	1	2	1	3.43716	1	1	1	1	0	1	2	1
1	1	1	2	0	3.44482	1	1	0	1	1	2	2	0
1	1	0	1	0	3.50655	0	0	1	0	0	1	2	0
1	1	1	2	0	3.5391	0	0	0	1	1	0	2	2
1	1	1	2	0	3.61879	0	0	0	1	1	2	2	2
1	1	1	2	1	3.61879	1	1	1	1	1	2	2	0
0	1	1	2	1	3.64371	1	1	1	1	1	2	2	1
1	1	1	2	1	3.64371	1	1	1	1	1	2	2	0
1	1	0	2	1	3.64451		1	0	1	0	2	2	1
1	1	1	2	1	3.65053	0	1	1	1	0	1	2	0
1	1	1	2	1	3.65053	1	1	1	1	0	2	2	1
1	1	0	2	1	3.65053	0	1	1	1	0	2	2	2
1	1	1	2	1	3.65053	0	1	0	1	1	2	2	1
1	1	1	2	1	3.65053	1	1	1	1	1	1	2	2
1	1	1	2	1	3.66497	0	1	0	1	1	2	2	0
1	1	1	2	1	3.67558	1	1	1	1	0	2	2	0
1	1	1	2	1	3.72983	1	1	1	1	1	2	2	1
1	1	0	2	1	3.97879	1	1	1	1	1	1	2	0
0	1	1	2	1	3.98645	0	1	1	1	1	2	2	0
1	1	1	0	1	3.98645	1	0	0	1		2	2	2
1	1	1	2	1	4.10497	1	1	1	1	1	2	2	0
0	1	1	2	0	4.19216	1	1	1	1	1	2	2	0
1	1	1	2	1	4.19216	1	1	1	1	0	2	2	0
1	1	0	2	1	4.19216	1	1	1	1	1	2	2	2
1	1	1	2	1	4.19216	0	1	1	1	1	1	2	1
1	1	1	2	0	4.19216	0	1	1	1	1	2	2	0
1	1	1	2	0	4.2164	1	1	1	1	1	2	2	2
1	1	1	1	1	4.2164	0		0	1	1	2	2	0
1	1		2	1	4.2164	0	1		1	0	1	2	1
1	1	1	2	1	4.2164	0	1	0	1	1	0	2	2
1	1	1	2	0	4.2164	1	1	0	1	1	2	2	1
1	1	1	2	1	4.2164	0		1	1	1	0	2	2
1	1	1	2	1	4.64579	1	1	1	1	1	1	2	0
0	1	0	2	0	4.75803	0	1	0	1	0	2	2	1
1	1	1	2	1	4.75803	1	1	1	1	1	0	2	2
1	1	0	1	1	4.75803	1	1	1	1	1	0	2	0
1	1	1	2	1	4.75803	0	1	1	1	1	1	2	0
1	1	0	2		4.75803	1	1	0	1	0	2	2	0
1	1	1	2	1	4.75803	1	1	1	1	1	2	2	0
1	1	1	2	1	4.75803	1		1	1	1	0	2	0
0	1	1	2	1	4.96187	1	1	1	1	1	2	2	0
1	1	0	2	1	4.96187	1	1	1	1	0	2	2	0
1	1	0	2	1	4.96187	1	1	1	1	1	1	2	2
1	1	1	2	1	5.0741	0	1	1	1	0	2	2	0
1	1	0	2	1	5.0741	1	1	0	1	0	2	2	0
0	1	1	1	1		1	1	1	1	0	2	1	0
0	1	1	2	0		0	1	1	1	0	1	1	0
0	1	1	2	1		1	1	1	1		2	1	0
0	1	1	2	1		1	1	0	1	0	2	1	1
0	1	0	1	1		1	1	1	1	0	2	1	0
1	1	1	2	1		0	1	1	1	1	0	1	2
1	1	1	2	1		0	1	1	1	1	2	1	0
1	1	1	2	1		1	1	1	1	1	2	1	2
1	1	1	2	1		0	1	0	1	0	2	1	2
1	1	1	2	0		1		0	1		2	1	2
1	1	1	2	1		1	1	1	1	0	2	1	2
1	1	1	2	1		0	1	1	1	1	2	1	2
1	2	1	0	0	-3.88957	0	1	0	1	1	0	1	1
0	2	0	0	1	-3.77734	1	0	1	1	1	0	1	0
0	2	0	1	1	-3.77734	1	1	1	1	0	0	1	0
0	2	0	1	1	-3.77734	0	0	1	1	0	0	1	0
0	2	0	0	0	-3.77734	0	0	0	1	0	0	1	0
0	2	1	1	0	-3.77734	0	1	1	1	1	0	1	1
1	2	1	1	0	-3.77734	1	1	1	1	1	1	1	0
1	2	0	1	1	-3.77734	0	1	0	1	0	1	1	0
1	2	0	0	0	-3.77734	1	1	1	1	0	0	1	0
1	2	0	0	0	-3.77734	1	1	1	1	1	2	1	0
1	2	1	0	0	-3.77734	1	0	1	0	0	1	1	0
0	2	0	0	0	-3.66199	0	0	1	1	0	1	1	0
0	2	1	0	1	-3.62827	1	1	1	1	0	0	1	0
1	2	1	0	0	-3.51603	0	1	0	1	1	0	1	1
1	2	0	1	0	-3.49959	0	0	1	1	1	1	1	0
0	2	1	0	0	-3.45587	1	0	1	1	1	0	1	0
0	2	0	0	0	-3.45587	1	0	1	0	0	1	1	0
1	2	0	0	0	-3.42734	1	0	0	1	1	0	1	0
0	2	1	0	1	-3.37938	1	0	1	1	1	1	1	0
0	2	1	2	0	-3.26715	1	1	1	1	0	2	1	1
0	2	0	1	0	-3.26715	1	1	0	1	1	0	1	0
0	2	0	0	0	-3.26715	0	1	1	1	1	0	1	0
1	2	0	2	1	-3.26715	0	1	0	1	1	2	1	0
1	2	0	1	0	-3.26715	0	1	0	1	1	0	1	0
1	2	1	0	0	-3.26715	0	0	1	1	0	1	1	0
1	2	1	0	1	-3.26715	0	1	1	1	1	1	1	0
0	2	1	1	0	-3.22376	0	1	1	1	1	1	1	0
0	1	0	0	1	-3.02688	1	0	0	1	0	0	1	1
1	2	1	2	0	-3.01998	1	1	1	1	1	1	1	1
0	2	1	0	1	-3.00272	1	1	1	1	0	0	1	2
0	1	1	0	1	-2.96926	1	0	1	1	0	1	1	2
1	2	0	1	1	-2.94568		1	1	1		2	1	1
1	2	1	0	0	-2.94334	1	1	0	1	1	0	1	0
0	2	1	1	1	-2.91714	0	1	1	1	0	0	1	1
0	2	1	1	0	-2.91714	1	0	1	1	0	0	1	1
1	2	0	1	0	-2.8258	0	1	1	1	1	0	1	0
0	1	1	1	1	-2.73085	1	1	0	1	0	1	1	1
1	2	0	1	1	-2.71357	1	1	1	1	1	0	1	0
1	2	0	1	0	-2.71357	1	0	1	1	1	0	1	0
0	1	1	0	0	-2.61926	0	1	0	1	0	1	1	1
0	2	0	0	1	-2.57849	0	1	0	1	1	1	1	0
1	2	0	0	0	-2.5651	1	0	0	1	0	2	1	0
1	2	1	1	0	-2.5651	0	1	1	1	1	0	1	0
0	2	0	0	1	-2.54056	0	0	0	1	1	0	1	0
0	1	0	0	1	-2.53536	0	0	1	1	0	0	1	0
0	2	0	0	0	-2.35874	1	1	1	1		0	1	0
0	2	1	0	0	-2.17002	0	0	1	1	1	1	1	1
1	2	1	1	1	-2.16544	1	1	1	1	1	1	1	2
1	1	0	0	1	-2.13418	0	0	1	0	0	0	1	2
1	1	0	0	0	-2.1034	0	0	1	1	1	1	1	2
0	2	0	0	1	-2.09743	1	1	1	1		2	1	0
0	2	1	0	0	-2.0549	1	0	1	1	0	0	1	0
0	2	0	1	0	-2.01697	0	0	1	1	1	1	1	1
1	1	0	0	1	-1.986	0	0	1	1	1	1	1	2
1	1	0	0	0	-1.97399	0	0	1	1	0	1	1	1
1	1	0	2	0	-1.89918	0	1	0	1	0	0	1	0
0	1	0	1	0	-1.84002	0	0	1	1	1	0	1	0
1	1	1	1	0	-1.78759	1	0	0	1	0	1	1	0
1	2	1	1	0	-1.78208	0	1	1	1	0	0	1	0
0	1	1	0	0	-1.7731	0	0	1	1	1	0	1	1
0	1	0	0	1	-1.73934	0	0	1	1	1	0	1	2
1	1	1	0	0	-1.73934	0	1	0	1	0	1	1	0
1	2	0	1	0	-1.73412	0	1	1	1	1	2	1	2
1	1	1	2	1	-1.63748	0	1	1	1	1	1	1	0
1	2	0	0	0	-1.61901	1	0	0	1	1	0	1	0
1	1	0	0	1	-1.59478	1	1	1	1	0	0	1	1
1	2	0	1	0	-1.46797	1	1	0	1	1	0	1	0
0	2	0	2	1	-1.41265	0	1	0	1	1	2	1	0
1	1	0	1	1	-1.41108	0	1	1	1	1	0	1	1
0	1	1	2	0	-1.32983	1	1	0	1	0	1	1	0
0	1	1	0	1	-1.32983	1	0	0	1	0	0	1	1
1	1	1	2	0	-1.32252	0	1	0	1	1	2	1	1
0	1	1	1	1	-1.30251	1	1	1	1	1	0	1	0
1	1	1	1	0	-1.25704	1	1	0	1	1	2	1	1
1	1	0	0	0	-1.23952	0	1	1	1	1	1	1	0
1	1	1	0	0	-1.20666	0	1	1	1	1	0	1	1
1	1	1	0	0	-1.1524	0	0	1	1	0	1	1	0
0	1	0	2	0	-1.14755	1	1	1	1	1	2	1	0
0	1	1	0	0	-1.14755	0	0	1	1	0	0	1	2
0	1	0	0	0	-1.11963	0	0	0	1	0	2	1	2
0	2	0	0	1	-1.11908	1	1	1	1		2	1	0
0	1	0	0	1	-1.09809	1	1	0	1	0	1	1	0
1	1	1	0	0	-1.09363	0	1	1	1	0	0	1	0
1	1	0	1	1	-1.0645	1	1	1	0	0	2	1	2
1	1	1	0	0	-0.968245	1	0	1	1	1	0	1	1
1	1	1	1	1	-0.900887	0	1	1	1	1	1	1	1
1	1	1	2	0	-0.900887	1	1	0	1	1	2	1	0
0	1	1	1	1	-0.866617	1	0	0	1	0	1	1	2
0	1	0	0	0	-0.803534	0	1	1	1	0	0	1	0
1	1	0	1	1	-0.798162	0	1	1	1	1	0	1	1
0	1	1	1	1	-0.746843	1	1	1	1	1	2	1	0
0	1	1	2	1	-0.746843	1	1	0	1	1	1	1	1
1	1	0	1	1	-0.642206	1	1	1	1	1	1	1	2
0	1	0	1	1	-0.613092	1	1	1	1	0	1	1	0
0	1	0	2	1	-0.583233	0	0	1	1	1	0	1	2
1	1	1	2	1	-0.579161	0	1	1	1	1	2	1	0
1	1	1	1	1	-0.579161	0	1	1	1	1	2	1	0
1	1	1	1	1	-0.579161	0	1	0	1	1	0	1	0
1	2	0	0	1	-0.578653	1	0	0	1	0	1	1	0
1	2	0	1	0	-0.578653	1	1	1	1	0	2	1	0
0	1	1	0	0	-0.56512	1	1	0	1	1	2	1	1
0	1	0	1	0	-0.536775	0	1	0	1	0	0	1	1
0	1	1	0	1	-0.529471	0	0	0	1	1	0	1	1
1	1	1	1	1	-0.529471	1	1	0	1	0	0	1	2
0	1	1	2	1	-0.516426	1	1	1	1	0	1	1	0
0	1	1	0	0	-0.444086	0	0	1	1	0	0	1	2
0	1	0	0	1	-0.429307	1	0	1	0	0	1	1	1
1	1	1	1	1	-0.429307	0	1	0	1	0	2	1	0
	1		0	1	-0.429307		0				2	1	0
0	1	1	0	0	-0.427424	0	0	1	1	0	1	1	0
0	1	0	0	0	-0.404193	0	1	0	1	1	0	1	0
0	1	0	2	1	-0.396539	1	1	0	1	0	1	1	1
1	1	1	1	1	-0.374994	1	1	1	1	1	0	1	2
0	1	0	1	1	-0.358608	0	0	0	1	0	0	1	1
0	1	0	0	1	-0.340747	0	1	0	1	1	1	1	1
0	1	0	0	0	-0.340747	1	0	1	1	1	1	1	0
1	1	1	0	0	-0.318852	1	0	1	1		2	1	1
1	1	1	0	1	-0.267352	0	1	1	1	1	0	1	0
1	1	1	1	0	-0.257691	1	0	0	1	0	2	1	1
1	1	1	0	0	-0.257691	0	0	1	1	0	0	1	2
0	1	1	0	1	-0.206314	0	0	1	1	1	0	1	0
	1		2	1	-0.168683		1				2	1	1
0	1	1	2	1	-0.16578	1	1	0	1	0	2	1	0
0	1	0	1	0	-0.16578	1	0	0	1	0	1	1	1
0	1	1	1	1	-0.16578	1	0	0	1	1	1	1	0
1	1	0	2	0	-0.16578	1	1	1	1	0	2	1	0
0	1	0	1	1	-0.135152	0	1	0	1	0	2	1	1
1	1	1	1	0	-0.127849	0	1	1	1	1	0	1	2
1	1	1	0	0	-0.094081	0	0	1	1	0	0	1	0
1	1	0	2	1	-0.0876443	1	0	1	1	0	1	1	1
1	1	1	1	1	-0.0750685	0	1	0	1	1	1	1	1
1	1	1	1	1	-0.0750685	0	1	1	1	1	1	1	1
1	1	0	1	0	-0.0586071	0	1	1	1	1	1	1	2
0	1	0	1	0	-0.0528803	1	1	1	1		2	1	0
1	1	1	0	0	-0.0257757	0	0	1	1	1	0	1	1
1	1	0	1	1	0.0113501	0	1	0	1	1	0	1	1
0	1	1	1	1	0.080887		1	1	1		2	1	0
1	1	0	0	0	0.080887	1	1	1	1	1	2	1	1
1	1	1	2	1	0.0852869	0	1	1	1	0	1	1	2
0	1	0	1	1	0.118818	1	1	0	1	1	0	1	1
0	1	0	2	0	0.143932	0	1	0	1	0	2	1	1
0	1	1	1	0	0.143932	0	1	1	1	1	1	1	2
1	1	1	2	1	0.143932	1	1	1	1	0	1	1	2
1	1	1	1	0	0.143932	0	1	1	1	0	2	1	1
1	1	1	1	0	0.143932	0	1	0	1	0	2	1	0
0	1	0	1	0	0.151586	1	0	0	1	0	2	1	1
0	1	0	2	1	0.151586	1	1	0	1	0	2	1	0
1	1	1	1	1	0.151586	1	1	1	1	1	0	1	1
1	1	1	1	0	0.151586	0	1	1	1	1	2	1	1
1	1	1	1	0	0.155691	0	1	0	1	1	2	1	0
1	1	1	0	0	0.186318	0	0	1	1	1	0	1	2
1	1	1	2	1	0.200074	1	1	0	1	1	1	1	1
1	1	1	2	1	0.226944		1	0	1	0	2	1	1
1	1	0	1	0	0.22739	1	0	1	1	1	1	1	1
1	1	1	2	1	0.262863	1	1	0	1	1	0	1	2
0	1	0	1	0	0.289769	0	1	1	1	1	1	1	1
1	1	1	1	0	0.289769	1	1	1	1	1	0	1	1
0	1	0	1	1	0.335554	1	1	1	1	0	2	1	0
0	1	1	1	0	0.35317	1	1	0	1	1	1	1	2
1	1	1	2	1	0.35317	0	1	0	1	1	1	1	1
1	1	1	2	1	0.375042	0	1	0	1	1	0	1	2
1	1	1	1	1	0.375042	0	1	1	1	1	1	1	0
0	1	0	1	0	0.382346	0	0	0	1	1	1	1	1
1	1	0	2	0	0.382346	0	1	1	1	0	2	1	0
1	1	1	2	1	0.382346	1	1	1	1	1	2	1	1
1	1	1	0	1	0.382346	1	1	1	1	1	1	1	1
1	1	1	1	0	0.382346	0	1	1	1	1	2	1	1
1	1	1	2	1	0.402357	1	1	0	1	1	2	1	0
1	1	1	2	1	0.402357	1	1	0	1	1	2	1	1
0	1	1	1	0	0.440288	1	0	1	1	0	2	1	1
1	1	1	0	0	0.453507	0	0	1	1	0	1	1	0
0	1	0	2	1	0.455741	0	0	0	1	1	2	1	0
1	1	1	2	1	0.455741	1	1	1	1	1	1	1	2
1	1	0	0	0	0.465403	0	1	1	1	1	0	1	1
1	1	1	0	0	0.465403	0	1	1	1	1	2	1	1
1	1	1	1	1	0.465403	0	1	0	1	1	2	1	0
1	1	1	1	1	0.465403	1	1	1	1	0	2	1	0
1	1	1	1	0	0.465403	0	1	0	1	1	0	1	1
1	1	1	0	0	0.473057	1	0	1	1	0	1	1	0
1	1	1	2	1	0.521544	0	1	1	1	1	1	1	0
0	1	1	1	0	0.629012	1	1		1		2	1	0
0	1	1	1	0	0.629012	0	0	1	1	1	0	1	1
0	1	1	1	0	0.629012	0	0	1	1	1	2	1	0
0	1	1	1	1	0.629012	1	1	1	1	1	2	1	0
1	1	1	2	0	0.629012	0	1	0	1	1	2	1	1
1	1	0	2	1	0.629012	0	1	1	1	1	0	1	1
1	1	1	1	1	0.629012	0	1	1	1	0	0	1	1
1	1	0	1	0	0.629012	0	1	0	1		0	1	1
1	1	1	2	0	0.629012	1	1	1	1	1	2	1	1
1	1	1	1	0	0.629012	0	1	1	1	1	2	1	2
1	1	0	2	0	0.629012	0	1	0	1	0	2	1	0
1	1	1	1	0	0.629012	0	0	1	1	1	0	1	0
1	1	1	2	1	0.629012	1	1	1	1	0	1	1	1
1	1	0	1	1	0.629012	1	1	0	1	0	2	1	0
1	1	1	2	0	0.646755	0	1	1	1	1	1	1	1
0	1	0	1	1	0.658212	1	1	1	1	1	1	1	1
1	1	1	2	1	0.662617	0	1	1	1	1	0	1	2
0	1	0	1	1	0.664979	0	1	0	1	0	2	1	0
0	1	1	1	1	0.696512	0	1	1	1	1	2	1	1
1	1	1	1	1	0.696512	0	1	0	1	0	1	1	2
1	1	1	2	1	0.700912	1	1	1	1	1	2	1	0
0	1	1	2	1	0.703816	0	1	0	1	0	2	1	0
0	1	1	1	0	0.703816	1	1	0	1	0	0	1	2
1	1	1	1	0	0.703816	1	1	1	1	0	2	1	2
1	1	1	2	0	0.703816		1	1	1		2	1	2
1	1	1	1	1	0.703816	1	0	0	1	1	2	1	1
0	1	0	2	0	0.7098	1	0	1	1	0	1	1	0
0	1	1	0	0	0.716625	1	0	1	1	0	0	1	0
0	1	1	1	1	0.716625	0	1	1	1	1	1	1	0
1	1	1	2	1	0.716625	1	1	0	1	0	1	1	0
0	1	0	1	0	0.724279	0	1	0	1	0	2	1	1
1	1	1	1	0	0.734443	1	1	1	1	0	1	1	1
1	1	1	1	0	0.734443	1	0	1	1	1	1	1	2
0	1	0	0	0	0.735046	1		0	1	0	0	1	0
1	1	1	2	0	0.774849	0	1	0	1	0	1	1	1
1	1	1	1	1	0.777212	1	1	1	1	1	1	1	0
1	1	1	2	0	0.789131	1	1	0	1	0	2	1	0
0	1	0	1	1	0.804199	1	1	1	1	0	1	1	0
0	1	1	1	0	0.837894	1	1	1	1		2	1	0
0	1	1	1	1	0.837894	1	1	0	1	1	0	1	0
1	1	0	0	0	0.837894	0	1	0	1	1	0	1	1
1	1	1	1	1	0.837894	1	0	0	1		2	1	0
1	1	1	0	0	0.894036	1	0	0	1	1	0	1	0
1	2	0	2	1	0.907085	0	1	0	1	1	0	1	0
0	1	0	2	0	0.923167	1	1	1	1	0	1	1	1
0	1	1	1	1	0.923167	1	1	1	1	1	2	1	2
0	1	0	1	1	0.923167	1	1	1	1	1	2	1	0
0	1	0	1	1	0.923167	0	1	1	1	1	2	1	0
1	1	0	2	1	0.923167	1	1	0	1	0	2	1	1
1	1	1	2	0	0.923167	0	1	0	1	1	1	1	0
1	1	1	2	1	0.923167	1	1	1	1	1	2	1	0
1	1	1	2	0	0.923167	1	1	1	1	1	2	1	0
1	1	0	0	1	0.923167	1	0	1	1	1	1	1	2
1	1	0	1	1	0.923167	1	1	0	1	1	1	1	2
1	1	1	2	0	0.923167	0	1	1	1	1	1	1	0
1	1	1	2	1	0.923167	1	1	1	1	1	2	1	1
1	1	0	0	1	0.923167	0	0	1	1	1	1	1	0
1	1	1	1	1	0.923167	0	1	1	1		1	1	0
1	1	1	1	1	0.923167	0	1	0	1	1	1	1	1
1	1	1	1	0	0.923972	0	0	1	1	1	0	1	0
1	1	1	2	1	0.945086	1	1	0	1	0	1	1	1
1	1	1	1	1	0.947775	0	0	1	1	1	0	1	1
0	1	1	2	0	0.950483	1	1	0	0		2	1	1
0	1	1	2	1	0.950483	1	1	1	1	1	1	1	0
0	1	0	1	0	0.950483	1	0	1	1	0	1	1	1
0	1	0	2	0	0.950483	1	1	1	1	0	2	1	0
0	1	0	1	1	0.950483	1	1	0	1		2	1	1
0	1	0	1	1	0.950483	1	1	0	1	0	2	1	1
1	1	1	2	1	0.950483	1	1	1	1	1	0	1	2
1	1	1	2	1	0.950483	1	1	0	1	0	2	1	0
1	1	1	2	0	0.950483	1	1	1	1	1	1	1	2
1	1	1	2	0	0.950483	1	1	1	1	0	2	1	2
1	1	0	1	1	0.950483	1	1	0	1	1	2	1	1
1	1	1	1	1	0.950483	1	1	1	1	1	1	1	1
1	1	1	1	1	0.950483	0	1	1	1	1	1	1	1
1	1	0	1	1	0.950483	1	1	0	1	0	2	1	1
1	1	1	2	0	0.950483	1	1	1	1	1	2	1	0
1	1	0	1	1	0.950483	1	1	0	1	0	2	1	2
1	1	0	2	1	0.950483	1	1	1	1	0	0	1	2
1	1	1	0	1	0.950483	0	0	1	1	1	1	1	0
1	1	0	2	0	0.950483	1	1	0	1	1	1	1	1
1	1	1	2	0	0.950483	0	0	0	1	1	1	1	1
1	1	1	0	1	0.950483	1	0	0	1	1	1	1	0
0	1	0	1	0	0.955039	0	1	1	1	0	2	1	2
1	1	1	2	1	0.955039	0	1	1	1	1	1	1	1
1	1	0	1	1	0.955039	1	0	1	1	1	0	1	1
1	1	1	1	1	0.955039	1	0	1	1	1	0	1	0
1	1	1	2	1	0.955039	0	1	1	1	1	1	1	2
1	1	0	2	1	0.955039	0	1	1	1	1	1	1	2
1	1	1	2	1	1.00056	0	1	1	1	1	2	1	1
0	1	1	2	1	1.02843	1	0	0	1	1	1	1	1
0	1	1	1	0	1.03127	1	1	1	1		2	1	0
1	1	1	1	1	1.03127	1	1	1	1	1	2	1	1
1	1	0	2	1	1.03127	1	1	1	1	1	2	1	1
0	1	1	1	1	1.0381	0	1	1	1	1	0	1	2
0	1	1	2	1	1.0381	1	1	0	1	0	2	1	0
1	1	1	1	1	1.0381	0	1	1	1	0	2	1	1
1	1	1	2	1	1.04713	1	1	1	1	1	1	1	1
1	1	1	2	0	1.05652	1	1	1	1	1	0	1	2
1	1	0	1	0	1.06317	1	1	0	1	1	2	1	0
1	1	1	2	0	1.06317	1	1	1	1	1	0	1	1
1	1	0	2	1	1.06317	0	1	1	1	0	1	1	0
1	1	1	2	0	1.06981	1	1	0	1	0	2	1	1
0	1	1	2	0	1.07631	1	1	0	1	1	1	1	0
1	1	1	2	0	1.08947	0	1	1	1	1	0	1	2
1	1	1	2	1	1.09405	1	0	1	1	1	0	1	2
1	1	1	1	0	1.11111	0	1	1	1	0	1	1	1
0	1	0	1	1	1.13241	0	1	0	1	0	0	1	0
0	1	0	1	1	1.13241	1	1	1	0	0	0	1	0
0	1	0	2	1	1.13241	0	1	1	1	1	1	1	1
1	1	1	2	1	1.13241	0	1	0	1	1	1	1	0
1	1	1	1	0	1.13241	1	0	0	1	0	1	1	1
0	1	1	1	1	1.1497	0	1	0	1	1	1	1	0
1	1	1	2		1.1497	1	1	1	1	1	1	1	1
1	1	1	1	1	1.15936	1	1	0	1	1	0	1	0
1	1	1	2	0	1.15936	1	1	1	1	1	2	1	0
0	1	0	0	1	1.17064	1	0	1			2	1	0
0	1	1	1	1	1.17064	1		1	1	0	0	1	2
1	1	1	0	1	1.17064	0	0	1	0	0	1	1	2
1	1	0	2	0	1.17064	1	1	0	1	1	1	1	1
0	1	1	2	1	1.19488	1	1	1	1	1	1	1	2
0	1	1	2	0	1.19488	0	1	0	1	1	1	1	2
0	1	0	1	0	1.19488	0	1	1	1	1		1	0
0	1	1	2	1	1.20171	1	1	0	1	1	0	1	0
1	1	1	2	1	1.20171	1	1	0	1	0	2	1	1
1	1	0	2	1	1.22013	0	1	1	1	1	1	1	1
0	1	1	1	1	1.23924	0	1	0	1	1	2	1	1
0	1	1	1	0	1.24464	0	1	1	1	1	0	1	0
0	1	1	1	0	1.24464	1	0	0	1	0	2	1	1
0	1	0	2	0	1.24464	0	1	0	1	0	2	1	0
0	1	1	2	1	1.24464	0	1	1	1	1	2	1	1
0	1	1	2	0	1.24464	1	1	1	1	0	2	1	1
0	1	1	1	0	1.24464	1	1	0	1	0	0	1	2
1	1	1	1	1	1.24464	1	0	1	0	0	0	1	2
1	1	1	1	0	1.24464	0	0	1	1	1	0	1	0
1	1	1	2	1	1.24464	1	1	1	1	1	0	1	1
1	1	0	1	1	1.24464	1	1	1	1	1	1	1	0
1	1	0	2	1	1.24464	0	1	1	1	1	0	1	1
1	1	1	2	1	1.24464		1	1	1		2	1	0
1	1	1	0	1	1.24464	0	0	1	1	0	1	1	0
0	1	0	1	1	1.26656	1	0	1	1		2	1	1
1	1	1	2	1	1.26678	0	1	1	1	1	2	1	0
0	1	1	0	0	1.26968	0	0	0	1	0	0	1	0
1	1	0	1	1	1.27607	1	1	1	1	1	2	1	0
1	1	1	0	1	1.27651	0	1	0	1	0	1	1	0
1	1	1	2	1	1.27651	1	1	1	1	1	1	1	2
1	1	1	2	1	1.28249	1	1	0	1	0	2	1	2
0	1	1	1	0	1.32297	0	1	1	1	1	1	1	1
1	1	1	1	0	1.32297	1	1	1	1	0	0	1	1
1	1	1	1	1	1.3768	1	1	1	1	0	1	1	1
1	1	1	2	0	1.3768	1	1	1	1	1	1	1	0
0	1	1	2	0	1.39778	1	1	0	1	0	2	1	0
1	1	1	2	1	1.39778		1	0	1		2	1	0
1	1	1	1	0	1.39778	0	1	1	1	0	1	1	2
0	1	1	0	1	1.40703	0	1	1	1	1	0	1	1
1	1	1	1	0	1.40703	0	1	0	1	1	1	1	1
0	1	0	1	1	1.41094	0	0	0	1	0	2	1	0
0	1	1	2	0	1.42841	1	1	1	1	0	1	1	2
1	1	0	2	1	1.46479		1	1	1	0	2	1	0
1	1	0	2	1	1.46479		1	1	1	0	2	1	0
1	1	1	2	1	1.46749	1	1	0	1	1	1	1	1
0	1	0	0	0	1.46832	0	0	1	1	0	2	1	0
0	1	1	2	1	1.48903	0	1	0	1	1	2	1	2
1	1	0	2	1	1.49211	1	1	0	1	0	2	1	1
0	1	1	1	1	1.49586	1	1	1	1	1	1	1	0
0	1	0	2	0	1.49586	0	1	1	1	1	2	1	2
0	1	1	1	0	1.49586	0	1	1	1	1	0	1	2
1	1	1	1	1	1.49586	1	1	1	1	1	2	1	0
1	1	1	1	1	1.49586	0	1	0	1	0	2	1	0
0	1	1	2	1	1.51635	1	1	1	1	1	2	1	1
1	1	1	2	1	1.51635	1	1	0	1		2	1	1
1	1	1	2	1	1.51635	1	1	1	1	1	1	1	2
1	1	1	1	1	1.51635	1	1	0	1	1	1	1	2
0	1	0	1	1	1.52159	0	1	1	1	0	2	1	0
0	1	1	2	1	1.52318	1	1	1	1	1	2	1	0
0	1	1	2	1	1.52318	1	1	0	1	1	0	1	2
0	1	1	2	0	1.52318	0	1	1	1	1	1	1	1
0	1	0	1	1	1.52318	1	1	1	1	0	2	1	0
0	1	1	1	0	1.52318	1	0	0	1	1	1	1	1
1	1	0	2	1	1.52318	0	1	1	1	1	1	1	1
1	1	1	1	1	1.52318	0	1	1	1	0	0	1	1
1	1	1	1	0	1.52318	1	1	1	1	0	2	1	0
1	1	0	2	1	1.52318	1	1	1	1	0	2	1	0
1	1	1	2	1	1.52318	1	1	1	1		2	1	0
1	1	1	2	0	1.52318	0	1	1	1	1	2	1	0
1	1	1	2	0	1.52318	0	1	1	1	1	2	1	0
1	1	1	2	1	1.53221	0	0	0	1	1	2	1	1
1	1	0	2	0	1.55221	0	1	1	1	0	2	1	1
0	1	0	1	1	1.56071	1	1	0	1	0	2	1	0
0	1	1	2	1	1.57972	1	1	0	1	1	2	1	2
1	1	1	2	0	1.57972	1	1	1	1	1	1	1	2
0	1	0	2	1	1.60464	1	1	1	1		2	1	2
0	1	1	2	1	1.60464	1	1	1	1	1	0	1	1
1	1	1	2	0	1.6123	0	1	1	1	1	2	1	2
0	1	0	1	0	1.61713	1	1	1	1	0	2	1	0
0	1	1	2	0	1.61713	0	1	1	1	1	2	1	1
1	1	0	1	1	1.61713	0	1	1	1	1	2	1	1
1	1	1	2	0	1.61713	0	1	0	1	1	1	1	1
1	1	0	1	0	1.61713	1	1	1	1	0	2	1	0
1	1	1	2	1	1.61713	0	1	1	1	1	1	1	0
1	1	1	2	1	1.61982	1	1	1	1		2	1	1
1	1	1	1	0	1.64218	0	1	1	1	1	2	1	0
1	1	0	2	1	1.64445	1	1	1	1	1	2	1	1
1	1	0	2	0	1.64445	1	1	1	1	1	2	1	0
0	1	0	2	1	1.67874	0	1	0	1	1	2	1	1
1	1	1	1	1	1.69827	1	1	1	1	1	2	1	0
0	1	1	0	1	1.71189	1	0	0	1	1	0	1	1
1	1	1	2	0	1.73651	1	1	1	1	0	0	1	0
1	1	0	2	0	1.74333	0	1	0	1	0	2	1	0
1	1	1	2	1	1.74333	1	1	1	1	1	2	1	0
1	1	0	2	0	1.76107	0	0	0	1	1	0	1	1
1	1	1	2	1	1.76757	1	1	0	1	0	2	1	1
0	1	0	1	1	1.76825	1	1	0	1	0	1	1	2
1	1	0	0	1	1.76825	1	1	1	1	1	0	1	1
1	1	0	2	1	1.76825	1	1	0	1	1	2	1	0
0	1	0	2	0	1.78626	1	1	0	1	0	2	1
0	1	1	2	0	1.78626	1	1	1	1	0	2	1	0
1	1	1	2	0	1.78626	1	1	1	1	0	2	1	2
1	1	1	1	1	1.78626	1	0	1	1	1	0	1	1
1	1	1	1	0	1.78626	0	1	0	1	1	0	1	1
1	1	1	2	1	1.78626	1	1	1	1	1	0	1	1
1	1	0	2	1	1.78626	1	1	1	1	0	2	1	2
0	1	1	2	1	1.81051	1	1	0	1	1	2	1	0
1	1	1	2	1	1.81051	1	1	1	1	0	2	1	0
1	1	0	2	1	1.81051	1	1	1	1	1	1	1	2
1	1	1	1	1	1.81051	0	1	1	1	1	2	1	0
1	1		2	1	1.81051		1				2	1	0
0	1	1	2	0	1.81733	0	1	0	1	1	2	1	0
0	1	1	1	0	1.81733	0	0	1	1	1	2	1	0
0	1	1	2	1	1.81733	1	1	1	1	0	2	1	0
1	1	1	2	1	1.81733	0	1	1	1	0	2	1	0
1	1	1	1	1	1.84306	0	1	1	1	1	0	1	0
1	1	0	0	1	1.84306	1	0	0	1	1	2	1	2
1	1	1	2	1	1.8646	0	1	1	1	1	2	1	0
0	1	1	2	1	1.9386	1	1	1	1	1	2	1	1
0	1	0	2	1	1.9386	0	1	0	1	1	2	1	1
1	1	0	2	1	1.9386	1	1	0	1	0	2	1	0
1	1	1	2	1	1.9386	0	1	0	1	1	2	1	0
1	1	0	2	1	1.9386	1	1	1	1	0	2	1	1
0	1	1	2	1	1.95634	1	1	1	1	1	1	1	1
0	1	1	2	0	1.95634	0	1	1	1	1	1	1	1
1	1	1	2	0	1.97047	1	1	0	1		2	1	1
0	1	0	2	1	1.98205	1	1	1	1	1	2	1	2
1	1	0	2	1	2.01435	1	1	0	1	1	2	1	2
1	1	1	2	1	2.02117	0	1	1	1	1	2	1	0
0	1	0	1	1	2.03066	1	1	0	1		2	1	0
0	1	1	2	1	2.03749	1	1	1	1	0	1	1	0
1	1	1	0	1	2.03749		0	1	1		2	1	0
1	1	1	2	1	2.03749	1	0	1	1	1	1	1	1
0	1	1	2	0	2.05481	0	1	0	1	1	2	1	0
	1		1	1	2.05798		1				2	1	0
0	1	0	2	1	2.06173	1	1	1	0		2	1	0
0	1	0	2	0	2.06241	1	1	1	1		2	1	2
1	1	1	2	1	2.06241	1	1	0	1		2	1	1
1	1	1	2	1	2.06241	1	1	0	1		2	1	0
1	1	0	1	1	2.06241	1	1	0	1	0	2	1	0
1	1	0	1	1	2.06844	0	1	1	1	0	2	1	1
1	1	1	1	1	2.07076	1	0	0	1	1	2	1	0
0	1	1	1	1	2.07157	1	0	0	1	1	2	1	0
1	1	0	1	1	2.08365	0	1	1	1	1	0	1	1
0	1	0	2	1	2.08745	1	1	0	1	1	2	1	2
1	1	0	2	1	2.09428	1	1	1	1	1	2	1	2
0	1	0	2	1	2.09808	1	0	1	1		2	1	1
1	1	1	2	1	2.10491	1	1	1	1	1	2	1	2
0	1	0	1	1	2.15876	1	1	1	1	0	2	1	0
1	1	1	2	1	2.15876	1	1	1	1	0	2	1	0
1	1	1	2	1	2.17733	0	1	0	1	1	1	1	0
1	1	1	2	1	2.183	0	1	1	1	1	1	1	0
0	1	0	1	1	2.18607	0	1	1	1	0		1	0
0	1	0	0	1	2.18982	1	0	1	1	0	2	1	1
0	1	1	2	1	2.18982	0	1	0	1	1	1	1	1
0	1	0	0	1	2.18982	1	1	0	1	1	1	1	0
1	1	1	2	1	2.18982	1	1	1	1	0	2	1	1
1	1	1	2	0	2.18982	0	1	1	1	1	2	1	0
1	1	1	2	1	2.19495	1	1	0	1	1	1	1	1
1	1	1	2	1	2.19765	0	1	1	1	1	2	1	1
1	1	0	2	0	2.20756	1	1	1	1	1	2	1	1
1	1	0	1	1	2.21555	1	1	0	1	1	0	1	1
0	1	0	2	0	2.21714	0	0	0	1	1	2	1	0
0	1	0	1	1	2.21714	1	1	0	1	0	0	1	0
1	1	1	2	1	2.21714	1	1	1	1	1	2	1	2
1	1	1	2	1	2.21714	1	1	0	1	1	2	1	0
0	1	0	1	1	2.22365	0	1	0	1	1	1	1	1
1	1	1	2	1	2.23039	0	1	1	1	1	1	1	0
1	1	1	2	1	2.24012	0	1	0	1	1	1	1	2
0	1	1	2	0	2.26182	0	1	1	1	1	1	1	0
1	1	1	2	0	2.26829	0	1	0	1	1	0	1	1
1	1	1	2	1	2.27164	0	1	1	1	1	1	1	1
1	1	1	1	1	2.27164	1	1	1	1	1	1	1	0
1	1	1	2	1	2.29793	1	1	0	1	0	2	1	1
1	1	1	2	1	2.29793	1	1	0	1	0	2	1	0
1	1	1	2	1	2.30558	1	1	0	1	0	2	1	0
1	1	1	1	0	2.32506	1	0	1	1	0	0	1	1
1	1	1	2	1	2.35213	1	1	0	1	1	1	1	1
1	1	0	0	0	2.35606	1	0	0	0	0	2	1	2
0	1	1	1	1	2.35896	1	1	0	1	0	2	1	1
0	1	1	1	1	2.35896	1	1	1	1	1	2	1	1
0	1	0	2	1	2.35896	1	1	0	1	1	0	1	2
0	1	1	2	1	2.35896	0	1	1	1	1	2	1	0
1	1	1	2	1	2.35896	1	1	0	1	0	2	1	0
1	1	1	2	1	2.35896	1	1	0	1	1	2	1	0
1	1	1	2	1	2.35896	0	1	0	1	1	0	1	0
1	1	0	2	1	2.3778	1	1	1	1	1	2	1	0
0	1	0	2	1	2.3832	1	1	0	1	0	2	1	0
1	1	1	2	0	2.3832	1	1	0	1	0	2	1	0
1	1	1	1	0	2.3832	0	1	1	1	1	0	1	1
1	1	1	2	1	2.3832	0	1	0	1	1	0	1	1
1	1	1	1	1	2.3832		1	1	1	0	2	1	0
1	1	1	2	1	2.38388	0	1	1	1	1	1	1	0
1	1	1	2	1	2.38388	1	1	0	1	1	2	1	1
1	1	1	2	1	2.38388	1	1	0	1	1	2	1	0
1	1	1	2	1	2.384	0	1	0	1	1	0	1	0
1	1	1	1	1	2.384	1	1	1	1		2	1	0
0	1	1	2	0	2.39304	1	1		1		2	1	0
0	1	0	1	1	2.39906	1	1	0	1		2	1	0
1	1	0	2	1	2.40654	0	1	0	1	1	2	1	0
1	1	1	2	1	2.41575	0	1	1	1		0	1	0
1	1		2	1	2.41575		1				2	1	2
1	1	1	2	0	2.41575	0	1	0	1	1	1	1	2
0	1	1	1	1	2.42026	1	1	0	1	0	0	1	1
1	1	1	1	1	2.42731	1	0	1	1	1	2	1	0
1	1	1	2	1	2.43729	0	1	1	1	1	2	1	0
0	1	0	2	0	2.46221	0	1	1	1	1	0	1	1
1	1	1	1	1	2.46221	0	1	1	1	1	0	1	0
1	1	0	2	0	2.46221	0	1	1	1	1	2	1	2
1	1	1	1	0	2.47996	0	1	1	1	1	1	1	1
0	1	1	2	0	2.48023	0	0	1	1	1	1	1	1
1	1	0	2	1	2.48023	0	1	0	1	0	2	1	2
1	1	1	2	1	2.50447	1	1	1	1	1	2	1	0
1	1	1	2	1	2.50447	1	1	1	1	1	2	1	0
1	1	1	2	1	2.5059	1	1	1	1	1	2	1	1
1	1	1	2	0	2.51129	0	1	0	1	1	2	1	1
1	1	1	2	1	2.51129	1	1	0	1	1	2	1	0
1	1	1	1	1	2.51129	0	1	1	1	1	2	1	2
1	1	1	2	1	2.51844	1	1	1	1	1	1	1	0
1	1	1	2	1	2.53702	0	1	1	1	1	1	1	2
0	1	0	2	1	2.63067	1	1	0	1	0	2	1	0
1	1	1	2	1	2.63067	1	1	1	1	1	2	1	1
1	1	1	2	1	2.63135	1	1	1	1	1		1	0
0	1	1	2	1	2.6351	1	1	1	1	1	2	1	0
1	1	1	2	1	2.6351	0	1	0	1	0	2	1	2
1	1	1	1	1	2.64414	0	1	1	1	0	1	1	1
1	1	1	1	0	2.64414	0	1	1	1	1	1	1	1
1	1	1	2	1	2.64653	1	1	1	1	1	2	1	1
1	1	1	1	1	2.65019	0	1	1	1	1	2	1	2
0	1	0	2	1	2.66242	1	1	0	1	1	2	1	1
0	1	0	1	1	2.66242	1	1	1	1	0	2	1	0
1	1	1	2	1	2.67503	1	1	1	1	1	2	1	1
0	1	0	2	1	2.69927	0	1	1	1	1	0	1	0
0	1	1	2	1	2.69927	0	1	1	1	0	2	1	1
1	1	1	2	1	2.69995	0	0	1	1	0	1	1	1
1	1	1	2	1	2.72462	1	1	0	1		2	1	1
1	1	1	1	1	2.73145	0	1	1	1	1	2	1	1
1	1	1	2	1	2.73145	1	1	1	1	1	2	1	0
1	1	1	2	1	2.73182	1	1	1	1	1	2	1	0
1	1	1	2	0	2.74987	0	1	0	1	1	1	1	2
0	1	1	2	1	2.75194	1	1	1	1		2	1	0
1	1	1	2	0	2.75569	0	1	1	1	1	0	1	0
0	1	0	1	1	2.75637		1		1	0	2	1	2
1	1	1	2	1	2.75637	1	1	0	1	1	1	1	2
1	1	0	2	1	2.75637	1	1	0	1	0	1	1	1
1	1	1	1	1	2.75717	0	1	1	1	1	2	1	2
1	1	1	2	1	2.75876	0	1	1	1	1	1	1	2
1	1	1	2	0	2.77411	0	1	0	1	0	2	1	0
1	1	1	2	1	2.78301	0	1	0	1	1	1	1	1
0	1	1	2	1	2.78368	0	1	1	1	1	1	1	0
1	1	1	1	1	2.78368	1	1	1	1	1	0	1	2
1	1	1	2	0	2.78368	1	1	1	1	0	2	1	0
1	1	0	2	1	2.78824	1	1	1	1		1	1	1
1	1	0	2	1	2.78824	1	1	1	1	1	2	1	0
0	1	0	2	0	2.79513	1	1	1	1	0	2	1	2
1	1	0	2	1	2.81327	0	1	1	1	0	1	1	0
0	1	1	1	1	2.82737		1	1	1		2	1	0
1	1	0	1	1	2.8713	0	0	0	1	1	0	1	1
1	1	1	2	1	2.87498	1	1	0	1	1	2	1	0
1	1	0	1	1	2.87895	1	1	1	1		2	1	0
0	1	0	2	1	2.92116	1	1	0	1	0	2	1	0
0	1	1	2		2.92482	0	1	1	1	0	1	1	1
1	1	1	2	1	2.92482	1	1	1	1	1	2	1	0
1	1		2	1	2.92482	0	1	0	1	0	2	1	1
0	1	1	2	1	2.9255	1	1	0	1	1	2	1	1
0	1	1	2	1	2.9255	1	1	1	1	1	2	1	1
1	1	0	1	1	2.93386	1	0	1	1	0	2	1	0
0	1	1	2	1	2.94674	1	1	1	1	0	1	1	2
0	1	0	2	1	2.94974	1	1	1	1	1	2	1	0
1	1	1	2	1	2.94974		1	1	1		2	1	0
1	1	1	2	1	2.94974	0	1	1	1	1	1	1	1
0	1	0	1	1	2.95657	1	1	1	1	0	2	1	0
1	1	1	1	1	2.95657	0	1	1	1	1	0	1	2
1	1	1	2	0	2.97871	1	1	1	1	1	2	1	0
1	1	1	2	1	2.98162	1	1	1	1	0	2	1	0
1	1	0	2	1	3.02808	0	1	1	1	1	1	1	1
1	1	1	2	1	3.02808	0	1	1	1	1	0	1	1
1	1	1	2	1	3.02811		1	1	1		2	1	0
0	1	1	2	0	3.04609	1	1	0	1	0	2	1	1
0	1	1	1	0	3.05292	1	0	1	0	0	1	1	0
1	1	1	1	0	3.05292	0	1	1	1	1	0	1	1
1	1	0	2	1	3.05292	1	1	0	1	0	2	1	2
1	1	1	2	1	3.05292	0	1	1	1	1	0	1	1
1	1	1	2	1	3.05292	1	1	1	1	0	2	1	0
1	1	1	2	0	3.05292	0	1	1	1	1	2	1	0
1	1	0	2	1	3.05292		1	0	1		2	1	0
1	1	1	2	0	3.06449	0	1	0	1	1	2	1	2
1	1	1	2	0	3.07244	0	1	0	1	1	2	1	0
1	1	1	2	1	3.07506	1	1	0	1	1	2	1	0
1	1	1	2	0	3.07574	1	1	0	1	0	2	1	1
0	1	1	1	0	3.07716	1	1	0	1	0	2	1	0
1	1	1	2	1	3.07716	1	1	1	1	1	1	1	2
1	1	1	2	1	3.07716	1	1	0	1	1	2	1	2
1	1	1	2	1	3.07716	1	1	1	1	1	1	1	1
0	1	1	2	1	3.07784	1	1	1	1	0	2	1	0
1	1	1	2	1	3.07784	1	1	0	1	1	1	1	1
1	1	0	2	1	3.07784	1	1	1	1	0	2	1	0
1	1	1	2	1	3.07784	1	1	0	1	1	1	1	0
1	1	0	2	0	3.07784	0	1	0	1	1	2	1	1
1	1	1	2	1	3.09181	1	1	1	1		2	1	0
1	1	1	2	1	3.09908	1	1	1	1	1	1	1	1
0	1	0	1	1	3.11938	1	1	0	1	0	1	1	1
1	1	1	2	1	3.12335	1	1	0	1	1	2	1	2
1	1	1	2	1	3.18576	1	1	1	1	1	2	1	1
0	1	0	2	1	3.20404	1	1	1	1	1	2	1	1
1	1	1	2	1	3.20404	1	1	1	1	1	2	1	0
1	1	1	2	0	3.20924	1	1	1	1	1	2	1	2
1	1	1	2	1	3.22828		1	1	1		2	1	1
0	1	1	1	0	3.2409	0	1	0	1	1	2	1	1
1	1	1	2	1	3.27264	1	1	0	1	1	0	1	0
0	1	0	1	1	3.298	1	1	1	1	0	2	1	0
1	1	1	2	1	3.298	1	1	1	1	0	2	1	0
1	1	1	2	1	3.298	1	1	1	1	0	0	1	2
1	1	0	2	0	3.298	0	1	1	1	1	2	1	2
1	1	0	2	0	3.31991	0	1	1	1	1	0	1	1
0	1	1	2	1	3.32224	0	1	1	1	0	1	1	1
1	1	1	2	1	3.32224	1	1	1	1	1	2	1	1
0	1	1	2	1	3.32463	1	1	1	1	1	1	1	2
0	1	1	2	1	3.32463	0	1	1	1	0	0	1	0
1	1	1	2	1	3.32463	1	1	1	1	1	0	1	0
1	1	1	2	1	3.32463	1	1	1	1	1	1	1	0
1	1	0	1	1	3.32463	1	1	0	1	1	2	1	0
0	1	0	2	0	3.32493		1	1	1	0	2	1	0
1	1	1	0	1	3.32531	1	1	1	1	0	2	1	0
1	1	1	2	0	3.32906	0	1	1	1	1	2	1	0
1	1	1	2	1	3.32906	1	1	1	1	0	2	1	1
1	1	1	2	1	3.32906	1	1	1	1	0	2	1	0
1	1	1	2	1	3.35201	1	1	1	1		2	1	0
0	1	0	2	1	3.35638	1	1	1	1	1	2	1	0
0	1	1	2	1	3.35638	0	1	0	1	1	2	1	0
0	1	0	2	1	3.38596	1	1	0	1	0	2	1	0
1	1	1	2	1	3.39114	1	1	1	1	1	0	1	1
0	1	1	2	1	3.39323	1	1	1	1	1	2	1	2
1	1	0	2	1	3.39323	0	1	0	1	1	2	1	0
1	1	1	2	1	3.39391	0	1	1	1	1	1	1	1
1	1	1	2	1	3.43507	1	1	1	1	1	0	1	1
0	1	1	2	1	3.44085		1	0	1	0	2	1	2
0	1	1	2	1	3.49137		1	1	1		2	1	0
0	1	1	2	1	3.49137	1	1	0	1	1	2	1	1
0	1	1	1	1	3.4928	1	1	0	1	0	2	1	2
1	1	1	2	1	3.4928	1	1	1	1	0	2	1	1
0	1	0	2	1	3.4982	0	1	1	1	1	2	1	0
0	1	1	2	1	3.4982		1	1	1	0	2	1	1
1	1	0	2	1	3.4982	1	1	0	1	1	2	1	0
1	1	1	2	1	3.4982	1	1	0	1	1	2	1	0
1	1	1	2	1	3.4982	0	1	0	1	1	2	1	1
1	1	1	2	0	3.4982	1	0	0	1	1	2	1	0
1	1	0	2	1	3.4982	1	1	1	1	0	2	1	0
0	1	0	2	1	3.50655	1	1	0	1		2	1	0
1	1	1	2	1	3.50655	0	1	1	1	1	1	1	2
0	1	1	2	1	3.50723	0	1	0	1	0	2	1	0
1	1	0	1	0	3.52244	1	1	0	1	1	2	1	0
1	1	1	1	1	3.52244	0	1	0	1	0	2	1	0
1	1	1	2	1	3.52324	1	1	0	1	1	2	1	2
1	1	1	2	0	3.53147	0	1	1	1	1	1	1	2
0	1	0	2	1	3.60077	1	1	1	1	0	2	1	0
0	1	0	2	1	3.61879	1	1	1	0		2	1	0
1	1	0	2	1	3.61879	1	1	1	1	1	1	1	0
1	1	1	2	1	3.61879	1	1	1	1	1	0	1	2
1	1	1	2	1	3.61879		1	1	1		2	1
1	1	1	2	1	3.61879	1	1	1	1	1	1	1	0
1	1	1	2	1	3.61879		1	1	1		2	1	0
1	1	1	2	1	3.61879		1	1	1	0	2	1	1
1	1	1	2	1	3.61879		1	1	1		2	1	0
1	1	1	2	1	3.61879	1	1	0	1	0	1	1	0
1	1	1	1	1	3.61879	1	1	1	1	1	2	1	0
1	1	0	2	1	3.61879	1	1	1	1	0	2	1	2
1	1	1	2	1	3.61879		1	0	1		2	1	0
1	1	1	2	1	3.61879	0	1	0	1	1	2	1	2
1	1	1	2	1	3.61879	1	1	0	1	0	2	1	2
1	1	1	2	1	3.61879	0	1	0	1	1	2	1	0
1	1	1	2	1	3.61947	1	1	0	1	1	2	1	0
1	1	1	1	1	3.61947	1	1	0	1	1	1	1	1
0	1	1	1	1	3.64371	0	1	1	1	1	2	1	1
1	1	1	2	1	3.64371	1	1	1	1	0	1	1	2
1	1	1	1	0	3.64403	1	1	1	1	0	2	1	0
0	1		2	1	3.64843	1	1	0	1	1	2	1	0
1	1	1	1	1	3.64843	0	1	0	1	1	1	1	1
1	1	1	2	1	3.65053	1	1	1	1		2	1	0
1	1	1	2	1	3.65053	1	1	0	1	0	2	1	0
1	1	1	2	1	3.65053	1	1	1	1	1	2	1	0
1	1	1	1	0	3.65053	1	1	1	1	0	2	1	1
1	1	0	2	1	3.65053	1	1	0	1		2	1	2
1	1	1	2	1	3.65053	1	1	1	1	1	0	1	1
1	1	1	2	1	3.65053	1	1	1	1	1	2	1	0
1	1	1	2	0	3.65053	1	1	0	1	1	2	1	0
0	1	1	2	1	3.65134	1	1	1	1	1	1	1	0
1	1	1	2	1	3.65134	1	1	1	1	0	2	1	2
0	1	0	1	1	3.66497		1	1	1		2	1	0
1	1	0	2	1	3.67267	0	1	1	1	1	1	1	0
1	1	0	2	1	3.729	1	1	0	1	1	2	1	0
0	1	0	2	0	3.76991	0	1	0	1	0	1	1	0
1	1	0	2	0	3.76991	0	1	0	1	1	2	1	1
1	1	1	2	1	3.76991	1	1	1	1	0	2	1	1
1	1	0	2	1	3.7827	0	1	1	1	0	1	1	2
1	1	1	2	1	3.81427	0	1	1	1	1	1	1	0
1	1	1	1	1	3.81427	0	1	1	1	1	0	1	1
1	1	1	1	1	3.83932	1	0	0	1	0	1	1	1
0	1	1	2	1	3.86386	1	1	1	1	1	1	1	2
1	1	1	2	1	3.86386	1	1	1	1	0	1	1	0
0	1	0	1	1	3.87069	0	0	1	1	1	2	1	2
0	1	1	2	1	3.87069	0	1	1	1	1	2	1	2
1	1	1	2	1	3.87069	0	1	1	1	0	2	1	2
1	1	1	2	1	3.87069	1	1	1	1	1	2	1	1
1	1	1	2	1	3.87069	0	1	1	1	1	0	1	0
1	1	1	2	1	3.87069	0	1	1	1	1	2	1	1
1	1	1	2	1	3.89118	0	1	1	1	1	1	1	2
0	1	1	2	1	3.89493	0	1	0	1		2	1	0
0	1	0	1	1	3.898	0	1	0	1	1	2	1	0
1	1	1	2	1	3.898	1	1	1	1	1	2	1	2
1	1	0	2	1	3.898	1	1	0	1	1	2	1	2
0	1	1	2	1	3.92224	0	1	0	1	0	2	1	1
1	1	1	2	0	3.92224	1	1	1	1	0	2	1	0
1	1	1	2	1	3.92224	1	1	1	1		2	1	1
1	1	1	2	1	3.93486	1	1	1	1	1	2	1	0
1	1	1	2	0	3.93554	1	1	0	1	0	1	1	2
0	1	0	2	1	3.95183	0	1	0	1	0	2	1	0
1	1		2	1	3.95183	1	1	0	1	0	2	1	0
0	1	1	1	0	3.97879	1	0	1	1	1	0	1	2
1	1	1	2	1	3.97879	0	1	0	1	1	0	1	1
1	1	0	2	0	4.04081	0	1	1	1	0	1	1	2
1	1	1	2	1	4.05867	0	1	0	1	0	2	1	1
1	1	1	2	1	4.06406	1	1	1	1	0	2	1	2
1	1	1	2	1	4.06406	1	1	0	1	1	2	1	0
1	1	1	2	1	4.06406	0	1	0	1	1	1	1	1
1	1	1	2	1	4.06406	1	1	1	1		2	1	1
1	1	0	2	1	4.06406	0	1	0	1	1	2	1	1
1	1	1	2	1	4.06406	1	1	1	1		2	1	0
1	1	1	2	1	4.06406	0	1	0	1	1	1	1	1
1	1	0	2	1	4.07993		1	1			2	1	0
1	1	1	2	1	4.09877	1	1	1	1	0	2	1	2
0	1	0	2	1	4.10417	0	1	0	1	1	1	1	2
1	1	1	2	1	4.10417	1	1	1	1		2	1	1
1	1	1	2	1	4.10417	0	1	0	1	1	2	1	2
1	1	1	2	1	4.10497	1	0	1	1	1	1	1	0
1	1	1	2	1	4.17994	1	1	1	1	0	2	1	0
1	1	1	2	1	4.17994	0	1	1	1	1	1	1	0
0	1	0	2	1	4.18533	1	1	1	1		2	1	0
1	1	0	2	1	4.18533	1	1	0	1	1	1	1	0
1	1	1	2	1	4.18533	1	1	1	1	1	2	1	0
1	1	1	2	1	4.18533	1	1	0	1	1	1	1	1
1	1	1	2	1	4.18533	0	1	1	1	1	2	1	2
1	1	0	2	1	4.18676	0	1	0	1	1	2	1	0
0	1	0	2	1	4.19216	1	1	1	1	1	1	1	2
0	1	0	1	1	4.19216	1	1	1	1	0	2	1	0
1	1	1	2	1	4.19216	1	1	0	1		2	1	1
1	1	1	2	1	4.19216	1	1	0	1	1	2	1	0
1	1	1	2	1	4.19216		1	1	1		2	1	0
1	1	1	2	1	4.19216	1	1	1	1	1	1	1	0
1	1	1	1	0	4.19216	0	0	1	1	1	1	1	0
1	1	1	0	1	4.19216	0	1	0	1	0	2	1	0
1	1	1	2	1	4.19216	0	1	1	1	1	1	1	1
1	1	1	2	1	4.19216	1	1	0	1	0	2	1	0
1	1	1	1	1	4.19216	1	1	1	1	0	2	1	2
1	1	1	2	1	4.19216	1	1	1	1		2	1	1
1	1	1	2	1	4.19216	0	1	1	1	1	1	1	2
1	1	1	2	1	4.21408	1	1	0	1	0	2	1	1
1	1	1	2	1	4.21408	1	1	1	1	1	2	1	2
0	1	1	2	1	4.2143	1	1	1	1		2	1	0
0	1	0	1	1	4.2164	1	1	1	1	0	0	1	2
0	1	0	2	1	4.2164		1	0	1		2	1	1
0	1	1	2	1	4.2164	1	1	1	1	1	2	1	2
1	1	1	2	1	4.2164	1	1	0	1	0	2	1	0
1	1	1	2	1	4.2164		1	1	1		2	1	1
1	1	1	2	0	4.2164	1	1	0	1	1	2	1	0
1	1	1	2	1	4.2164		1	1	1	0	2	1	0
1	1	1	2	1	4.2164	0		1	1	1	1	1
1	1	0	1	1	4.2164	1	1	0	1	1	2	1	0
1	1	0	2	1	4.2164	1	1	1	1	0	2	1	0
1	1	0	2	0	4.2164	1	0	1	1	1	2	1	0
1	1	1	1	0	4.2164	1	1	1	1	0	0	1	0
1	1	1	2	1	4.2164	0	1	0	1		2	1	0
1	1	1	2	0	4.2164	1	1	0	1	0	2	1	1
1	1	1	2	0	4.2164	0	1	1	1	1	2	1	0
1	1	1	2	1	4.2164	1	1	0	1	0		1	2
0	1	1	2	1	4.35164	1	1	1	1		2	1	0
1	1	1	2	1	4.38014	1	1	1	1	1	0	1	1
0	1	1	2	1	4.396	1	1	0	1	0	2	1	0
1	1	1	2	1	4.41814	1	1	1	1	0	2	1	2
0	1	1	2	1	4.43656	1	1	0	1		2	1	0
0	1	0	2	1	4.43656	1	1	1	1		2	1	0
0	1	0	2	1	4.43656	1	1	1	1	0	2	1	0
1	1	1	2	1	4.43656	0	1	1	1	0	1	1	2
1	1	1	2	1	4.43656	1	1	0	1	1	1	1	0
1	1	0	2	0	4.43656	1	1	1	1	0	2	1	0
1	1	1	1	1	4.43656	0	1	0	1	0	2	1	0
1	1	0	2	1	4.43656	0	1	1	1	0	2	1	0
1	1	0	2	1	4.43656	1	1	1	1		2	1	0
1	1	1	2	1	4.45847	1	1	1	1	1	2	1	2
0	1	1	2	1	4.46387	1	1	1	1	1	2	1	0
0	1	1	2	1	4.46387	1	1	0	1	1	2	1	0
0	1	1	2	1	4.46387	1	1	1	1	0	2	1	0
0	1	0	2	0	4.46387	0	1	1	1	1	2	1	0
0	1	1	2	1	4.46387	1	1	1	1	0	2	1	0
1	1	1	2	1	4.46387	1	1	1	1	1	2	1	0
1	1	1	1	0	4.46387	0	1	0	1	0	1	1	2
1	1	1	2	1	4.46387	1	1	1	1	1	2	1	0
1	1	1	2	1	4.46387	1	1	0	1	1	2	1	0
1	1	1	2	1	4.46387	1	1	0	1	1	0	1	1
0	1	1	2	1	4.50823	1	1	0	1	1	0	1	1
0	1	0	2	1	4.50823	1	1	1	1	1	2	1	0
0	1	1	1	1	4.50823	1	0	1	1	0	1	1	0
0	1	0	2	1	4.53037	1	1	1	1	0	2	1	0
1	1	1	2	1	4.53037	1	1	0	1	0	2	1	1
1	1	1	2	1	4.53247	1	1	0	1	1	2	1	0
1	1	1	2	1	4.53247	1	1	1	1	0	1	1	2
1	1	0	2	1	4.64579	1	1	0	1	0	2	1	1
1	1	1	2	1	4.64579	1	1	1	1	1	1	1	1
1	1	1	2	1	4.64579	0	1	1	1	1	1	1	0
1	1	1	1	1	4.66771	0	1	1	1	1	2	1	0
0	1	0	2	0	4.75263	0	1	1	1	0	2	1	0
1	1	1	2	1	4.75263	1	1	0	1	0	2	1	1
0	1	1	1	1	4.75803	0	1	1	1	0		1	0
0	1	0	2	1	4.75803	1	1	1	1	1	2	1	1
0	1	1	2	1	4.75803	0	1	1	1	0	2	1	1
0	1	1	2	1	4.75803	1	1	1	1	1	2	1	1
0	1	1	2	1	4.75803	1	1	1	1	0	2	1	0
0	1	0	1	0	4.75803	0	1	0	1	1	2	1	0
0	1	0	1	1	4.75803	0	1	1	1	1	2	1	0
0	1	0	2	1	4.75803	1	1	1	1	1	2	1	0
[truncated: 82 more rows]

## Sheet: Table 3_GendNorms
PROVINCE	38_Education	39_DecisionEq	40_MarConsent	41_FreeExpr	42_Iddiversity	43_non-stigm	44_RepMat	45_FreeIPV	46_BodAut	47_MatHealth	48_RelAut
1	1	4	2	4	4	2	4	2	4	4	4
1	1	3	3	3	4	3	4	4	2	3	4
1	1	1		3	4	5	3	2	2	1	5
1	1	3	1	2	1	1	1	3	3	1	5
1	1	5	2	4	4	4	4	2	2	4	4
1	1	1	5	1	5	5	5	5	5	5	1
1	1	4	4	2	2	4	2	4	5	2	2
1	1	1	1	3	5	1	2	2	4	1	1
1	1	4	4	2	2	2	2	2	4	4	4
1	1	2	4	2	5	2	2	2	2	4	4
2	1	5	1	1	5	1	5	5	2	1	4
2	1	5	3	5	3	3	3	5	5	5	5
2	1	2	4	5	5	4	5	5	5	4	1
2	1	5	1	1	1	4	1	1	4	5	5
2	1	5	2	4	5	5	5	3	3	3	3
2	1	5	1	3	3	3	3	3	3	3	3
2	1	5	1	5	3	3	3	3	3	3	3
2	1	5	1	5	2	5	1	4	4	4	2
2	1	3	5	1	1	1	3	1	3	2	1
2	1	2	1	5	1	5	1	1	1	1	1
2	1	2	5	2	5	1	2	2	1	5	2
2	1	1	1	1	1	3	5	1	5	1	1
3	1	2	2	1	2	2	2	2	2	3	4
3	1	4	2	3	5	4	3	4	5	4	5
3	1	1	3	1	4	4	2	3	3	1	1
3	1	4	4	4	4	4	2	2	4	2	3
3	1	1	2	3	1	3	2	1	3	4	3
3	1	2	3	1	2	2	2	2	5	2	4
3	1	3	4	3	1	3	1	3	3	1	1
3	1	1	5	4	1	2	4	1	3	4	5
3	1	1	4	3	1	2	2	1	2	2	5
3	1	4	4	4	1	2	5	2	2	4	1
3	1	1	1	5	4	5	1	1	5	1	5
1	2		2	3	4	2	2	2	3	4	4
1	2	2	2	2	4	2	4	4	4	2	4
1	2	2	4	2	2	5	2	5	5	4	5
1	2	4	2	4	4	4	4	4	4	5	2
1	2	2	2	4	4	2	2	4	3	3	4
1	2	4	3	3	4	3	2	3	4	2	2
1	2	2	2	4	2	2	2	2	3	2	2
1	2	4	2	2	2	2	2	2	2	2	4
1	2	2	2	2	2	2	2	2	2	4	4
1	2	4	2	4	4	4	4	4	3	4	4
1	2	4	4	2	4	2	2	4	4	3	4
1	2	2	2	4	4	4	3	4	3	4	4
1	2	2	2	2	2	3	2	3	4	3	4
1	2	4	2	2	4	2	2	2	3	3	4
1	2	4	4	2	4	4	2	4	2	4	4
1	2	2	2	2	4	1	4	4	1	4	2
1	2	3	4	4	2	4	2	2	4	2	3
1	2	4	4	3	4	3	4	3	3	3	4
1	2	2	4	2	2	2	4	2	4	4	4
1	2	4	4	2	2	4	2	3	4	2	2
1	2	2	2	2	2	2	4	2	4	2	4
1	2	2	3	2	3	3	4	4	4	4	4
1	2	2	2	2	4	2	2	3	3	2	4
1	2	4	3	4	2	2	4	4	3	3	4
1	2	2	2	2	4	3	4	2	4	3	4
1	2	2	2	2	4	2	2	2	2	2	4
1	2	2	4	4	4	2	2	2	4	4	4
1	2	4	2	3	4	4	4	4	4	2	2
1	2	4	4	2	4	4	2	4	2	2	2
1	2	2	2	4	4	4	2	4	2	2	4
1	2	2	2	2	2	2	2	4	4	2	4
1	2	2	2	2	2	3	2	4	4	4	4
1	2	2	2	3	1	2	2	3	3	3	3
1	2	4	2	2	4	4	2	4	4	2	2
1	2	4	4	4	4	4	4	4	4	2	4
1	2	2	2	2	2	2	2	2	2	4	4
1	2	4	2	4	2	2	2	2	2	2	2
1	2	4	4	4	4	4	4	4	4	4	4
1	2	4	4	4	2	4	4	4	2	4	4
1	2	2	2	2	3	2	2	2	2	3	4
1	2	2	2	2	2	4	4	2	4	2	4
1	2	2	4	2	4	4	4	4	2	4	4
1	2	3	3	3	3	3	3	3	3	3	4
1	2	1	2	3	3	4	4		2	1	4
1	2	3		3	4	4	2	4	4	3	5
1	2	2	2	4	4	2	2	2	4	2	2
1	2	4	4	4	4	4	2	4	3	4	4
1	2	2	2	3	4	2	1	4	2	1	4
1	2	2	2	4	4	4	2	2	1	2	2
1	2	4	3	4	2	2	2	4	4	2	4
1	2	2	3	2	4	4	2	4	2	3	4
1	2	1	2	3	4	4	2	1	3	1	5
1	2	2	4	4	2	2	4	4	4	2	2
1	2	4	4	4	4	4	4	3	4	4	4
1	2	4	4	2	4	4	3	2	3	3	4
1	2	3	3	4	2	4	4	4	4	2	4
1	2	4	4	2	2	2	2	4	4	4	4
1	2	4	3	4	4	2	2	2	2	2	2
1	2	4	3	4	4	2	4	4	4	4	2
1	2	2	3	4	2	2	4	1	4	4	2
1	2	4	4	4	4	4	4	4	4	2	4
1	2	4	3	3	4	3	3	3	4	3	3
1	2	4	3	4	2	2	5	5	5	2	2
1	2	3	4	2	4	2	2	2	2	2	2
1	2	4	2	2	4	2	2	2	2	4	2
1	2	4	2	2	2	4	2	3	4	2	4
1	2	1	5	2	1	4	2	4	4	3	3
1	2	2	2	2	4	3	4	4	4	2	4
1	2	4	3	3	4	3	3	4	4	2	3
1	2	2	2	3	3	4	4	4	4	4	4
1	2	4	3	3	4	2	2	1	1	3	2
1	2	4	3	4	4	4	2	3	2	3	4
1	2	3	4	2	4	4	5	1	2	2	4
1	2	4	4	4	4	2	2	2	4	2	2
1	2	1	1	3	3	2	1	2	4	1	5
1	2	1	1	3	4		1	1	4	2	3
1	2	4	4	2	2	2	2	1	2	4	3
1	2	2	4	5	2	2	2	2	2	4	4
1	2	2	4	4	4	4	4	2	2	2	2
1	2	4	4	2	2	1	2	4	4	2	2
1	2	2	4	2	2	2	4	2	1	2	4
1	2	4	4	2	4	4	2	4	4	2	4
1	2	5	4	4	2	2	2	4	2	2	4
1	2	3	3	2	4	2	4	4	4	2	4
1	2	2	2	2	4	2	4	4	4	2	4
1	2	4	2	4	4	4	4	4	4	2	2
1	2	3	4	4	4	3	4	4	4	2	4
1	2	2	2	2	4	2	4	4	2	4	2
1	2	2	2	2	3	2	4	2	4	2	4
1	2	3	1	2	2	4	4	2	3	2	4
1	2	4	4	2	2	2	4	2	2	2	4
1	2	4	4	4	4	1	3	4	4	2	3
1	2	2	3	2	2	3	4	4	2	2	2
1	2	4	4	4	1	3	2	3	4	4	4
1	2	2	2	4	4	4	3	4	4	3	5
1	2	2	2	5	2	2	4	4	4	4	4
1	2	2	4	4	4	4	4	2	2	2	4
1	2	4	2	3	2	2	2	2	2	2	2
1	2	1	3	3	1	4	1	3	3	3	1
1	2	2	3	4	2	2	4	2	2	2	2
1	2	4	3	4	2	4	2	4	4	2	4
1	2	2	4	2	2	3	2	2	2	4	4
1	2	3	4	4	2	4	2	4	2	2	4
1	2	2	4	2	2	3	2	2	4	2	4
1	2	2	2	2	2	3	2	4	2	4	4
1	2	2	2	4	4	4	2	4	4	4	4
1	2	4	4	3	4	4	4	4	3	2	2
1	2	2	2	4	2	2	4	4	4	4	4
1	2	4	4	2	2	2	2	2	3	2	2
2	2	2	5	4	2	4	2	4	4	4	4
2	2	4	1	4	4	4	4	4	5	2	5
2	2	2	2	4	4	4	4	4	4	4	4
2	2	2	3	2	2	2	2	3	4	1	3
2	2	1	1	2	2	3	3	2	4	1	2
2	2	3	4	2	2	3	2	2	3	2	4
2	2	3	4	3	3	3	3	4	4	3	3
2	2	2	3	2	2	4	2	2	2	2	3
2	2	2	4	4	2	3	2	2	3	2	4
2	2	4	3	4	2	4	2	4	4	3	2
2	2	4	4	4	2	4	2	4	4	4	2
2	2	4	2	4	2	2	3	4	4	4	4
2	2	2	1	2	2	3	1	2	3	1	3
2	2	4	2	2	2	3	2	2	3	2	3
2	2	2	2	2	2	4	2	2	3	2	3
2	2	2	2	2	4	2	2	4	2	2	2
2	2	3	2	2	4	4	4	4	3	3	4
2	2	4	4	4	3	3	2	3	4	3	3
2	2	2	2	2	2	3	2	2	4	2	3
2	2	4	2	2	3	4	2	2	4	2	3
2	2	4	4	3	2	4	2	2	3	3	2
2	2	1	1	2	2	3	3	1	4	2	3
2	2	3	3	4	4	4	2	3	4	2	2
2	2	4	3	3	4	4	2	2	3	3	3
2	2	4	3	4	2	4	3	4	4	4	4
2	2	4	2	3	2	2	2	2	2	3	2
2	2	2	2	2	2	4	2	3	4	3	4
2	2	4	4	4	4	4	2	4	4	4	4
2	2	3	4	2	2	4	4	2	3	2	4
2	2	2	3	3	2	4	2	2	2	3	4
2	2	2	4	2	4	3	4	4	4	3	4
2	2	4	2	2	2	2	4	4	3	4	4
2	2	3	3	4	3	4	3	5	3	4	5
2	2	4	2	4	4	4	4	4	4	4	4
2	2	4	2	4	4	2	4	4	4	4	4
2	2	5	1	1	2	1	3	1	2	2	3
2	2	4	2	4	4	4	4	4	4	4	4
2	2	2		3	2	2	1	2	4	2	4
2	2	1	1	1	1	1	1	1	1	1	1
2	2	2	2	4	4	4	3	4	4	4	4
2	2	3	4	4	2	4	2	4		2	4
2	2	2	2	4	2	2	2	2	3	2	2
2	2	2	4	4	4	4	5	2	5	4	4
2	2	2	2	4	2	2	1	2	4	2	4
2	2	2	4	2	4	4	2	2	2	2	4
2	2	2	1	1	5	2	5	1	3	3	2
2	2	1	1	2	2	4	3	1	4	2	3
2	2	3	3	4	3	2	2	3	4	4	4
3	2	3	2	4	5	4	4	4	5	4	2
3	2	4	1	4	1	5	4	1	1	2	4
3	2	2	4	2	2	4	2	2	2	5	5
3	2	5	1	2	2	2	2	2	2	4	1
3	2	3	3	4	2	2	2	4	2	2	4
3	2	4	1	2	2	5	5	2	1	2	5
3	2	1	1	2	3	1	2	4	1	5	2
3	2	4	1	2	2	5	4	2	4	1	4
3	2	4	4	4	4	4	4	4	5	4	5
3	2	2	2	4	4	4	1	2	4	3	4
3	2	2	3	4	1	2	2	2	1	3	3
3	2	2	4	2	2	4	4	2	4	4	4
3	2	3	2	2	2	2	2	3	2	2	2
3	2	2	2	4	4	2	4	3	4	3	5
3	2	1	2	2	1	4	4	2	1	2	1
3	2	2	4	2	2	2	2	4	2	4	4
3	2	2	4	4	2	4	2	2	2	2	2
3	2	2	4	2	2	4	2	2	4	4	4
3	2	4	4	2	2	2	2	4	4	2	4
3	2	3	4	2	4	3	3	4	3	2	4
3	2	2	4	1	2	1	1	2	2	4	5
3	2	3	3	3	1	3	4	2	5	1	2
3	2	2	3	4	4	2	2	2	4	2	4
3	2	2	2	2	4	2	2	4	2	2	2
3	2	2	2	2	2	4	2	4	2	2	2
3	2	4	2	3	5	2	2	4	2	3	3
3	2	1	2	4	2	4	2	2	5	2	2
3	2	2	2	5	4	4	2	2	4	2	2
3	2	2	2	2	2	4	2	2	2	2	4
3	2	2	4	2	2	4	2	4	2	2	2
3	2	2	1	4	4	4	2	5	4	2	4
3	2	3	2	4	4	4	2	2	4	4	4
3	2	3	3	4	4	3	2	4	4	4	2
3	2	2	4	2	2	2	2	2	2	2	4
3	2	2	2	2	2	2	2	4	3	2	4
3	2	4	2	4	1	5	2	1	4	2	4
3	2	3	3	3	2	3	3	5	5	1	4
3	2	4	2	5	5	4	2	2	4	2	4
3	2	4	4	4	5	3	3	5	3	5	5
3	2	4	4	4	1	3	4	2	2	3	3
3	2	2	2	2	2	4	2	4	2	2	4
3	2	4	3	2	1	2	2	4	5	3	4
3	2	2	2	2	4	4	4	2	3	2	2
3	2	2	2	1	2	2	4	2	2	2	2
3	2	2	4	4	2	3	2	1	5	2	4
3	2	4	4	2	2	4	2	4	4	4	4
3	2	2	2	4	1	1	1	3	2	2	3
3	2	2	2	2	2	2	2	3	3	3	2
3	2	2	3	4	2	4	4	4	2	3	5
3	2	2	4	2	2	4	2	4	4	1	3
3	2	1	4	2	1	3	1	3	3	3	3
3	2	4	4	4	1	4	1	4	3	2	3
3	2	2	4	2	3	5	1	4	2	2	4
3	2	2	3	3	4	2	4	1	4	2	5
3	2	2	2	2	4	2	2	2	1	2	4
1	3	4	5	3	4	3	3	3	2	4	2
1	3	2	2	3	2	2	3	4	4	3	4
1	3	3	4	4	4	4	2	4	4	2	4
1	3	1	2	3	4	4	5	3	4	2	3
1	3	2	3	3	3	4	4	3	2	3	4
1	3	4	3	3	2	2	4	4	4	4	4
1	3	2	3	4	4	4	3	4	4	3	4
1	3	4	3	2	3	3	2	4	3	4	2
1	3	2	3	1	1	5	4	4	2	3	3
1	3	3	4	4	4	4	4	5	4	4	4
1	3	1	1	3	2	2	3	4	3	2	5
1	3	3		3	5	4	4	2	3	2	5
1	3	3	2	4	4	3	2	3	3	3	4
1	3	4	1	2	5	4	4	4	4	2	4
1	3	2		2	3	3	4	4	4	2	3
1	3	2	3	2	3	3	4	3	4	3	2
1	3	2	2	2	2	4	2	3	2	2	3
1	3	3	4	2	2	2	4	4	3	4	2
1	3	4	4	4	4	4	4	4	4	4	4
1	3	4	4	4	4	4	4	4	4	4	4
1	3	2	3	3	3	2	4	3	4	2	3
1	3	4	2	4	2	2	3	4	3	2	4
1	3	3	3	3	3	4	4	3	4	4	4
1	3	3	3	3	3	3	4	4	4	4	4
1	3	3	2	3	4	4	4	3	4	2	4
1	3	4	3	2	4	4	2	4	2	2	4
1	3	3	4	4	4	3	2	3	2	4	4
1	3	3	4	5	3	4	4	3	3	3	4
1	3	4	4	5	4	4	4	5	5	4	4
1	3	2	2	4	4	4	4	4	4	4	4
1	3	4	3	4	4	4	2	4	4	3	4
1	3	2	3	4	4	2	4	4	4	3	4
1	3	2	2	2	2	4	4	4	4	2	4
1	3	1	3	3	3	3	4	4	4	4	4
1	3	2	2	2	2	2	4	4	4	2	4
1	3		2	4	4	4	2	2	2	2	2
1	3	4	4	4	4	4	4	4	4	4	4
1	3	2	4	2	1	2	3	3	1	2	3
1	3	1	3	5	5	4	5	5	4	3	5
1	3	2	3	2	4	3	4	2	4	2	3
1	3	3	3	4	2	3	5	5	4	4	5
1	3	1	5	5	1	1	5	1	5	5	4
1	3	2	3	3	4	4	4	4	3	4	4
1	3	3	3	4	4	2	2	3	4	3	4
1	3	4	2	2	2	2	2	4	3	2	3
1	3	2	4	2	2	3	2	3	4	3	4
1	3	1	1	3	3	3	5	5	5	1	5
1	3	4	2	3	3	4	4	4	4	2	4
1	3	3	2	4	2	2	2	2	2	2	4
1	3	2	3	4	3	4	2	4	4	2	4
1	3	2	4	4	2	2	4	4	4	4	4
1	3	4	4	3	3	3	3	3	3	3	4
1	3	3	3	3	4	3	2	4	5	2	4
1	3		2	2	2	4	4	4	4	4	4
1	3	4	4	4	2	2	4	4	4	4	4
1	3	3	3	2	2	3	4	4	5	4	4
1	3	4	2	2	4	2	4	4	4	4	4
1	3	3	3	4	4	3	4	3	4	3	4
1	3	3	3	4	4	3	4	3	4	3	4
1	3	4	3	3	2	2	2	2	3	2	2
1	3	3	2	2	2	2	2	2	2	4	2
1	3	4	2	5	3	2	4	4	4	4	4
1	3	4	2	4	4	4	4	4	4	2	4
1	3	1	2	1	2	4	1	2	5	2	4
1	3	4	4	4	4	2	2	4	4	4	4
1	3	2	4	4	3	2	3	2	2	3	4
1	3	3	3	3	3	3	3	3	3	3	2
1	3	3	3	3	4	4	2	3	3	2	5
1	3	4	3	3	4	2	1	1	1	5	1
1	3	2	4	3	1	2	2	2	4	2	2
1	3	2	3	3	3	2	4	2	4	4	4
1	3	3	2	2	2	4	2	2	3	2	4
1	3	2	2	1	4	1	4	2	4	2	4
1	3	2	5	1	1	2	4	2	4	2	4
1	3	2	3	3	4		4	1	4	2	5
1	3	1	3	3	4		2	4	5	1	4
1	3	2	2	2	3	4	4	2	4	4	4
1	3	1	2	3	4	4	4	1	4	2	5
1	3	2	5	1	4	4	4	4	4	3	4
1	3	4	4	4	5	4	4	4	5	1	3
1	3	3	2	4	4	4	2	4	3	4	4
1	3	3	4	4	4	4	4	4	4	4	4
1	3	3	3	3	2	2	2	3	3	3	4
1	3	3	3	2	2	2	2	4	4	2	4
1	3	4	5	1	1	1	1	4	1	3	3
1	3	3	4	2	4	2	4	4	4	4	4
1	3	4	2	4	2	2	4	2	2	4	5
1	3	2	3	2	3	4	3	4	4	3	4
1	3	3	3	4	2	2	2	4	4	3	4
1	3	4	3	4	2	2	3	4	4	4	4
1	3	2	1	3	4	5	5	4	4	3	4
1	3	3	4	4	3	4	4	5	5	4	4
1	3	3	5	3	2	2	4	4	4	4	4
1	3	2	3	2	4	4	2	2	4	3	4
1	3	4	4	4	4	3	4	5	5	4	4
1	3	2	4	4	4	2	4	4	4	4	4
1	3	4	4	3	4	4	4	4	4	4	4
1	3	2	3	4	4	4	5	4	4	4	4
1	3	4	2	4	3	2	4	2	4	4	4
1	3	2	3	2	2	3	3	3	2	3	4
1	3	3	2	3	3	2	3	3	3	4	4
1	3	4	3	3	2	3	3	4	4	3	4
1	3	4	2	4	4	4	2	2	2	2	2
1	3	3	3	3	4	4	2	4	4	2	4
1	3	3	3	3	3	4	4	4	4	4	4
1	3	3	4	3	4	3	4	3	3	4	4
1	3	3	2	4	3	4	4	4	5	3	3
1	3	4	2	4	4	4	4	4	4	4	4
1	3	2	4	4	2	2	2	4	4	4	4
1	3	2	5	3	4	4	4	5	3	2	5
1	3	2	3	2	4	2	4	4	4	4	4
1	3	4	4	4	4	3	4	2	4	4	4
1	3	2	2	5	1	2	5	5	1	1	2
1	3	2	3	2	4	3	4	4	4	4	4
2	3	2	4	3	2	4	1	3	3	2	2
2	3	2	2	4	2	3	2	2	3	4	4
2	3	4	3	4	5	4	2	5	3	4	5
2	3	2	4	4	1	4	2	4	3	2	2
2	3	3	3	3	3	3	3	3	2	1	5
2	3	3	3	2	4	4	4	3	4	2	4
2	3	3	1	1	1	1	3	5	3	3	3
2	3	4	3	3	2	4	2	2	4	2	4
2	3	4	4	4	3	2	2	3	4	3	3
2	3	2	3	2	2	3	4	3	3	2	4
2	3	3	4	2	2	2	2	3	3	3	4
2	3	4	1	4	2	2	2	2	4	3	3
2	3	2	3	2	4	2	4	4	4	2	2
2	3	2	4	2	4	4	4	5	5	3	5
2	3	2	4	2	2	2	3	4	4	2	2
2	3	2	2	2	2	3	1	2		1	3
2	3	3	3	3	3	3	3	3	2	3	3
2	3	3	3	3	3	3	3	3	3	3	3
2	3	4	2	4	4	4	4	3	4	4	2
2	3	2	4	4	4	4	4	4	4	4	4
2	3	4	3	3	2	4	1	2	2	3	3
2	3	3	4	4	2	4	3	2	4	4	2
2	3	2	4	4	4		4	4	3	2	2
2	3	2	4	4	1	3	4	3	4	2	3
2	3	3	1	2	4	2	4	2	4	2	1
2	3	2	2	2	2	3	3	2	4	2	3
2	3	3	3	3	3	3	3	3	3	3	3
2	3	4	3	3	2	2	2	3	4	2	2
2	3	3	3	3	3	3	3	3	3	3	3
2	3	3	2	2	2	5	4	5	3	3	2
2	3	3	3	3	3	4	3	3	3	3	3
2	3	3	4	4	4	2	1	3	3	3	2
2	3	3	2	4	2	2	2	3	3	3	3
2	3	2	2	2	2	4	2	2	4	3	4
2	3	2	3	3	2	2	2	4	3	2	4
2	3	2	2	4	2	4	3	3	4	4	3
2	3	4	3	3	2	3	2	4	2	3	3
2	3	3	3	3	3	2	2	3	1	4	3
2	3	3	3	3	3	3	3	3	3	3	2
2	3	3	3	3	3	3	2	5	1	4	2
2	3	4	3	4	4	4	3	4	3	4	3
2	3	3	5		5		4	5	4	4	4
2	3	4	4	2	4	2	4	4	5	5	5
2	3	2	4	4	3	4	4	4	4	4	4
2	3	3	2	4	2	2	2	2	4	4	4
2	3	2	2	4	4	2	4	4	4	3	4
2	3	2	2	3	4	2	4	4	4	3	4
2	3	3	4	3	2	2	3	4	3	3	4
2	3	1	2	1	1	1	1	1	3	1	3
2	3	4	3	4	2	4	3	3	4	3	4
2	3	2	3	4	2	4	4	4	4	4	4
2	3	1	1	2	4	4	4	4	4	1	4
2	3	1	2	2	4	3	5	3	4	2	3
2	3	3	4		2	3	3	2	3	3	4
2	3	4	2	4	2	2	2	4	2	2	2
2	3	1	1	2	4	4	2	1	4	2	3
2	3	2	3	4	2	4	2	4	4	4	4
3	3	4	3	4	3	4	4	4	2	4	3
3	3	3	4	2	4	4	2	4	2	5	3
3	3	2	1	4	2	2	2	2	3	4	4
3	3	3	3	3	3	3	3	3	3	4	2
3	3	3	2	4	4	5	2	3	4	2	4
3	3	1	4	4	1	1	1	4	3	4	5
3	3	5	5	2	1	4	1	1	1	4	5
3	3	2	4	2	4	4	4	4	2	4	3
3	3	3	3	3	2	3	3	2	4	3	4
3	3	4	2	4	4	2	4	4	4	3	3
3	3	2	2	4	2	4	2	4	5	4	4
3	3	2	2	4	2	2	2	2	4	3	5
3	3	2	3	2	3	2	3	1	2	4	5
3	3	3	4	3	2	5	2	3	2	2	4
3	3	4	4	2	2	4	3	5	3	5	1
3	3	5	3	5	1	5	1	5	2	1	4
3	3	4	3	2	4	3	1	3	1	2	5
3	3	2	4	4	4	2	4	2	4	2	4
3	3	5	1	2	1	5	5	2	1	5	5
3	3	1	1	2	1	2	5	5	2	5	2
3	3	2	2	1	4	4	2	1	4	1	1
3	3	4	2	2	2	4	2	2	4	2	3
3	3	3	2	2	4	2	2	4	4	4	2
3	3	3	3	3	3	4	2	2	2	3	5
3	3	2	4	2	1	2	1	2	3	1	2
3	3	4	1	4	3	5	2	2	2	4	4
3	3	2	4	4	1	2	2	2	3	3	3
3	3	2	4	4	4	4	2	4	4	4	4
3	3	4	4	2	4	4	2	4	4	4	4
3	3	1	4	1	2	3	2	2	4	2	4
3	3	3	3	2	2	2	2	3	2	2	3
3	3	4	2	3	1	3	1	4	3	3	3
3	3	4	4	2	4	4	2	2	4	4	4
3	3	4	2	2	4	4	2	4	4	4	4
3	3	4	3	4	4	2	5	4	4	1	2
3	3	4	2	2	2	4	2	4	4	2	3
3	3	1	1	2	1	5	3	4	1	3	5
3	3	2	2	4	2	4	2	2	4	2	3
3	3	3	5	4	5	3	2	3	3	3	5
3	3	2	4	1	1	3	2	2	4	2	5
3	3	2	2	2	2	4	2	3	5	1	4
3	3	1	4	1	1	2	1	5	4	1	2
3	3	1	2	4	2	2	1	1	5	1	2
3	3	2	2	4	1	1	2	3	3	2	4
3	3	4	4	3	1	2	2	4	2	4	5
3	3	2	4	3	2	3	3	4	4	3	4
3	3	4	4	2	2	3	2	4	4	4	4
3	3	2	3	3	3	3	2	2	3	3	3
3	3	4	2	4	2	2	2	2	3	4	3
3	3	2	2	2	2	2	2	2	4	2	2
3	3	4	4	2	4	4	2	2	4	2	4
3	3	2	2	2	2	4	2	2	2	2	4
3	3	2	4	2	2	4	2	2	4	4	4
3	3	4	4	2	2	4	4	4	4	4	4
3	3	4	4	4	2	3	2	4	4	2	3
3	3	2	4	2	2	2	2	4	4	4	4
3	3	4	4	2	2	2	2	2	4	2	2
3	3	4	2	2	4	2	2	2	4	3	4
3	3	2	2	2	3	3	2	2	3	2	4
3	3	2	4	2	2	3	2	4	4	4	4
3	3	3	4	2	1	3	1	3	4	1	5
3	3	3	2	3	3	3	1	3	5	1	5
3	3	4	4	2	2	3	2	4	4	4	4
3	3	4	4	2	2	4	3	4	4	4	4
3	3	1	3	4	1	2	3	3	5	3	5
3	3	1	5	1	1	1	1	5	1	1	5
3	3	4	4	4	2	3	3	4	3	2	3
3	3	4	2	4	2	4	2	4	3	2	2
3	3	4	4	2	2	2	2	4	4	4	4
3	3	4	4	2	2	3	2	4	4	4	4
3	3	4	4	2	2	4	2	4	4	4	4
3	3	2	2	4	4	4	3	3	3	3	3
3	3	2	4	2	4	4	2	4	4	4	4
3	3	2	4	2	2	4	2	4	4	4	4
3	3	2	4	2	4	2	2	4	4	4	4
3	3	4	4	2	4	4	2	4	4	4	4
3	3	2	2	2	2	4	2	3	4	4	4
1	4	2	4	2	4	4	4	4	4	4	4
1	4	2	5	4	2	1	4	4	4	3	4
1	4	2	4	2	2	2	4	4	4	4	4
1	4	3	4	4	4	4	2	4	4	2	4
1	4	2	2	4	4	4	4	4	4	3	4
1	4	2	4	4	4	4	4	3	4	3	4
1	4	2	4	2	4	2	3	2	4	2	4
1	4	2	4	4	4	4	4	3	4	4	4
1	4	2	2	3	2	2	2	4	4	4	4
1	4	2	2	2	2	2	4	4	4	4	4
1	4	2	4	2	3	3	3	3	3	3	4
1	4	2	4	4	2	4	2	4	4	4	4
1	4	4	2	4	4	4	4	2	4	2	4
1	4	4	2	4	4	4	4	4	4	4	4
1	4	3	4	3	4	4	4	4	4	2	4
1	4	2	4	2	2	2	2	2	3	3	4
1	4	2	3	2	3	2	2	3	4	4	4
1	4	1	2	3	4	5	5	4	4	3	4
1	4	4	4	4	4	2	4	4	4	4	4
1	4	2	2	4	4	4	4	4	4	2	4
1	4	2	4	2	4	2	4	2	2	4	4
1	4	3	4	4	4	4	2	4	4	3	4
1	4	2	3	2	2	4	4	2	2	4	4
1	4	4	3	4	4	3	4	4	4	3	4
1	4	2	3	3	2	2	2	2	3	1	2
1	4	2	3	2	3	4	2	4	4	2	2
1	4	3	4	4	4	4	4	4	4	4	4
1	4	4	2	4	4	4	4	4	4	3	4
1	4	2	4	2	4	4	2	4	4	2	4
1	4	1	4	2	4	2	4	4	5	4	5
1	4	2	2	2	2	2	4	4	4	4	4
1	4	2	2	4	4	4	2	4	4	4	4
1	4	3	4	4	2	2	2	4	5	4	4
1	4	2	3	4	4	2	4	3	4	4	4
1	4	2	3	3	4	2	4	4	4	3	4
1	4	4	4	2	4	4	2	3	4	4	4
1	4	2	4	2	3	4	2	4	4	4	4
1	4	1	2	3	5	4	5	2	4	4	5
1	4	3	3	4	2	3	2	3	2	3	4
1	4	4	4	2	4	4	4	4	5	4	4
1	4	2	2	5	5	1	2	5	1	4	4
1	4	4	2	4	3	2	2	4	4	2	2
1	4	2	4	4	3	2	4	4	4	4	2
1	4	4	2	4	4	4	4	4	4	4	4
1	4	4	4	4	2	2	2	2	2	3	2
1	4	4	2	4	2	2	4	4	4	2	2
1	4	3	4	4	4	4	4	4	4	3	5
1	4	4	4	4	4	4	3	4	4	3	4
1	4	2	3	2	4	4	2	4	4	4	4
1	4	2	4	4	4	2	2	4	4	4	4
1	4	2	3	2	3	3	4	4	4	3	4
1	4	4	2	4	2	2	2	4	4	4	2
1	4	4	2	2	4	3	4	4	4	4	4
1	4	3	2	3	2	2	4	4	4	4	4
1	4	4	3	4	2	4	4	4	1	3	2
1	4	4	3	2	2	4	3	4	4	4	2
1	4	3	3	4	4	3	4	4	2	4	4
1	4	3	2	2	3	2	4	2	2	4	4
1	4	3	2	2	3	3	3	3	2	4	4
1	4	2	4	2	4	4	4	4	4	4	4
1	4	3	2	2	4	2	4	2	3	4	4
1	4	2	2	4	4	4	4	4	3	4	2
1	4	3	3	3	4	4	4	4	4	4	4
1	4	2	4	4	3	4	4	4	4	3	4
1	4	2	4	4	3	4	2	4	4	3	4
1	4	1	4	4	4	4	4	4	5	3	4
1	4	2	2	2	4	4	4	4	4	4	4
1	4	2	4	4	5	4	2	4	5	4	4
1	4	1	2	2	1	4	4	4	4	2	4
1	4	2	4	3	4	4	3	4	4	2	4
1	4	2	4	2	2	4	2	4	4	4	4
1	4	3	4	4	4	4	2	4	4	3	4
1	4	4	4	3	3	4	4	4	4	3	4
1	4	2	2	2	4	2	4	4	2	4	3
1	4	4	4	4	4	4	4	4	5	4	4
1	4	4	4	4	4	4	4	4	4	4	4
1	4	2	5	4	4	4	5	4	5	4	4
1	4	3	4	2	4	4	4	4	4	3	4
1	4	2	2	2	3	2	4	2	2	2	2
1	4	2	2	2	2	2	4	2	4	4	4
1	4	3	4	4	4	4	4	4	3	4	4
1	4	2	4	2	4	4	2	4	4	4	2
1	4	4	4	5	1	5	2	5	5	1	4
1	4	2	2	4	4	4	2	4	4	3	4
1	4	3	3	2	4	4	4	5	5	2	4
1	4	3	4	4	4	4	2	4	4	2	4
1	4	5	4	5	4	4	4	4	4	4	4
1	4	4	4	4	4	3	4	4	4	2	4
1	4	2	4	4	4	4	4	4	4	4	4
1	4	2	2	4	2	2	2	4	4	4	4
1	4	3	3	4	4	2	4	4	3	3	4
1	4	2	2	4	4	2	4	4	4	4	4
1	4	2	4	2	4	4	4	4	4	4	4
1	4	3	4	2	2	4	2	2	3	3	3
1	4	2	3	2	2	4	4	4	2	4	2
1	4	3	4	4	2	3	4	4	4	4	4
1	4	4	4	2	4	4	4	4	4	4	4
1	4	2	4	2	2	4	2	2	2	2	2
1	4	3	2	2	3	4	4	4	4	4	4
1	4	4	4	2	4	4	4	4	4	4	4
1	4	4	2	4	3	4	3	4	4	4	4
1	4	4	3	4	4	4	3	3	2	3	5
1	4	2	2	2	4	4	2	4	2	4	4
1	4	2	3	3	3	3	2	4	2	4	4
1	4	3	4	3	4	4	4	4	4	4	4
1	4	3	4	4	4	2	2	4	4	4	4
1	4	3	4	3	4	4	4	3	3	2	4
1	4	3	2	4	4	4	4	4	4	2	4
1	4	2	4	4	4	4	4	4	4	4	4
1	4	2	2	3	4	4	4	5	4	2	5
1	4	4	3	4	4	4	4	4	4	4	4
1	4	2	2	4	2	2	4	4	4	4	4
1	4	4	4	4	4	2	4	4	4	2	4
1	4	4	4	4	4	4	4	4	4	2	4
1	4	3	3	5	4	4	4	4	4	3	4
1	4	3	4	4	4	4	3	4	4	3	4
1	4	4	1	5	2	1	2	5	5	4	1
1	4	2	3	3	4	4	4	4	4	4	4
1	4	2	4	4	4	4	4	4	4	4	3
1	4	2	4	4	4	2	4	4	2	4	4
1	4	2	2	2	4	4	4	4	4	4	4
1	4	2	4	4	2	4	4	4	2	4	4
1	4	4	4	4	4	3	4	4	4	4	4
1	4	3	3	3	4	3	4	4	4	4	4
1	4	3	4	3	4	3	3	4	4	3	4
1	4	4	4	2	4	4	4	4	4	4	4
1	4	4	4	4	4	4	4	4	4	2	4
1	4	4	3	4	4	4	4	4	4	2	4
1	4	2	3	3	3	4	4	4	4	4	4
1	4	3	2	4	5	3	4	5	5	4	4
1	4	2	3	3	2	2	2	3	3	3	3
1	4	4	3	3	4	2	3	4	4	3	4
1	4	2	2	4	4	2	3	4	2	3	3
1	4	4	3	4	4	4	4	4	2	3	4
1	4	2	4	4	4	2	4	4	4	4	5
1	4	4	3	4	4	4	2	4	4	2	2
1	4	3	4	4	4	3	4	4	4	3	4
1	4	2	2	4	2	2	4	2	4	4	2
1	4	4	4	2	4	4	4	4	4	4	4
1	4	3	4	4	4	4	4	4	4	4	4
1	4	4	3	2	4	3	4	4	4	4	4
1	4	3	2	2	4	4	4	2	4	4	4
1	4	4	4	4	4	2	2	4	4	4	4
1	4	2	3	4	2	2	2	4	3	2	4
1	4	4	2	4	3	4	4	4	4	4	4
1	4	3	3	3	2	4	4	5	3	4	1
1	4	2	2	1	1	1	5	1	4	3	4
1	4	3	5	4	3	2	5	5	5	3	5
1	4	2	4	3	2	2	2	3	2	3	4
1	4	4	4	3	4	2	3	4	2	3	4
1	4	4	4	4	4	4	4	4	4	2	4
1	4	3	2	4	3	3	5	4	3	4	3
1	4	3	3	4	4	5	3	5	5	3	5
1	4	2	5	1	1	4	4	1	5	5	5
1	4	4	4	2	2	4	2	2	2	4	4
1	4	3	4	3	4	2	4	2	4	1	4
1	4	2	3	3	4	4	4	4	3	3	4
1	4	2	4	3	4	4	4	4	4	3	4
1	4	2	4	4	4	2	2	5	4	3	4
1	4	3	2	2	4	2	4	4	4	4	3
1	4	3	3	3	4	3	3	4	4	3	2
1	4	4	3	2	2	4	4	4	2	2	2
1	4	3	4	4	4	4	3	2	4	2	4
1	4	3	4	4	2	2	5	4	4	4	4
1	4	2	2	2	2	2	4	2	2	4	4
1	4	2	4	2	4	4	4	3	4	4	4
1	4	3	4	5	4	4	4	2	3	4	5
1	4	4	4	4	5	5	4	5	4	4	4
1	4	4	4	3	3	2	3	3	2	3	4
1	4	3	2	3	5	5	5	5	5	4	5
1	4	4	4	4	4	4	4	5	5	4	5
1	4	4	4	4	4	2	4	4	4	2	2
1	4	4	4	4	4	4	4	4	4	4	4
1	4	4	4	4	4	4	2	4	4	2	4
1	4	4	4	4	4	4	2	4	4	4	2
1	4	2	2	2	4	4	2	4	4	4	4
1	4	2	2	2	4	4	2	4	4	2	4
1	4	2	2	3	4	2	2	2	4	2	2
1	4	4	4	4	4	4	4	4	4	4	4
1	4	3	2	4	4	4	4	4	4	2	4
1	4	2	4	2	2	2	2	4	4	4	4
1	4	4	4	4	4	3	2	4	4	4	4
1	4	4	2	4	1	4	2	3	4	4	4
1	4	4	2	2	2	2	2	2	2	1	1
1	4	3	2	2	4	4	2	4	2	2	4
1	4	2	4	4	4	4	4	4	4	4	4
1	4	2	4	2	2	2	2	2	2	4	4
1	4	4	2	3	4	3	2	4	2	3	4
1	4	2	3	3	4	4	2	4	4	2	4
1	4	2	3	3	4	4	3	4	4	4	4
1	4	4	2	2	4	2	2	2	4	4	4
1	4	2	2	4	2	4	4	4	4	3	4
1	4	2	4	2	4	2	4	4	4	1	5
1	4	2	2	3	4	4	4	2	2	2	4
1	4	2	3	1	4	3	2	5	5	2	5
1	4	2	4	2	4	4	4	4	4	2	4
1	4	4	4	3	2	4	4	4	4	3	4
1	4	4	2	4	4	2	4	4	4	4	4
1	4	4	2	4	5	2	4	4	4	4	4
1	4	2	3	3	4	3	3	2	3	3	4
1	4	2	4	2	2	4	4	4	4	2	5
1	4	3	4	4	3	4	2	4	4	2	4
1	4	5	3	4	4	3	3	4	4	2	5
1	4	2	4	4	2	2	4	4	4	4	4
1	4	3	3	5	3	2	4	5	5	2	3
1	4	4	2	4	4	4	4	4	4	2	4
1	4	4	2	4	4	4	4	4	4	4	4
1	4	4	4	4	4	4	4	4	4	4	4
1	4	4	4	4	4	4	4	4	4	4	4
1	4	4	4	4	4	4	4	4	4	4	4
1	4	4	2	4	2	4	4	4	4	2	4
1	4	2	3	2	2	2	4	4	3	4	4
1	4	2	4	4	4	3	4	4	4	4	4
1	4	3	3	3	2	4	2	4	4	4	4
1	4	2	2	4	2	2	2	2	4	2	4
1	4	2	2	4	2	2	2	4	4	2	4
1	4	4	4	4	4	4	4	2	4	3	2
1	4	4	4	2	2	4	4	4	4	2	4
1	4	2	2	4	4	4	4	4	4	2	2
1	4	4	2	4	4	4	2	3	4	2	2
1	4	3	2	4	2	4	4	4	4	2	4
1	4	3	3	1	4	2	4	2	4	2	4
1	4	4	2	4	4	4	4	4	4	4	4
1	4	5	3	4	5	5	4	4	5	4	4
1	4	2	2	2	2	2	2	1	4	4	4
1	4	3	2	3	3	3	2	1	4	3	4
1	4	4	3	3	1	3	3	3	3	5	1
1	4	4	5	1	5	2	5	5	5	2	1
1	4	4	4	4	4	4	4	4	4	4	4
1	4	4	4	2	4	4	4	4	4	4	5
1	4	2	4	4	5	4	4	4	5	4	5
1	4	3	4	4	4	5	4	4	4	4	4
1	4	4	2	4	4	4	3	4	4	2	4
1	4	3	3	2	2	3	3	4	4	3	4
1	4	3	3	3	4	4	4	3	2	3	3
1	4	2	4	3	3	4	2	4	3	3	3
1	4	4	2	4	4	4	4	4	4	2	4
1	4	4	5	2	4	1	5	5	4	4	5
1	4	3	4	5	4	4	5	5	4	1	4
1	4	2	4	4	5	4	5	5	4	4	4
1	4	2	2	3	4	4	4	4	4	3	1
1	4	4	2	4	4	4	4	2	2	4	4
1	4	4	4	4	4	4	2	4	4	2	3
1	4	2	3	2	3	3	2	3	4	3	4
1	4	4	4	2	2	4	2	2	2	2	2
1	4	3	4	3	4	4	4	4	4	4	4
1	4	2	2	2	4	2	4	4	4	4	4
1	4	4	2	4	4	4	4	4	4	4	4
1	4	2	4	3	4	4	4	3	4	3	4
1	4	2	4	2	4	2	4	4	4	4	4
1	4	4	2	4	4	4	4	4	4	2	4
1	4	5	2	5	5	4	4	5	5	4	4
1	4	2	1	4	4	4	4	4	4	2	4
1	4	3	2	2	2	3	4	4	2	2	2
1	4	2	2	2	2	1	3	2	2	2	4
1	4	2	4	2	4	4	4	4	4	4	4
1	4	2	4	4	4	4	4	2	2	2	4
1	4	3	4	3	3	2	3	3	2	4	4
1	4	4	4	4	4	3	2	4	2	4	4
1	4	3	4	4	4	2	2	4	4	2	3
1	4	4	4	2	2	2	2	2	4	2	4
1	4	2	4	4	4	3	4	4	4	2	4
1	4	3	4	2	4	4	4	2	3	4	4
1	4	2	3	4	4	2	4	4	4	4	4
1	4	2	3	3	2	2	3	2	2	3	4
1	4	2	3	4	4	4	4	4	4	3	4
1	4	3	4	4	4	4	4	4	4	3	2
1	4	2	2	2	3	3	2	3	4	3	4
1	4	2	2	2	2	2	4	2	3	3	3
1	4	3	3	3	4	3	4			4	3
1	4	2	4	2	4	4	2	4	4	4	4
1	4	2	3	4	4	4	2	4	4	4	4
1	4	3	3	4	4	2	4	4	4	2	4
1	4	4	4	2	4	4	2	4	3	4	4
1	4	4	4	2	4	3	2	4	2	4	4
1	4	2	3	2	2	4	2	2	4	4	4
1	4	4	2	4	4	2	3	4	4	4	2
1	4	4	3	4	4	4	4	4	4	4	4
1	4	4	4	4	4	4	4	4	4	4	4
1	4	5	2	2	4	2	4	2	2	4	2
1	4	3	3	4	5	2	4	5	5	3	4
1	4	2	4	5	4	4	5	5	4	4	4
1	4	2	2	4	4	2	2	4	4	2	4
1	4	1	3	3	4	4	4	3	1	2	5
1	4	4	3	4	4	4	4	4	4	2	4
1	4	4	4	4	4	2	4	4	4	4	5
1	4	4	3	2	4	4	4	4	4	4	2
1	4	2	4	4	4	4	4	2	4	3	4
1	4	3	4	4	3	4	3	4	4	3	4
1	4	4	3	2	4	4	4	4	4	4	4
1	4	2	4	2	4	3	2	4	4	2	4
1	4	4	4	4	4	4	4	4	5	4	4
1	4	4	4	4	4	4	4	2	4	2	2
1	4	3	3	4	4	2	3	3	2	3	4
1	4	4	4	2	2	3	2	2	2	3	4
1	4	4	3	4	2	3	4	1	4	3	2
1	4	2	4	4	2	2	2	4	4	4	4
1	4	3	4	2	4	4	2	4	4	2	4
1	4	2	4	2	4	4	2	4	4	2	4
1	4	4	4	4	4	2	4	4	4	4	4
1	4	4	2	4	2	4	2	2	4	2	4
1	4	2	4	4	4	4	4	4	4	2	4
1	4	4	4	4	4	4	4	4	4	2	4
1	4	2	2	2	4	2	2	4	4	2	4
1	4	2	4	4	3	4	4	4	4	2	4
1	4	2	1	2	4	2	5	5	4	2	4
1	4	2	2	2	4	2	2	2	4	4	4
1	4	2	2	4	2	2	2	2	1	4	5
1	4	2	1	5	2	2	2	2	5	4	4
1	4	4	2	4	4	2	2	4	4	4	4
1	4	4	2	2	4	4	2	2	4	2	2
1	4	2	4	4	4	4	4	4	4	4	4
1	4	4	2	4	2	4	4	4	4	2	4
1	4	3	2	4	4	4	4	4	4	4	4
1	4	1	1	3	3	4	3	2	3	1	4
1	4	2	2	2	4	2	4	4	4	2	4
1	4	1	2	1	1	1	4	2	4	4	4
1	4	2	1	2	2	4	5	5	5	2	4
1	4	4	4	4	2	4	2	4	4	2	2
1	4	4	1	1	1	2	2	5	4	1	2
1	4	4	3	4	4	3	2	1	4	2	2
1	4	2	2	2	2	2	2	2	4	4	4
1	4	2	4	2	2	2	2	2	2	4	4
1	4	2	4	2	2	2	2	2	2	4	4
1	4	4	4	4	4	4	4	4	4	4	4
1	4	2	4	2	2	2	2	2	4	2	2
1	4	4	4	5	5	4	4	5	5	3	5
1	4	2	2	4	4	2	4	4	4	4	4
1	4	2	4	4	2	4	2	4	4	4	4
1	4	2	2	4	2	2	2	4	4	4	4
1	4	4	2	4	2	2	4	4	4	2	4
1	4	2	4	2	2	2	4	4	4	4	4
1	4	2	2	2	2	2	4	4	3	4	4
1	4	2	2	4	4	2	4	4	4	4	4
1	4	1	1	1	4		4	1	5	2	4
1	4	1		3	3	4	4	2	5	2	4
1	4	1	1	2	2	4	4	1	4	3	3
1	4	3	3	4	2	3	3	3	2	3	4
1	4	2	4	4	2	4	4	4	4	4	4
1	4	2	2	4	2	2	2	2	2	4	4
1	4	4	2	2	4	2	2	4	4	2	4
1	4	4	2	2	4	4	2	4	4	4	4
1	4	4	2	4	4	4	1	4	2	2	4
1	4	2	4	4	4	2	4	4	4	4	4
1	4	2	4	4	4	4	4	4	4	4	4
1	4	4	4	4	4	4	4	4	4	4	4
1	4	4	4	4	4	4	3	4	4	4	4
1	4	4	4	2	4	4	4	4	4	2	4
1	4	2	4	4	4	4	2	4	4	4	4
1	4	2	2	4	4	4	4	4	4	2	4
1	4	3	3	4	4	2	2	4	2	2	2
1	4	4	2	4	4	2	2	4	4	2	4
1	4	2	3	2	4	2	2	4	4	2	2
1	4	2	2	2	2	4	2	4	4	4	4
1	4	2	4	2	4	4	4	4	4	4	4
1	4	2	4	4	4	4	4	4	2	4	4
1	4	2	4	4	5	4	4	4	4	4	4
1	4	4	2	2	2	2	2	4	4	4	4
1	4	4	2	4	4	3	3	4	4	3	4
1	4	2	4	2	4	2	4	4	3	2	3
1	4	4	2	3	3	3	4	2	3	2	2
1	4	2	4	3	4	3	2	4	2	2	4
1	4	2	4	4	2	2	4	4	4	4	4
1	4	2	4	2	3	2	2	2	3	4	4
1	4	2	4	4	4	2	4	4	4	3	4
1	4	3	4	4	4	4	4	4	4	4	4
1	4	4	4	4	4	4	3	4	4	3	4
1	4	3	4	4	2	2	4	4	4	4	4
1	4	2	4	2	4	4	4	2	2	4	2
1	4	4	2	4	4	2	4	4	4	4	4
1	4	3	3	2	4	3	4	4	4	3	4
1	4	3	3	3	2	3	2	2	4	3	4
1	4	4	3	4	4	3	4	3	4	4	4
1	4	4	2	2	4	2	2	4	2	4	2
1	4	2	5	3	4	5	4	4	4	2	4
1	4	5	4	4	4	1	2	5	4	2	3
1	4	4		3	3	3	3	3	2	3	4
1	4	1	2	3	4	4	5	3	4	2	5
1	4	1	1	3	3	5	5	3	2	2	5
1	4	3	4	2	4	4	4	4	4	2	1
1	4	2	4	4	4	4	4	4	4	4	2
1	4	2	3	4	4	4	4	4	4	4	4
1	4	4	2	4	4	2	4	4	4	2	4
1	4	4	4	4	4	2	2	4	4	2	4
1	4	4	4	4	4	4	4	4	4	4	4
1	4	2	3	4	4	2	4	4	4	3	4
1	4	2	5	1	4	3	3	4	4	2	2
1	4	4	4	4	4	2	2	3	4	4	2
1	4	4	2	4	4	4	4	4	4	3	4
1	4	2	2	2	4	2	2	2	4	4	4
1	4	4	2	2	4	4	2	4	4	4	4
1	4	4	4	4	4	2	4	4	4	4	4
1	4	2	4	3	4	2	4	4	4	3	4
1	4	3		2	3	3	3	5	2	4	4
1	4	3	3	3	5	5	3	3	4	3	2
1	4	4	2	4	3	4	3	4	4	3	3
1	4	4	4	4	4	4	4	4	4	4	4
1	4	2	4	4	2	4	4	4	4	4	4
1	4	5	1	3	3	3	2	2	2	4	4
1	4	3	2	4	4	5	4	4	5	5	4
1	4	4	4	4	4	4	5	5	4	4	5
1	4	4	2	4	4	4	4	2	2	2	4
1	4	3	4	4	4	4	4	4	4	4	4
1	4	4	4	4	4	4	4	4	4	3	4
1	4	2	4	4	2	2	2	4	4	4	4
1	4	2	2	4	4	2	2	3	2	2	4
1	4	2	4	2	4	4	4	4	3	4	4
1	4	3	4	3	4	4	4	4	4	4	2
1	4	4	4	2	4	4	4	4	4	4	2
1	4	3	2	2	4	4	4	4	4	4	4
1	4	2	2	2	1	1	4	1	4	1	4
1	4	2	4	4	4	2	2	4	4	4	4
1	4	4	2	4	4	5	4	5	5	2	4
1	4	5	2	1	4	2	4	5	4	5	5
1	4	2	2	2	3	2	2	1	4	2	4
1	4	2	2	4	2	4	2	4	4	4	4
1	4	4	3	4	2	2	4	3	2	5	4
1	4	4	2	2	4	4	4	4	4	3	4
1	4	4	3	3	4	3	4	2	4	4	3
1	4	2	4	4	4	2	2	4	4	2	4
1	4	3	4	3	4	4	2	4	2	3	4
1	4	4	4	4	2	2	4	4	4	4	4
1	4	2	3	4	4	4	4	4	4	4	4
1	4	2	1	4	4	2	4	5	5	5	5
1	4	2	4	1	2	1	2	4	3	4	5
1	4	5	4	5	4	4	4	5	5	4	5
1	4	4	4	2	2	2	2	1	2	2	4
1	4	2	4	4	4	4	4	4	4	4	4
1	4	4	4	4	4	4	4	4	4	3	4
1	4	2	4	3	3	4	3	4	4	4	4
1	4	3	4	4	4	4	3	4	4	4	4
1	4	3	2	4	4	4	4	4	4	2	4
1	4	4	4	2	5	5	4	5	5	2	4
1	4	2	1	2	2	4	4	4	4	2	4
1	4	4	4	4	4	4	4	4	4	4	4
1	4	3	3	2	2	4	4	2	3	4	4
1	4	3	3	4	4	3	4	4	4	4	4
1	4	3	4	2	2	2	4	4	4	4	4
1	4	4	4	2	4	2	2	4	4	4	4
1	4	2	4	4	2	4	4	4	4	4	4
1	4	3	4	4	4	4	4	4	4	4	4
1	4	4	4	4	2	4	4	5	5	4	4
1	4	4	4	4	2	2	4	4	4	4	4
1	4	4	4	2	4	4	4	4	4	4	4
1	4	2	4	4	4	3	4	2	2	4	2
1	4	2	3	4	4	3	2	2	2	4	4
1	4	2	4	3	4	4	4	4	4	4	4
1	4	2	2	2	2	2	2	2	3	4	4
1	4	2	4	2	3	2	2	2	4	2	4
1	4	4	4	5	2	1	5	2	3	2	1
1	4	5	1	2	2	5	2	3	3	3	1
1	4	2	4	4	5	4	4	4	4	2	4
1	4	4	4	4	2	3	4	4	3	4	4
1	4	2	2	2	2	4	4	4	4	2	4
1	4	2	2	2	2	2	4	2	4	2	4
1	4	2	2	4	4	2	2	2	2	4	4
1	4	2	4	4	2	2	2	4	2	4	2
1	4	2	2	3	3	3	3	2	3	3	3
1	4	2	2	3	4	4	2	4	4	4	4
1	4	3	4	2	2	2	4	4	2	4	4
1	4	4	2	2	4	4	2	4	4	4	3
1	4	2	4	2	3	4	4	3	3	4	4
1	4	4	3	4	4	4	3	5	3	3	4
1	4	4	1	5	4	2	2	2	2	1	2
1	4	4	4	4	1	2	2	4	4	2	1
1	4	4	4	4	4	2	3	2	4	3	4
1	4	4	1	2	4	1	4	4	5	2	4
1	4	2	4	2	2	2	2	2	2	4	4
1	4	3	2	2	2	2	2	3	2	2	4
1	4	4	3	4	2	3	2	2	2	3	3
1	4	4	4	2	2	4	2	2	4	2	4
1	4	2	4	2	2	2	2	2	2	4	3
1	4	4	2	2	2	4	4	2	4	4	4
1	4	2	4	4	4	3	2	4	4	4	4
1	4	3	3	4	4	4	4	3	4	4	4
1	4	1	4	4	4	2	2	4	4	2	4
1	4	4	4	4	2	2	2	2	4	4	2
1	4	4	3	1	5	4	4	1	1	5	2
1	4	4	2	2	4	2	4	4	4	3	4
1	4	3	5	3	5	2	4	2	2	2	5
1	4	4	4	4	4	2	4	4	5	4	4
1	4	4	2	4	4	4	2	4	2	2	4
1	4	3	2	5	4	3	4	4	3	4	4
1	4	2	2	4	4	4	4	4	4	5	5
1	4	2	2	4	4	4	4	4	4	4	4
1	4	2	4	4	4	2	4	4	4	4	4
1	4	4	2	4	2	4	2	4	2	4	4
1	4	2	3	3	2	4	4	4	4	4	4
1	4	2	4	3	4	4	4	4	4	4	4
1	4	2	2	2	4	4	4	4	4	4	4
1	4	2	2	2	4	3	4	2	4	2	4
1	4	4	3	2	2	4	2	4	4	4	2
1	4	1	2	1	1	2	4	2	4	1	4
1	4	2	4	2	2	2	1	2	5	4	4
1	4	4	4	2	4	3	3	3	4	4	4
1	4	2	4	4	2	2	4	4	2	4	4
1	4	2	2	4	2	2	4	4	2	4	4
1	4	4	2	4	4	4	4	4	3	3	4
1	4	3	1	4	4	4	2	1	5	2	5
1	4	4	4	2	4	4	4	4	4	4	4
1	4	4	5	5	4	3	3	5	5	4	4
1	4	2	3	4	2	3	4	4	4	4	4
1	4	2	4	4	2	3	2	2	2	2	4
1	4	4	3	3	3	2	4	3	3	3	4
1	4	4	4	4	4	4	3	4	4	4	4
1	4		3	4	4	3	2	4	4	3	4
1	4	4	4	4	4	4	4	4	4	2	4
1	4	2	3	3	4	4	4	5	4	4	5
1	4	2	3	4	4	4	4	4	3	4	4
1	4	4	3	2	4	4	4	4	4	4	4
1	4	2	4	4	4	4	4	4	4	4	4
1	4	2	4	4	4	2	4	3	4	4	4
1	4	2	2	2	4	4	4	4	2	4	2
1	4	3	4	2	4	4	4	4	4	2	2
1	4	2	4	5	4	4	5	5	5	3	5
1	4	4	4	4	5	5	4	4	4	3	4
1	4	5	5	5	5	2	4	5	4	4	4
1	4	2	4	2	4	4	4	2	4	4	4
1	4	2	2	4	2	2	4	4	4	2	4
1	4	4	4	2	4	4	4		4	4	4
1	4	3	4	4	4	4	4	2	4	4	4
1	4	2	3	4	4	4	4	4	4	4	4
1	4	4	4	4	4	4	4	4	4	3	4
1	4	2	4	2	4	4	2	4	4	4	4
1	4	2	4	4	2	5	5	5	4	4	4
1	4	2	2	4	2	4	4	4	4	3	4
1	4	4	4	2	2	2	4	4	4	4	4
1	4	2	4	4	4	4	4	4	4	4	4
1	4	4	4	4	4	2	4	4	5	4	4
1	4	4	2	4	2	2	4	4	4	4	2
1	4	2	4	4	4	4	4	4	4	4	2
1	4	4	2	4	4	4	4	4	4	4	4
1	4	4	4	4	4	4	4	4	4	4	4
1	4	3	4	4	4	4	2	4	4	4	4
1	4	3	4	3	4	2	2	2	4	2	4
1	4	3	3	4	3	3	4	3	3	3	4
1	4	3	4	3	4	4	4	4	4	3	3
1	4	4	2	4	2	4	2	4	4	4	4
1	4	3	4	4	4	4	4	4	4	4	4
1	4	3	2	2	2	3	2	2	2	4	4
1	4	4	4	4	4	4	4	4	4	4	4
1	4	4	3	2	3	2	4	4	4	3	4
1	4	2	2	4	4	4	4	4	4	4	2
2	4	4	4	2	2	2	2	4	4	2	2
2	4	2	4	2	2	2	3	2	1	2	2
2	4	2	2	4	1	4	1	2	1	5	2
2	4	2	3	1	4	5	2	1	5	3	4
2	4	3	5	1	1	4	2	1	4	5	5
2	4	2	4	2	2	2	4	4	4	4	4
2	4	2	1	2	2	3	4	2	4	4	2
2	4	2	2	2	2	3	3	4	4	3	4
2	4	2	2	2	5	4	4	5	4	2	5
2	4	2	3	4		5	4	5	4	4	5
2	4	4	4	4	4	4	4	4	4	5	4
2	4	4	2	3	3	4	3	4	3	3	4
2	4	3	2	4	4	3	4	4	4	4	4
2	4	3	3	3	2	3	4	2	4	4	4
2	4	4	4	5	4	4	3	5	4	4	5
2	4	4	4	2	2	4	4	4	2	4	4
2	4	2	2	4	4	4	4	4	4	4	4
2	4	4	4	4	4	4	4	4	4	4	4
2	4	2	4	2	4	4	4	4	4	4	4
2	4	2	4	2	4	4	4	4	4	4	4
2	4	3	4	2	4	3	5	4	4	4	5
2	4	4	4	4	4		4	4	4	4	4
2	4	4	2	4	4	3	4	4	4	4	4
2	4	4	2	4	4	4	4	4	4	4	4
2	4	4	2	4	4	4	3	4	4	4	4
2	4	3	2	4	3	4	2	3	3	3	4
2	4	4	3	3	3	2	2	2	2	3	2
2	4	2	2	2	2	2	2	2	3	2	2
2	4	4		2	2	2	2	3	3	2	2
2	4	2	4	4	4	4	4	4	4	4	4
2	4	2	4	4	4	4	4	4	4	4	2
2	4	2	4	2	2	4	2	4	4	4	4
2	4	2	4	2	2	4	4	4	4	4	4
2	4	2	3	4	4	4	4	4	4	4	4
2	4	4	2	4	2	4	4	4	4	3	4
2	4	4	2	3	2	2	4	4	4	4	2
2	4	2	4	2	2	2	2	4	4	4	4
2	4	3	2	4	4	4	5	5	4	4	4
2	4	4	2	2	4	4	2	2	5	4	4
2	4	2	4	2	2	2	4	2	4	4	4
2	4	1	1	2	3	2	2	1	4	1	1
2	4	1	2	4	2	3	4	3	4	2	3
2	4	2	4	3	4		4	2	4	3	4
2	4	4	1	4	2	2	1	2	3	3	3
2	4	4	1	2	2	3	2	2	3	3	3
2	4	4	3	2	3	2	2	3	2	3	4
2	4	4	3	2	2	3	2	3	2	3	4
2	4	2	4	4	3	4	2	4	4	3	4
2	4	4	4	4	4	4	4	3	4	3	3
2	4	1	2	5	1	1	1	3	5	1	5
2	4	4	2	4	2	4	4	5	4	2	4
2	4	2	2	4	4	3	4	5	5	2	4
2	4	2	4	4	2	2	4	2	4	4	2
2	4	4	4	4	2	4	4	4	4	4	2
2	4	2	4	2	2	4	4	4	4	4	4
2	4	2	4	2	2	3	2	4	4	4	4
2	4	3	3	3	2	5	1	5	5	4	4
2	4	4	4	3	2	4	2	2	2	3	4
2	4	2	4	2	4	3	2	3	3	3	4
2	4	4	3	3	2	3	2	3	3	3	2
2	4	2	2	2	2		2	2		4	4
2	4	2	4	3	2	3	4	4	3	3	4
2	4	1	3	2	4	4	4	2	4	2	2
2	4	1	1	2	4		4	3	5	1	3
2	4	2	2	2	4		3	3	2	1	3
2	4	2	2	4	4	4	4	4	3	4	4
2	4	4	2	4	4	4	4	4	4	4	4
2	4	3	2	4	4	4	4	4	4	4	4
2	4	2	2	4	4	4	4	4	4	2	2
2	4	3	3	4	3	4	4	3	4	3	3
2	4	4	4	4	4	2	2	2	4	4	4
2	4	4	2	4	4	2	1	4	4	2	4
2	4	4	4	2	2	4	3	2	5	3	4
2	4	4	4	4	5	4	4	5	2	4	4
2	4	3	3	3	4	3	3	3	3	3	4
2	4	4	4	5	2	2	4	5	4	5	5
2	4	2	2	2	4	4	4	2	5	4	5
2	4	2	2	4	4	4	4	2	5	2	2
2	4	3	3	3	4	2	2	2	2	3	4
2	4	3	3	3	2	2	2	3	2	3	4
2	4	4	4	3	3	2	2	3	2	3	4
2	4	2	2	2	3	4	4	3	3	1	4
2	4	2	2	4	2	2	3	2	4	4	4
2	4	2	2	4	4	4	4	4	4	4	3
2	4	3	3	4	2	2	3	4	3	4	2
2	4	3	3	3	2	2	4	4	4	4	4
2	4	2	4	4	2	2	2	2	4	4	4
2	4	2	4	2	2	2	2	2	4	4	2
2	4	4	4	2	2	2	2	2	3	3	3
2	4	2	5	2	1	4	1	1	4	2	2
2	4	2	3	4	4	3	3	3	4	3	1
2	4	4	2	4	2	4	4	2	4	2	4
2	4	2	2	2	2	4	4	4	4	4	2
2	4	4	2	4	3	2	2	4	4	3	4
2	4	2	2	2	2	4	2	2	4	4	4
2	4	2	2	4	2	2	2	4	4	4	4
2	4	2	4	2	2	4	2	4	4	2	4
2	4	4	2	4	5	4	4	5	5	4	1
2	4	4	4	2	2	2	4	4	4	2	4
2	4	4	2	2	4	4	3	4	4	4	2
2	4	2	4	2	4	4	4	2	4	2	2
2	4	2	4	2	2	4	2	2	2	4	3
2	4	2	3	4	4	2	4	4	4	4	4
2	4	4	4	4	3	2	4	4	5	4	4
2	4	4	3	4	4	5	4	5	4	4	5
2	4	2		4	4	2	5	5	5	5	2
2	4	2	1	1	2	2	1	2	4	3	4
2	4	2	3	4	2	4	2	3	4	1	2
2	4	2	4	4	2	2	2	4	4	2	4
2	4	2	4	3	2	2	2	4	4	4	2
2	4	2	4	2	2	4	2	4	4	2	2
2	4	4	4	4	2	2	3	2	3	3	3
2	4	4	3	3	2	4	2	3	3	3	3
2	4	4	3	2	2	3	2	3	3	3	3
2	4	4	3	2	2	2	2	3	3	3	3
2	4	4	2	4	2	4	4	4	2	4	2
2	4	4	4	4	4	4	3	4	4	4	4
2	4	4	2	4	2	4	4	4	3	4	2
2	4	3	2	4	2	4	4	4	4	4	2
2	4	2	3	2	2	4	4	4	4	4	2
2	4	3	2	4	2	4	4	4	4	2	2
2	4	2	4	2	4	4	4	4	4	4	4
2	4	2	2	4	4	4	4	4	4		4
2	4	2	4	2	4	3	2	3	4	2	4
2	4	4	1	4	4	4	5	5	5	3	4
2	4	4	2	5	5	5	4	5	5	4	5
2	4	2	2	2	4	4	4	5	5	4	4
2	4	1	4	1	4	3	2	2	3	1	2
2	4	2	2	2	2	4	2	2	4	2	2
2	4	3	4	4	3	4	3	4	3	3	4
2	4	4	3	3	2	3	3	4	3	3	3
2	4	4	3	4	3	4	4	4	4	5	4
2	4	3	2	4	4	4	3	4	4	4	5
2	4	2	2	4	3	4	4	4	4	4	2
2	4	4	2	4	2	4	4	4	4	4	2
2	4	2	2	4	2	2	4	2	4	4	2
2	4	2	2	3	4	2	2	4	4	4	2
2	4	3	2	4	3	4	3	4	4	2	4
2	4	2	4	2	2	2	2	3	3	2	4
2	4	2	4	2	2	2	4	2	4	3	4
2	4	2	4	4	2	4	4	2	4	4	4
2	4	2	2	2	4	4	2	2	4	4	4
2	4	4	4	4	4	4	4	4	4	4	2
2	4	2	2	3	4	3	4	2	3	2	4
2	4		2	3	4	3	2	4	3	2	4
2	4	4	3	3	3	3	3	3	3	4	3
2	4	3	3	3	2	3	3	4	3	3	4
2	4	3	4	4	2	2	2	4	4	4	4
2	4	2	4	3	4	4	4	4	4	4	2
2	4	2	2	4	4	4	4	4	4	4	2
2	4	2	2	4	2	4	4	4	4	4	4
2	4	3	2	4	4	2	4	4	4	4	2
2	4	4	2	4	3	4	4	4	4	4	4
2	4	4	2	4	4	4	4	4	4	4	4
2	4	2	2	4	4	4	4	4	4	4	4
2	4	3	4	2	3	4	2	4	4	4	3
2	4	2	4	2	2	2	2	2	2	2	4
2	4	5	5	5	4	4	4	5	5	5	5
2	4	4	5	5	5	4	5	5	4	5	5
2	4	4	2	4	4	3	2	2	3	4	4
2	4	3	2	2	4	4	2	2	3	3	4
2	4	4	4	3	4	1	3	2	3	3	3
2	4	2	3	2	4	4	2	3	4	4	2
2	4	4	4	4	4	2	2	4	4	3	2
2	4	4	4	4	4	4	4	4	4	2	4
2	4	2	4	2	4	4	4	4	4	3	4
2	4	4	4	4	4	4	5	3	5	3	4
2	4	4	2	4	2	3	4	4	4	4	4
2	4	4	3	4	4	4		4	4	3	4
2	4	4	4	4	2	3	4	2	4	3	2
2	4	3	2	2	2	4	2	2	4	2	2
2	4	2	2	2	2	4	4	4	4	2	2
2	4	4	3	3	2	3	2	3	3	3	2
2	4	4	3	3	2	3	2	3	2	3	3
2	4	4	3	3	3	3	2	2	4	2	2
2	4	4	4	2	2	4	2	2	3	4	1
2	4	2	2	2	4	4	3	2	3	4	4
2	4	2	4	2	2	3	3	2	4	4	2
2	4	2	3	2	2	4	2	4	4	4	4
2	4	2	4	2	2	2	2	2	4	4	4
2	4	4	2	4	2	4	2	2	4	4	2
2	4	3	2	4	4	4	3	4	4	4	4
2	4	4	2	4	3	4	3	4	4	4	2
2	4	4	2	4	4	4	4	4	4	4	4
2	4	4	2	4	4	4	3	4	4	4	4
2	4	4	2	4	4	4	4	4	4	4	2
2	4	2	4	2	2	2	4	4	4	2	3
2	4	4	2	4	4	4	4	4	4	4	4
2	4	2	2	2	4	4	2	4	4	2	2
2	4	2	4	4	3	4	4	2	4	4	4
2	4	4	3	4	4	4	4	4	4	4	4
2	4	4	2	4	4	4	4	4	4	4	2
2	4	2	1	2	2	4	2	3	4	1	2
2	4	1	2	2	2		1	2	4	1	2
2	4	3	3	3	3	3	3	3	3	1	1
2	4	2	2	4	2	2	2	2	4	4	2
2	4	2	2	2	2	4	2	2	4	2	2
2	4	2	2	2	3	4	2	2	4	2	4
2	4	2	2	2	2	4	2	4	4	2	3
2	4	3	2	4	4	4	3	3	4	4	4
2	4	4	2	4	4	2	3	4	4	4	4
2	4	4	2	4	4	4	4	4	4	4	4
2	4	2	4	2	2	2	2	4	4	2	2
2	4	2	2	2	2	4	2	2	4	2	2
2	4	2	4	2	2	2	2	4	4	4	4
2	4	2	4	2	2	4	2	4	2	4	2
2	4	2	4	2	2	2	2	4	4	4	2
2	4	2	4	2	2	2	3	3	4	4	2
2	4	3	4	3	4	4	2	3	4	3	4
2	4	2	2	4	2	4	2	2	4	4	4
2	4	2	2	4	3	4	2	2	4	4	2
2	4	2	2	2	2	2	2	4	2	4	3
2	4	2	2	2	2	4	2	2	4	4	4
2	4	3	4	2	1	5	1	4	5	3	2
2	4	4	3	3	2	3	2	2	3	3	3
2	4	4	3	2	3	3	2	2	3	3	4
2	4	2	2	2	4	4	4	4	3	2	2
2	4	4	2	3	4	4	2	2	3	2	2
2	4	2	2	2	4	3	4	2	4	2	2
2	4	4	3	3	2	4	5	3	5	4	2
2	4	4	4	4	4	4	5	4	4	4	4
2	4	2	4	3	4	4	4	3	4	4	2
2	4	3	4	3	2	4	3	3	3	3	3
2	4	4	3	4	3	4	2	3	4	3	4
2	4	2	2	4	3	4	4	2	4	4	4
2	4	4	3	4	4	4	4	4	4	4	4
2	4	4	2	3	4	4	4	4	4	4	4
2	4	3	4	3	2	2	2	3	4	4	2
2	4	2	4	2	2	2	2	2	3	4	2
2	4	4	3	3	2	3	2	3	2	3	4
2	4	4	1	3	2	3	2	2	2	3	2
2	4	1	1	4	2	3	2	3	3	2	2
2	4	3	3	2	2	1	1	5	1	5	3
2	4	2	4	3	2	4	2	4	4	2	2
2	4	2	2	2	2	4	2	2	2	3	4
2	4	2	2	4	2	4	2	2	4	3	4
2	4	2	2	3	4	4	4	2	4	4	4
2	4	4	2	4	4	4	4	4	4	4	4
2	4	4	2	4	4	4	4	4	4	4	4
2	4	3	4	4	2	2	4	4	4	4	2
2	4	2	2	4	2	4	2	4	4	4	4
2	4	2	4	4	2	2	4	4	4	4	4
2	4	4	3	4	4	4	4	4	4	3	4
2	4	4	2	4	2	4	5	4	5	4	4
2	4	4	2	4	4	4	4	4	4	4	4
2	4	4	4	4	4	4	4	3	4	4	4
2	4	1	2	2	4	4	4	2	4	2	2
2	4	2	2	3	4	4	4	2	4	2	2
2	4	1	2	2	4	4	4	3	3	2	3
2	4	4	4	3	2	4	2	2	2	3	4
2	4	4	3	3	4	4	2	3	2	3	2
2	4	4	4	3	4	3	4	3	3	3	3
2	4	4	4	3	3	4	2	2	2	3	3
2	4	4	4	3	4	4	4	3	2	3	4
2	4	4	2	3	2	4	4	4	4	4	4
2	4	2	3	3	3	4	2	2	4	2	4
2	4	2	2	4	4	4	2	3	3	4	2
2	4	4	2	2	2	3	2	2	3	3	3
2	4	4	3	2	2	4	4	4	4	4	2
2	4	4	4	4	4	4	4	4	3	4	2
2	4	3	4	3	3	3	2	4	4	3	2
2	4	4	4	2	3	2	4	2	4	3	4
2	4	4	2	4	4	4	4	4	4	4	4
2	4	4	2	4	4	4	4	4	4	4	4
2	4	4	2	4	4	4	4	4	4	4	4
2	4	4	2	4	2	4	4	4	4	4	4
2	4	4	2	2	2	4	2	4	4	4	4
2	4	4	2	4	2	4	4	4		2	4
2	4	3	4	3	4	2	2	2	3	3	4
2	4	4	2	3	3	2	4	2	2	3	4
2	4	3	3	3	3	3	4	4	4	3	4
2	4	3	4	4	4	3	2	2	2	3	4
2	4	2	4	4	2	4	2	3	4	3	5
2	4	3	2	2	2	2	2	2	4	5	2
2	4	2	2	4	4	2	2	2	3	4	4
2	4	2	2	4	2	4	4	2	4	4	2
2	4	2	2	2	4	2	2	4	4	4	2
2	4	2	4	4	3	4	4	4	4	4	2
2	4	4	3	4	2	4	3	4	4	4	4
2	4	4	2	4	4	4	4	4	4	4	4
2	4	2	3	4	4	4	4	4	4	4	4
2	4	2	2	4	4	4	4	4	4	2	4
2	4	4	2	4	4	4	4	4	4	4	4
2	4	2	2	4	4	4	2	4	4	4	4
2	4	2	4	4	2	2	2	2	4	4	2
2	4	2	2	2	2	2	2	4	4	4	2
2	4	2	2	4	4	4	2	2	4	4	2
2	4	4	3	4	4	4	4	5	5	4	2
2	4	4	4	4	4	3	2	3	2	3	4
2	4	4	4	3	4	3	2	3	1	3	4
2	4	4	4	3	4	2	2	2	1	4	4
2	4	3	3	3	1	3	2	5	4	4	4
2	4	3	2	4	3	3	2	4	4	2	3
2	4	2	2	3	3	4	2	4	4	2	4
2	4	3	4	4	3	4	2	2	3	2	4
2	4	4	2	4	3	2	2	2	4	1	4
2	4	4	3	4	3	3	2	3	3	4	3
2	4	2	4	2	4	4	2	5	5	3	5
2	4	2	2	2	2	2	4	4	4	4	4
2	4	5	5	3	5	1	5	5	2	5	5
2	4	4	4	3	4	4	4	4	2	4	5
2	4	4	3	3	4	3	4	3	3	3	5
2	4	4	4	4	4	4	5	5	5	5	5
2	4	2	4	4	4	4	3	4	4	4	4
2	4	3	4	2	4	4	3	4	4	4	4
2	4	4	3	3	4	2	4	4	2	2	4
2	4	2	3	3	4	3	2	2	4	4	2
2	4	2	2	4	2	2	4	4	4	2	4
2	4	4	4	4	4	4	2	5	4	5	4
2	4	4	3	4	4	4	4	4	3	4	4
2	4	4	2	4	4	4	3	4	4	2	4
2	4	2	2	3	4	4	4	4	4	4	4
2	4	4	3	4	4	4	3	4	4	4	4
2	4	4	2	4	2	4	4	3	4	4	4
2	4	3	5	3	5	5	5	5	5	3	5
2	4	2	3	4	4	4	3	4	5	3	3
2	4	4	4	4	2	4	3	4	4	4	4
2	4	4	4	2	4	4	4	4	4	4	4
2	4	2	3	4	4	4	3	4	4	3	4
2	4	4	2	4	4	4	4	4	4	4	4
2	4	2	2	4	4	4	4	4	4	4	2
2	4	3	4	2	2	4	4	4	4	4	2
2	4	3	3	5	5	4	4	5	5	5	4
2	4	3	5	5	5	4	4	5	5	5	5
2	4	4	4	4	2	3	2	5	3	5	4
2	4	4	2	4	5	5	2	5	5	1	5
2	4	4	2	4	4	2	5	4	4	5	4
2	4	2	4	2	2	2	4	4	4	4	4
2	4	2	3	4	4	4	4	4	4	3	4
2	4	4	4	4	4	4	4	4	4	4	4
2	4	4	4	4	4	4	4	4	4	4	4
2	4	4	4	2	4	4	3	4	4	4	4
2	4	3	4	4	4	4	4	4	4	4	4
2	4	4	4	4	3	4	4	4	4	4	4
2	4	2	2	4	4	4	4	4	4	4	4
2	4	2	2	4	4	4	2	4	4	4	4
2	4	4	4	4	2	4	2	2	3	4	4
2	4	4	5	5	5	3	4	5	5	4	5
2	4	2	3	4	4	5	3	5	4	3	4
2	4	3	4	4	4	2	3	3	5	4	5
2	4	2	4	4	2	2	4	4	4	4	4
2	4	4	4	2	4	4	4	4	4	4	4
2	4	4	4	2	4	4	2	4	4	4
2	4	2	4	2	4	2	2	4	4	4	4
2	4	2	4	2	4	4	4	4	4	4	4
2	4	4	4	4	4	4	4	4	4	4	4
2	4	4	2	1	5	1	5	1	5	5	4
2	4	1	3	1	2		3	2	3	3	4
2	4	4	5	5	5	4	5	5	5	5	5
2	4	4	5	5	5	4	5	5	5	3	5
2	4	3	2	5	5	4	3	5	5	4	5
2	4	2	4	3	4	4	5	3	4	4	5
2	4	3	2	4	4	2	2	4	4	4	4
2	4	1	3	1	4		4	2	4	2	4
2	4	1	2	2	4		4	3	4	2	4
2	4	1	2	2	4		4	3	2	2	4
2	4	1	5	1	3	3	1	5	5	3	3
2	4	5	4	3	3	3	1	3	5	1	5
2	4	3	2	3	2	2	2	2	3	3	3
2	4	3	3	3	2	4	2	2	3	3	4
2	4	4	3	3	2	3	2	2	3	3	4
2	4	4	4	3	2	3	2	2	3	3	4
2	4	4	2	4	3	3	4	4	3	3	4
2	4	2	4	2	2	4	2	2	2	4	4
2	4	4	2	4	4	4	5	5	5	2	4
2	4	2	4	2	4	4	4	2	5	4	4
2	4	2	2	4	4	4	2	4	4	4	4
2	4	2	2	4	2	4	4	2	4	2	4
2	4	2	4	4	2	2	4	4	4	4	4
2	4	2	4	2	4	4	2	2	5	5	2
2	4	4	4	5	5	4	4	5	5	2	4
2	4	2	3	3	4	4	3	3	5	4	5
2	4	2	4	4	2	4	3	3	5	4	5
2	4	4	2	2	2	2	2	3	5	1	5
2	4	2	2	2	2	4	2	2	3	3	3
2	4	4	4	3	2	2	2	2	4	4	4
2	4	2	2	2	2	3	2	2	2	3	4
2	4	1	2	2	4		4	3	4	2	2
2	4	2	2	2	4		4	2	4	1	3
2	4	2	2	4	2	4	3	4	4	4	4
2	4	4	3	3	2	4	4	4	4	4	4
2	4	4	4	3	2	3	2	4	4	3	4
2	4	2	4	2	4	4	2	3	3	2	3
2	4	2	4	3	3	4	3	4	4	3	2
2	4	3	4	3	2	3	3	3	4	3	3
2	4	2	4	4	4	4	4	4	4	3	3
2	4	4		4	4	2	2	4	4	3	3
2	4	2	4	2	4	2	4	4	4	4	2
2	4	4	2	4	4	2	4	4	4	2	2
2	4	2	2	2	4	4	4	4	4	4	2
2	4	1	2	2	2	5	4	1	4	3	2
2	4	1	1	1	4	5	3	2	4	3	3
2	4	1	2	2	4	4	2	2	3	1	3
2	4	2	2	2	2	5	2	3	3	2	4
2	4	2	4	2	2	2	2	3	3	3	3
2	4	4	4	3	2	4	2	2	3	4	4
2	4	2	2	4	3	4	3	3	3	3	4
2	4	3	3	3	4	4	1	4	4	2	2
2	4	4	4	2	2	4	2	3	2	4	4
2	4	2	4	4	2	2	2	2	2	2	4
2	4	2	4	2	2	2	4	2	5	2	4
2	4	2	4	5	4	4	4	5	4	2	4
2	4	2	2	2	4	4	4	5	5	2	4
2	4	2	4	3	2	2	2	2	3	2	2
2	4	4	4	2	4	4	2	4	4	4	4
2	4	2	2	2	4	4	4	4	4	3	2
2	4	2	3	3	4	4	4	2	3	4	4
2	4	4	2	4	4	4	4	4	3	4	4
2	4	2	4	3	2	2	2	4	4	4	2
2	4	4	4	4	2	3	2	2	4	4	4
2	4	2	2	3	2	2	4	3	3	4	2
2	4	2	4	4	2	2	2	2	4	4	2
2	4	2	2	4	4	4	4	4	4	4	2
2	4	1	4	2	2	4	2	5	5	4	5
2	4	5	4	5	4	4	4	5	5	4	5
2	4	2	3	4	2	4	4	4	4	3	3
2	4	3	2	4	2	3	4	4	4	4	4
2	4	2	3	4	2	4	4	4	4	4	4
2	4	3	4	2	4	2	2	4	3	3	4
2	4	4	2	2	2	2	4	4	2	4	2
2	4	3	4	4	2	2	2	2	4	4	4
2	4	4	3	3	3	2	2	5	5	4	4
2	4	2	2	2	4	4	5	1	4	3	2
2	4	1	1	2	2	4	4	1	4	2	3
2	4	2	4	2	2	2	4	5	5	4	4
2	4	4	3	2	2	4	2	2	3	3	2
2	4	3	1	3	4	4	2	2	3	3	3
2	4	4	4	2	2	4	5	2	3	4	4
2	4	2	4	2	4	4	4	4	4	3	4
2	4	2	3	2	3	4	3	3	5	3	3
2	4	3	4	2	2	2	2	3	2	4	4
2	4	4	4	4	2	4	4	4	4	4	3
2	4	2	4	3	3	2	2	2	4	4	4
2	4	2	2	4	3	4	4	4	4	4	4
2	4	2	2	4	4	4	4	4	4	2	2
3	4	1	3	4	4	3	1	2	3	3	2
3	4	4	2	3	4	3	3	2	3	4	4
3	4	4	3	2	2	4	4	3	4	4	4
3	4	4	2	2	1	1	4	4	4	5	5
3	4	2	3	3	3	2	2	3	3	4	4
3	4	4	1	4	4	4	1	5	5	1	1
3	4	5	4	2	2	5	4	2	2	4	4
3	4	2	4	2	2	4	2	4	4	4	4
3	4	2	2	4	4	4	2	4	4	2	4
3	4	2	4	4	2	2	2	2	2	4	4
3	4	4	4	2	2	4	2	4	4	4	4
3	4	3	4	3	4	5	1	4	4	4	3
3	4	3	4	4	2	4	2	4	4	4	4
3	4	2	2	2	3	4	2	4	4	3	4
3	4	3	1	2	4	4	2	2	2	3	4
3	4	2	1	5	4	4	1	1	5	4	4
3	4	4	4	4	2	2	2	2	5	4	4
3	4	4	1	5	4	4	4	1	4	2	2
3	4	5	1	2	2	4	2	4	3	4	5
3	4	3	2	4	1	4	4	4	4	5	4
3	4	4	4	2	2	2	4	4	3	3	4
3	4	2	5	1	4	4	2	4	4	2	2
3	4	4	4	2	4	2	2	2	4	2	5
3	4	2	2	2	2	4	4	4	4	3	4
3	4	2	2	4	2	2	4	2	4	4	4
3	4	2	2	2	2	2	2	4	2	2	2
3	4	2	2	4	4	4	2	4	4	3	4
3	4	2	4	2	4	4	2	4	4	4	4
3	4	4	3	2	3	3	3	2	2	4	2
3	4	3	4	2	4	2	3	4	4	4	3
3	4	4	4	4	4	2	4	4	4	4	4
3	4	2	4	2	2	4	4	1	4	2	4
3	4	2	4	2	3	2	2	2	2	2	3
3	4	4	2	2	4	4	2	2	2	4	4
3	4	2	4	3	4	4	2	2	2	4	4
3	4	4	4	2	2	4	3	4	3	4	2
3	4	4	4	2	2	2	4	4	3	4	2
3	4	2		3	1	3	1	1	4	2	4
3	4	2	2	2	3	2	2	1	4	2	4
3	4	3	4	3	1	4	4	3	3	4	2
3	4	4	4	4	2	4	2	4	4	4	4
3	4	2	4	2	4	4	4	4	4	4	4
3	4	1	4	4	2	2	2	4	2	4	4
3	4	3	4	4	4	2	4	4	4	3	3
3	4	3	3	4	2	4	2	4	3	2	4
3	4	2	4	2	4	2	2	4	2	3	2
3	4	3	4	4	1	3	1	3	5	3	3
3	4	4	4	2	2	4	2	2	4	4	4
3	4	2	4	2	2	4	2	2	4	2	4
3	4	2	2	2	2	4	2	4	2	2	2
3	4	2	2	2	2	4	4	4	2	2	4
3	4	2	2	2	2	2	4	4	4	2	4
3	4	4	2	4	2	2	4	2	2	4	2
3	4	4	3	4	4	3	2	4	4	4	4
3	4	4	2	4	2	4	4	4	4	4	1
3	4	4	4	4	4	4	4	4	4	4	4
3	4	4	4	4	2	2	4	4	4	4	2
3	4	2	4	2	2	4	2	2	4	4	4
3	4	2	2	4	2	2	2	2	3	3	4
3	4	3	4	2	2	2	2	4	3	2	3
3	4	2	4	2	2	4	2	4	4	2	4
3	4	2	3	2	4	5	2	2	4	1	4
3	4	3	2	4	2	4	2	2	4	4	4
3	4	4	4	2	4	2	4	2	4	2	4
3	4	2	2	4	4	5	2	5	2	2	2
3	4	2	2	4	2	2	1	3	4	3	2
3	4	1	2	2	3	4	2	2	4	2	5
3	4	3	3	1	1	3	2	4	4	2	4
3	4	2	2	2	2	2	2	2	4	4	4
3	4	2	4	2	1	5	4	1	4	2	2
3	4	2	2	2	2	2	2	4	2	4	2
3	4	2	4	4	1	2	2	2	2	3	5
3	4	3	2	4	2	2	2	3		3	2
3	4	3	3	2	3	5	1	3	3	2	3
3	4	2	2	2	2	4	2	2	2	2	2
3	4	4	4	2	4	4	1	1	4	4	4
3	4	3	4	2	1	5	2	2	5	4	4
3	4	2	4	2	2	4	2	4	4	2	2
3	4	2	4	4	4	4	2	4	4	2	4
3	4	2	4	2	2	4	2	4	2	2	4
3	4	4	4	2	4	4	4	4	4	4	4
3	4	2	2	2	2	2	2	2	2	2	3
3	4	3	2	2	2	2	2	2	2	4	4
3	4	4	2	4	4	4	4	4	4	4	4
3	4	2	3	2	4	4	3	4	4	3	5
3	4	2	3	2	4	4	2	5	5	3	5
3	4	4	4	4	2	2	5	4	4	2	4
3	4	3	2	4	4	3	2	4	3	4	4
3	4	1	5	1	1	1	1	1	1	5	5
3	4	2	2	1	4	4	2	4	2	2	2
3	4	4	2	2	2	5	4	2	3	2	2
3	4	2	4	2	2	2	2	2	2	4	2
3	4	4	4	4	2	4	4	2	4	4	4
3	4	4	2	2	2	4	2	4	4	4	4
3	4	3	1	2	5	1	5	1	1	1	4
3	4	2	1	1	2	2	1	5		4	4
3	4	4	2	4	4	4	2	4	3	3	5
3	4	3	4	4	2	5	2	3	4	3	5
3	4	2	3	2	3	5	5	2	2	4	2
3	4	4	3	4	4	4	4	4	2	4	2
3	4	4	4	4	4	4	4	4	2	4	5
3	4	2	4	3	4	4	4	2	3	3	3
3	4	4	4	2	2	2	4	4	4	4	4
3	4	4	2	2	4	2	2	5	2	4	2
3	4	4	3	3	2	3	2	4	4	2	2
3	4	4	4	4	3	2	4	3	3	3	4
3	4	2	2	2	3	3	2			3	2
3	4	2	2	2	2	2	4	2	2	4	1
3	4	1	4	4	4	4	4	2	4	2	2
3	4	1	2	4	2	1	2	3	3	4	5
3	4	2	4	4	1	5	2	2	3	3	5
3	4	3	4	3	1	1	4	4	4	3	5
3	4	3	4	4	1	5	2	2	2	3	3
3	4	5	3	4	1	5	2	3	2	3	5
3	4	2	2	4	4	4	2	1	4	2	1
3	4	2	2	2	2	5	2	3	5	4	3
3	4	1	1	5	4	5	2	2	4	2	3
3	4	2	4	2	4	2	4	2	5	1	1
3	4	4	4	2	4	4	2	2	4	4	4
3	4	2	4	2	2	4	2	4	4	4	3
3	4	4	2	4	4	3	4	4	4	4	4
3	4	4	4	4	4	2	2	4	4	4	4
3	4	4	2	4	2	2	5	2	4	2	1
3	4	2	2	2	2	2	2	2	2	4	4
3	4	2	2	2	4	4	2	2	2	2	4
3	4	2	4	2	2	2	2	2	2	2	4
3	4	2	2	2	2	4	2	4	2	2	2
3	4	4	4	2	2	2	2	3	2	2	4
3	4	3	3	3	1	2	4	1	3	4	2
3	4	3	1	2	1	2	2	2	3	4	5
3	4	2	2	4	3	3	4	3	3	3	4
3	4	2	4	2	4	4	2	1	5	4	1
3	4	4	4	2	2	5	1	2	5	3	4
3	4	4	2	3	4	2	2	1	3	3	3
3	4	2	1	5	4	4	3	1	5	1	3
3	4	2	2	2	4	5	2	1	5	2	4
3	4	2	3	3	4	2	1	4	5	2	3
3	4	1	4	4	2	4	2	3	3	3	2
3	4	2	2	3	2	2	4	2	3	2	1
3	4	5	4	2	1	4	2	3	4	3	4
3	4	4	4	2	2	4	4	3	4	3	1
3	4		4	2	2	1	2	3	2	3	4
3	4	4	4	2	4	4	2	4	4	4	4
3	4	4	4	4	4	4	2	4	4	2	4
3	4	4	4	2	2	2	2	2	4	4	4
3	4	2	4	2	2	2	2	2	2	4	4
3	4	2	4	4	4	4	2	2	2	4	4
3	4	2	4	2	2	2	2	2	2	4	2
3	4	4	2	4	4	4	4	4	4	2	2
3	4	2	4	2	2	2	2	2	2	2	4
3	4	4	3	4	2	2	3	4	3	3	3
3	4	2	4	4	2	1	2	2	3	2	2
3	4	4	2	4	2	4	2	4	3	1	2
3	4	4	4	4	2	2	2	5	3	4	2
3	4	3	2	1	1	4	2	2	2	1	5
3	4	4	2	2	2	4	2	2	5	4	5
3	4	4	4	2	1	4	5	4	1	1	5
3	4	4	4	2	4	2	2	4	4	4	4
3	4	3	2	2	1	4	4	4	3	1	5
3	4	4	4	4	4	4	4	4	4	4	2
3	4	3	4	2	4	4	4	3	3	3	3
3	4	4	4	2	4	2	2	4	4	4	4
3	4	4	2	4	4	4	4	4	4	4	4
3	4	3	2	2	3	2	2	3	2	3	3
3	4	2	4	4	4	4	4	4	4	2	4
3	4	2	2	2	4	4	4	4	4	4	4
3	4	2	4	2	4	4	2	2	2	4	4
3	4	2	4	4	4	4	2	4	4	4	4
3	4	2	2	4	4	2	4	1	5	2	4
3	4	2	3	4	2	3	4	3	4	1	5
3	4	2	3	2	1	2	1	2	5	2	5
3	4	2	4	2	2	4	2	4	3	4	4
3	4	1	1	2	2	2	2	3	3	1	5
3	4	2	4	1	1	5	1	1	3	1	4
3	4	1	4	5	2	2	4	4	5	3	4
3	4	4	4	2	4	3	2	4	4	4	4
3	4	4	4	4	4	3	2	2	4	4	4
3	4	4	3	2	4	3	2	4	4	4	4
3	4	3	2	5	4	3	2	2	5	2	4
3	4	2	4	2	4	4	2	2	2	4	2
3	4	2	4	2	2	2	2	4	4	2	4
3	4	2	2	2	2	2	2	4	4	2	4
3	4	2	4	3	1	2	1	3	2	3	5
3	4	2	4	4	4	4	2	4	4	2	2
3	4	2	2	2	4	4	2	4	4	2	4
3	4	2	4	4	1	1	5	4	5	1	5
3	4	1	4	1	4	4	2	4	5	2	3
3	4	3	4	4	2	4	2	2	3	2	2
3	4	1	4	2	1	2	2	4	4	3	4
3	4	2	4	2	1	4	1	3	2	2	5
3	4	4	4	2	4	2	2	4	4	4	4
3	4	2	4	4	4	2	3	4	4	4	4
3	4	2	2	2	2	4	2	4	2	2	2
3	4	1	2	1	4	2	2	1	5	1	5
3	4	4	3	2	3	4	2	4	3	3	4
3	4	2	2	4	1	2	2	4	3	3	5
3	4	1	4	3	1	5	4	4	4	1	4
3	4	4	2	2	1	2	2	4	2	2	5
3	4	4	2	4	2	2	2	3	2	3	5
3	4	2	4	2	2	2	2	3	3	3	3
3	4	3	2	2	3	2	2	2	4	4	5
3	4	2	2	2	2	4	2	4	4	4	4
3	4	2	2	4	4	4	4	4	4	4	4
3	4	2	2	2	2	4	4	4	4	2	4
3	4	2	4	2	4	4	2	4	4	2	4
3	4	5	4	2	1	1	1	1	5	4	5
3	4	4	4	4	4	2	2	3	1	1	5
3	4	4	4	2	4	4	2	2	4	4	4
3	4	4	4	4	2	2	2	4	4	4	4
3	4	4	2	2	4	4	2	4	4	4	4
3	4	2	4	2	3	3	2	4	4	4	3
3	4	4	4	2	4	5	1	2	5	4	2
3	4	3	4	2	1	2	1	2	5	1	3
3	4	2	3	2	2	4	2	3	5	2	5
3	4	3	2	2	3	3	2	1	5	1	5
3	4	4	4	2	2	5	1	1	5	1	4
3	4	4	2	4	5	4	2	4	3	3	4
3	4	4	2	4	2	4	2	4	3	2	2
3	4	4	2	4	4	4	3	4	3	2	4
3	4	3	4	4	4	3	4	3	5	2	4
3	4	3	4	4	2	2	4	4	4	3	3
3	4	4	4	4	2	2	2	3	3	3	5
3	4	4	4	4	4	4	2	4	4	4	4
3	4	2	4	2	4	4	2	4	4	2	4
3	4	2	2	2	2	4	2	4	2	2	4
3	4	4	4	2	1	4	5	4	3	2	5
3	4	2	2	5	1	5	2	2	3	5	5
3	4	3	4	4	4	3	2	2	4	1	4
3	4	4	4	2	3	2	4	1	3	3	5
3	4	3	2	4	1	4	2	2	4	2	5
3	4	3	3	2	2	2	2	2	3	3	3
3	4	4	4	4	4	2	2	4	3	2	2
3	4	3	2	2	2	4	2	4	3	4	3
3	4	3	2	4	4	4	2	4	3	3	3
3	4	4	4	2	4	4	3	3	4	2	2
3	4	4	2	4	2	4	2	3	4	3	2
3	4	2	4	4	4	5	1	2	5	2	2
3	4	2	2	2	2	5	2	2	2	2	1
3	4	2	4	2	2	4	2	4	2	2	3
3	4	2	2	4	2	2	2	2	1	2	3
3	4	4	1	4	2	4	1	4	5	1	5
3	4	2	4	2	2	4	2	2	2	4	4
3	4	2	4	2	4	4	2	4	4	3	3
3	4	1	1	5	2	5	1	5	5	5	5
3	4	2	1	3	1	4	1	4	4	2	4
3	4	2	3	1	3	4	1	5	5	4	4
3	4	2	5	2	2	4	2	5	5	3	4
3	4	4	4	4	2	2	2	4	3	4	4
3	4	4	4	2	2	2	2	4	4	4	4
3	4	4	4	2	3	4	2	4	4	4	4
3	4	4	4	2	4	3	2	4	4	4	4
3	4	2	4	1	5	4	1	1	1	1	1
3	4	2	4	4	3	4	3	4	2	2	3
3	4	4	4	1	5	4	1	4	5	1	5
3	4	3	2	4	1	4	1	4	3	1	5
3	4	3	2	2	3	5	2	4	2	2	5
3	4	2	3	4	2	4	3	4	4	2	4
3	4	4	2	2	2	4	2	3	4	2	3
3	4	4	2	3	2	4	2	4	3	2	3
3	4	4	3	4	2	4	2	4	4	3	2
3	4	4	2	4	2	2	4	5	3	2	3
3	4	4	4	2	3	4	2	4	4	4	4
3	4	4	4	2	2	2	2	4	4	4	4
3	4	4	4	2	2	4	3	4	4	4	3
3	4	4	4	2	4	2	2	4	4	4	4
3	4	2	4	2	2	4	2	2	4	4	2
3	4	2	4	2	2	4	2	2	2	4	4
3	4	2	4	2	2	4	1	4	4	4	4
3	4	2	4	2	2	2	2	1	4	4	4
3	4	2	5	1	1	5	1	1	2	3	5
3	4	2	2	4	2	4	2	2	4	2	4
3	4	3	3	2	3	4	2	4	4	4	4
3	4	4	4	2	1	2	2	1	3	1	4
3	4	2	3	5	4	4	2	2	5	2	5
3	4	2	4	4	1	2	1	1	1	4	4
3	4	2	4	2	2	2	1	2	4	2	5
3	4	2	1	2	4	4	2	4	2	2	4
3	4	2	2	2	2	2	2	2	2	4	4
3	4	4	4	2	2	2	2	4	4	4	4
1	5	3	4	2	4	3	4	2	4	4	4
1	5	2	3	3	4		5	3	3	3	4
1	5	3	5	3	1	4	4	5	5	3	4
1	5	4	2	4	4	3	4	4	4	2	3
1	5	1	3	1	1	3	1	1	4	5	2
1	5	3	5	5	5	5	5	5	5	3	5
1	5	1	2	4	2	3	3	4	4	3	4
1	5	1	4	3	5	4	4	1	3	2	5
1	5	4	2	4	4	4	4	4	4	4	4
1	5	3	4	4	4	4	4	5	5	4	4
1	5	1	2	4	4	4	4	4	4	2	4
1	5	2	2	3	4	4	5	4	4	4	5
1	5	2	2	3	5	4	5	4	4	3	5
1	5	2	3	4	4	3	4	4	4	2	4
1	5	2	2	4	4	1	4	4	5	5	4
1	5	1	2	4	1	1	1	1	1	5	2
1	5	3	3	1	1	4	4	4	1	5	2
1	5	4	4	4	2	4	4	4	4	4	2
1	5	3	4	4	4	3	2	4	5	2	4
1	5	1	5	3	1	1	1	4	5	5	5
1	5	2	4	4	4	4	4	4	4	2	4
1	5	4	2	4	4	4	4	4	4	4	4
1	5	1	3	3	4	1	4	4	1	2	2
1	5	4	2	3	5	5	4	5	3	4	1
1	5	2	4	4	4	4	4	5	5	4	4
1	5	2	4	5	4	4	4	5	5	4	4
1	5	2	4	2	2	2	4	2	2	4	5
1	5	2	4	4	4	2	4	4	4	2	4
1	5	4	2	3	2	2	2	2	2	4	2
1	5	3	4	4	4	4	4	4	5	2	5
1	5	2	4	4	4	2	4	4	4	4	4
1	5	4	4	4	1	3	4	2	4	4	2
1	5	4	3	4	5	3	3	5	4	4	3
1	5	2	2	4	2	2	4	4	4	4	4
1	5	2	4	3	4	2	4	4	4	4	4
1	5	4	4	4	3	4	4	5	5	4	4
1	5	4	2	1	5	5	5	5	5	5	5
1	5	3	2	3	3	4	5	4	4	4	3
1	5	2	5	4	4	2	4	5	4	2	4
1	5	4	5	2	5	5	5	2	1	1	1
1	5	4	1	5	5	1	5	3	5	5	5
1	5	3	3	3	4	3	5	5	5	3	5
1	5	4	3	4	5	4	5	5	5	4	5
1	5	4	1	4	4	4	2	4	4	4	2
1	5	1	5	2	3	2	3	2	5	2	4
1	5	3	2	3	4	3	4	2	4	3	4
1	5	2	2	3	4	4	4	4	2	4	5
1	5	2	2	3	4	4	4	3	4	4	3
1	5	3	3	3	4	4	5	3	4	3	4
1	5	2	5	5	4	2	2	5	5	2	5
1	5	2	4	4	4	4	4	4	4	4	4
1	5	4	3	3	4	4	3	3	4	4	4
1	5	4	2	5	5	2	4	3	4	4	3
1	5	4	3	4	3	3	3	4	4	2	3
1	5	1	2	4	5	1	5	3	5	2	5
1	5	3	2	4	4	4	5	5	5	4	4
1	5	2	4	1	1	1	1	2	4	5	4
1	5	5	3	1	5	5	5	5	5	5	1
1	5	4	1	5	5	4	5	5	5	4	1
1	5	3	3	2	4	4	3	2	4	4	2
1	5	3	4	3	4	4	4	4	5	3	5
1	5	3	5	4	4	3	4	3	4	3	4
1	5	3	4	2	2	3	1	1	5	1	5
1	5	3	4	4	4	4	4	4	4	4	3
1	5	2	2	1	5	1	3	1	4	2	5
1	5	5	3	3	3	4	4	4	4	5	5
1	5	5	1	5	5	5	1	5	5	1	5
1	5	3	3	3	5	5	5	4	4	4	4
1	5	5	1	2	3	4	5	5	5	3	1
1	5	4	4	4	3	2	4	4	5	5	5
1	5	1	3	1	1	1	1	1	4	5	5
1	5	4	4	3	2	2	4	5	3	4	1
1	5	4	5	2	1	1	5	4	4	2	1
1	5	2	4	1	1	4	4	5	5	2	5
1	5	4	3	4	4	4	4	4	4	4	4
1	5	4	2	4	4	4	4	4	4	2	4
1	5	2	4	2	3	4	3	5	5	5	5
1	5	1	1	2	3	5	2	3	3	2	5
1	5	3	3	4	3	5	4	4	4	4	5
1	5	1	1	4	3	2	2	5	5	4	1
1	5	2	4	4	4	1	4	5	4	5	2
1	5	4	4	3	2	4	2	3	4	4	5
1	5	1	5	4	5	5	4	1	5	2	2
1	5	3	3	3	4	2	3	5	3	5	5
1	5	2	2	1	5	4	2	5	5	2	5
1	5	4	2	4	4	4	1	4	4	2	2
1	5	4	1	3	2	4	2	2	5	1	1
1	5	4	5	4	5	4	5	5	5	4	4
1	5	1	4	4	1	5	4	5	5	4	4
1	5	2	2	4	4	2	2	2	4	3	4
1	5	2	5	3	4	3	5	4	4	4	4
1	5	1	5	2	2	1	4	4	4	4	5
1	5	2	2	5	4	3	3	4	4	3	2
1	5	1	4	1	1	1	4	2	4	2	5
1	5	4	3	3	2	4	5	3	5	4	1
1	5	2	3		4	3	4	4	4	2	2
1	5	4	4	1	4	4	4	4	4	2	2
1	5	4	4	4	3	3	5	4	3	3	5
1	5	2	4	4	4	4	2	2	5	2	4
1	5	2	2	4	4	2	4	2	4	2	4
1	5	2	4	4	4	4	4	5	5	4	4
1	5	3	5	5	5	3	5	5	5	5	4
1	5	3	5	1	1	4	1	1	4	2	4
1	5	1	2	4	4	2	4	4	4	4	4
1	5	3	1	3	4	4	2	2	2	4	3
1	5	3	2	3	4	4	5	4	3	2	4
1	5	2	3	3	4	4	5	4	4	3	5
1	5	3	2	3	2	4	5	2	4	2	5
1	5	2	3	3	2	3	5	2	3	2	4
1	5	1	1	3	2	3	5	2	3	4	4
1	5	3	4	4	4	4	4	5	5	2	5
1	5	1	3	4	3	1	4	1	4	2	4
1	5	1	3	3	5	5	5	3	4	3	3
1	5	4	4	4	5	4	4	4	4	4	4
1	5	5	2	4	5	4	5	1	4	5	4
1	5	4	4	4	3	2	4	4	4	2	3
1	5	2	4	4	4	4	4	4	4	4	4
1	5	5	2	4	4	4	4	4	4	4	4
1	5	4	4	4	4	4	4	5	4	5	4
1	5	3		3	4	2	4	5	4	3	5
1	5	2	3	3	4	4	5	4	4	3	4
1	5	1	4	3	4	5	5	3	3	5	4
1	5	2	3	3	3	4	4	4	4	3	4
1	5	1	3	4	4	2	4	5	4	4	4
1	5	3	3	1	5	5	4	4	4	3	5
1	5	3	2	5	4	4	4	5	5	5	5
1	5	2	5	2	4	2	4	3	2	4	2
1	5	4	2	2	4	4	5	5	5	2	4
1	5	3	3	4	3	5	4	4	5	4	4
1	5	3	3	5	3	4	4	4	5	4	4
1	5	3	5	2	5	3	4	4	4	4	1
1	5	1	5	5	5	1	5	1	1	5	5
1	5	4	5	4	5	4	5	5	4	5	5
2	5	4	2	4	1	1	4	4	2	3	4
2	5	4	3	4	3	4	2	4	4	4	4
2	5	2	2	2	3	4	5	2	4	3	3
2	5	2	2	4	4	5	4	4	4	4	4
2	5	2	3	4	4	4	2	2	3	4	4
2	5	2	4	2	2	4	4	2	4	2	5
2	5	3	4	4	4	4	4	5	4	3	4
2	5	4	3	5	5	4	3	5	5	4	5
2	5	4	3	2	2	1	2	2	2	2	5
2	5	4	3	3	4	4	2	3	2	3	4
2	5	4	4	3	4	3	2	3	3	4	4
2	5	4	1	5	4	4	2	5	5	4	5
2	5	4	2	4	5	4	2	4	4	5	5
2	5	5	5	5	5	1	3	5	5	5	5
2	5	5	3	4	5	4	5	5	5	3	5
2	5	1	1	4	5	5	2	5	3	5	5
2	5	1	2	4	2	4	4	1	4	3	3
2	5	1	5	5	5	1	1	3	3	3	1
2	5	5	5	4	2	3	4	2	5	4	5
2	5	5	5	4	5	4	2	4	5	3	3
2	5	1	5	4	1	5	5	5	5	1	5
2	5	1	1	1	4	1	1	5	5	4	1
2	5	5	2	4	2	4	3	5	2	3	3
2	5	5	1	1	1	3	5	3	4	4	1
2	5	5	4	5	5	5	5	5	5	5	5
2	5	1	3	1	1	1	3	5	1		5
2	5	2	2	3	2	2	2	2	4	2	3
2	5	1	2	2	2	3	4	2	2	2	3
2	5	4	4	2	3	3	5	5	5	5	5
2	5	5	5	5	5	4	5	5	5	2	5
2	5	5	5	1	5	5	2	1	5	5	5
2	5	5	5	5	1	5	5	3	5	5	5
2	5	5	4	4	5	5	1	5	5	5	5
2	5	5	3	4	1	5	2	5	5	5	5
2	5	1	5	1	1	5	1	1	3	3	5
2	5	1	5	1	1	5	1	1	1	5	1
2	5	1	1	1	1	5	1	1	1	1	5
2	5	4	4	4	5	4	4	4	5	4	4
2	5	4	3	2	4	2	4	5	5	2	2
2	5	1	5	1	1	5	1	1	1	2	2
2	5	4	1	1	1	1	1	5	5	1	1
2	5	1	1	2	4	1	5	5	5	2	2
2	5	4	4	4	4	2	2	4	4	4	3
2	5	3	5	3	4	4	2	4	4	4	4
2	5	2	4	4	4	2	4	4	4	4	4
2	5	2	3	4	4	2	4	2	4	4	4
2	5	4	4	1	4	4	5	5	4	2	5
2	5	3	4	3	3	4	3	4	3	4	4
2	5	1	1	4	5	5	4	5	4	2	2
2	5	3	3	3	3	3	3	3	3	3	3
2	5	4	4	5	2	4	4	5	5	4	4
2	5	4	5	5	5	2	5	5	5	3	5
2	5	2	3	3	3	3	3	3	3	3	3
2	5	2	2	4	5	4	3	3	3	3	3
2	5	3	1	5	5	5	3	3	3	3	3
2	5	3	1	3	3	2	4	2	2	5	4
2	5	3	4	4	5	4	4	5	5	5	1
2	5	5	2	5	4	4	4	5	5	4	5
2	5	2	2	2	2	4	2	2	2	4	4
2	5	2	2	4	3	4	4	4	2	3	3
2	5	4	4	3	3	4	3	4	4	3	3
2	5	3	3	3	2	1	3	5	1	4	4
2	5	4	2	2	2	4	3	4	4	4	2
2	5	5	2	4	4	4	4	4	5	4	4
2	5	4	5	5	3	4	5	4		3	4
2	5	2	2	3	4	4	2	1	4	1	3
2	5	1	2	3	2	3	4	2	4	2	2
2	5	2	2	3	4	3	4	3	4	2	3
2	5	2	2	3	2	3	2	2	1	2	3
2	5	4	2	4	4	4	4	2	4	4	4
2	5	4	2	4	4	3	5	4	5	4	5
2	5	3	4	2	4	1	4	3	5	4	4
2	5	4	3	3	3	3	2	2	1	3	3
2	5	3	5	4	4	5	5	5	5	5	5
2	5	3	4	4	4	3	4	5	5	5	5
2	5	5	5	2	5	4	4	4	4	3	4
2	5	3	3	2	4	4	4	3	3	2	5
2	5	3	3	4	4	5	4	5	4	3	5
2	5	4	3	3	5	2	4	3	3	4	5
2	5	4	2	4	4	4	4	4	4	4	2
2	5	2	5	2	4	5	5	5	5	5	5
2	5	4	4	4	4	5	5	5	4	5	5
2	5	4	3	3	5	4	1	5	5	1	1
2	5	2	4	4	4	4	4	5	5	4	5
2	5	4		2	3	4	4	4	3	4	4
2	5	5	5	4	4	4	2	2	4	2	2
2	5	2	4	4	4	4	3	5	4	2	4
2	5	4	3	4	5	4	5	5	5	5	5
2	5	2	4	2	5	4	5	4	5	4	5
2	5	2	2	1	4	4	4	3	4	5	4
2	5	1		2	5	1	5	1	3	5	1
2	5	4	3	5	5	4	4	4	5	4	5
2	5	4	2	5	3	2	5	5	5	5	5
2	5	3	2	4	5	3	5	5	2	5	5
2	5	4	3	4	4	3	2	5	4	4	4
2	5	4	2	3	2	4	2	5	4	2	5
2	5	2	2	3	5	4	1	2	4	2	4
2	5	3	2	2	4	4	4	5	3	3	4
2	5	4	3	2	4	4	4	5	5	3	4
2	5	2	2	4	4	4	4	4	4	4	5
2	5	4	3	2	4	4	1	5	5	5	5
2	5	4	2	4	4	4	1	4	4	5	5
2	5	4	4	4	5	5	4	5	5	3	3
2	5	2	3	4	4	4	2	5	4	5	5
2	5	2	4	4	4	4	4	4	4	3	5
2	5	4	5	4	5	3	5	5	5	3	5
2	5	2	2	1	5	4	5	5	5	4	5
2	5	1	1	1	1	3	5	2	5	4	5
2	5	1	5	1	1	1	2	5	2	4	2
2	5	3	4	3	3	4	5	3	5	3	3
2	5	3	4	4	4	4	5	5	5	3	5
2	5	3	2	3	4	4	5	3	4	3	5
2	5	2	3	3	5	4	5		1	3	5
2	5	2		3	3	4	5	4	4	3	3
2	5	3	1	5	5	3	1	5	5	1	5
2	5	5	3	5	1	5	5	4	5	1	1
[truncated: 82 more rows]
