# Supplementary figures and images for: Gender norms in sexual and reproductive health and rights: Insights from young Angolan women and the development of a context-specific questionnaire
Source: Research Square preprint supplement (doi:10.21203/rs.3.rs-7037473/v1), 2025-07-16

Additional file 3 Flow chart of analysed participants

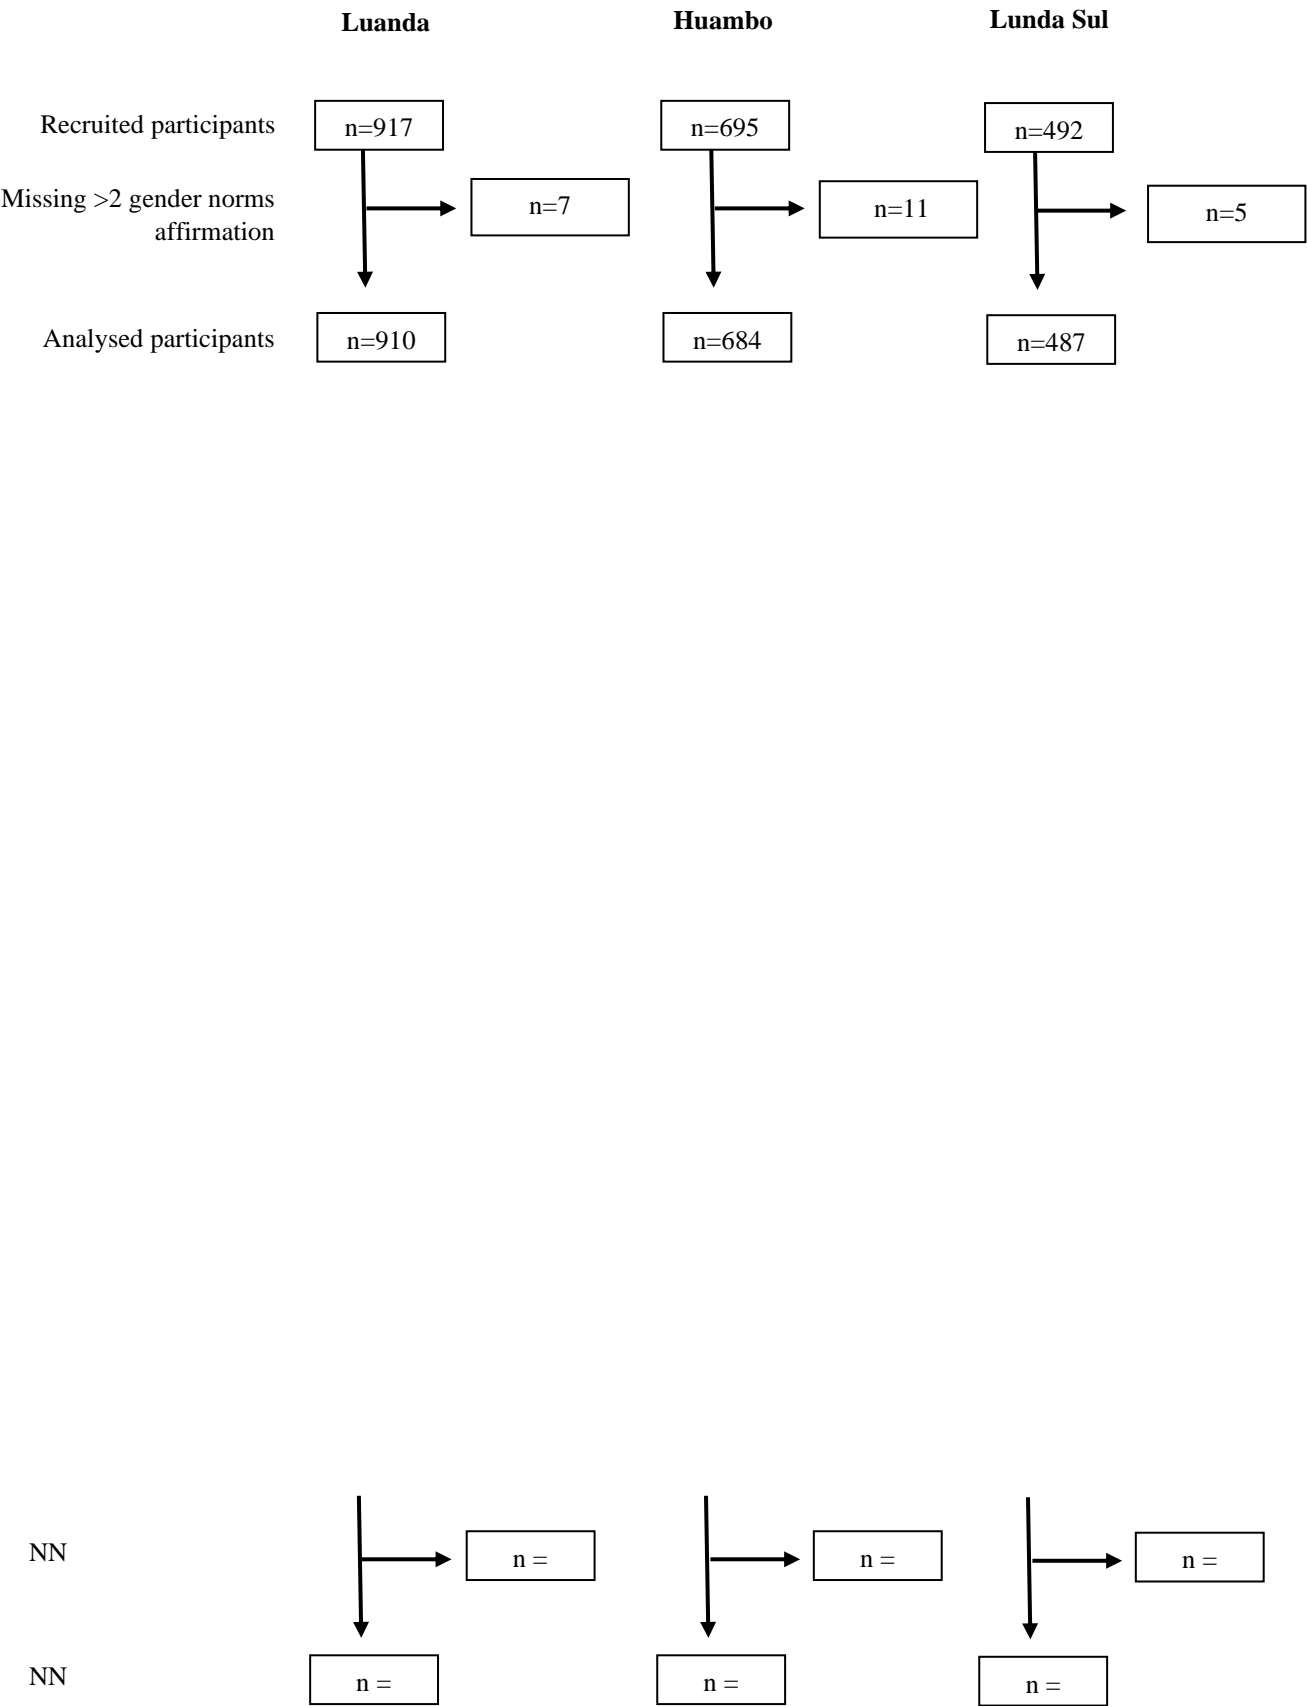

Supplement: Supplementary file 2 [file bd93ee7d3353871ded23ad9d.pdf]
